# Supplementary material for: Acylpyrazolones possessing a heterocyclic moiety in the acyl fragment: intramolecularvs.intermolecular zwitterionic structures
Source: Royal Society of Chemistry journal article supplement (doi:10.1039/d1nj05458a), 2021-12-03

## SUPPORTING INFORMATION

### Acylpyrazolones possessing heterocyclic moiety in the acyl fragment: intramolecular vs intermolecular zwitterionic structure

Stanislava E. Todorova,<sup>a</sup> Rusi I. Rusew,<sup>b</sup> Zhanina S. Petkova,<sup>a</sup> Boris L. Shivachev,<sup>b</sup> Rositsa P. Nikolova,<sup>b</sup> Vanya B. Kurteva<sup>a,\*</sup>

<sup>a</sup>*Institute of Organic Chemistry with Centre of Phytochemistry, Bulgarian Academy of Sciences, Acad. G. Bonchev str., bl. 9, 1113 Sofia, Bulgaria.*

<sup>b</sup>*Institute of Mineralogy and Crystallography "Acad. Ivan Kostov", Bulgarian Academy of Sciences, Acad. G. Bonchev str., bl. 107, 1113 Sofia, Bulgaria.*

## Contents

|                                                                                                                                                                                                            |    |
|------------------------------------------------------------------------------------------------------------------------------------------------------------------------------------------------------------|----|
| <b>Table S1.</b> The most important crystallographic parameters for the crystal structures of <b>4a-j</b> and Cs-complexes.....                                                                            | 3  |
| <b>Tables S2.</b> Observed hydrogen bonding and weak interactions: .....                                                                                                                                   | 5  |
| Compound <b>4a</b> .....                                                                                                                                                                                   | 5  |
| Compound <b>4b</b> .....                                                                                                                                                                                   | 5  |
| Compound <b>4c</b> .....                                                                                                                                                                                   | 5  |
| Compound <b>4d</b> .....                                                                                                                                                                                   | 6  |
| Compound <b>4e</b> .....                                                                                                                                                                                   | 6  |
| Compound <b>4e</b> solvate.....                                                                                                                                                                            | 6  |
| Compound <b>4f</b> .....                                                                                                                                                                                   | 7  |
| Compound <b>4h</b> .....                                                                                                                                                                                   | 7  |
| Compound <b>4i</b> .....                                                                                                                                                                                   | 7  |
| Compound <b>4j</b> .....                                                                                                                                                                                   | 8  |
| <b>Figure S1.</b> View along <i>b</i> of the three-dimensional arrangement of the molecules in the crystal structure of <b>4a</b> ; hydrogen bonding and weak interactions are shown as dotted lines.....  | 9  |
| <b>Figure S2.</b> View along <i>b</i> of the three-dimensional arrangement of the molecules in the crystal structure of <b>4b</b> ; hydrogen bonding and weak interactions are shown as dotted lines.....  | 10 |
| <b>Figure S3.</b> View along <i>b</i> of the three-dimensional arrangement of the molecules in the crystal structure of <b>4c</b> ; hydrogen bonding and weak interactions are shown as dotted lines. .... | 11 |
| <b>Figure S4.</b> View along <i>b</i> of the three-dimensional arrangement of the molecules in the crystal structure of <b>4d</b> ; hydrogen bonding and weak interactions are shown as dotted lines.....  | 12 |

|                                                                                                                                                                                                            |    |
|------------------------------------------------------------------------------------------------------------------------------------------------------------------------------------------------------------|----|
| <b>Figure S5.</b> View along <i>b</i> of the three-dimensional arrangement of the molecules in the crystal structure of <b>4e</b> ; hydrogen bonding and weak interactions are shown as dotted lines. .... | 13 |
| <b>Figure S6.</b> ORTEP view of <b>4e solvate</b> (with acetonitrile in the ASU). ....                                                                                                                     | 14 |
| <b>Figure S8.</b> View along <i>b</i> of the three-dimensional arrangement of the molecules in the crystal structure of <b>4f</b> ; hydrogen bonding and weak interactions are shown as dotted lines. .... | 16 |
| <b>Figure S9.</b> View along <i>b</i> of the three-dimensional arrangement of the molecules in the crystal structure of <b>4i</b> ; hydrogen bonding are shown as dotted lines. ....                       | 16 |
| <b>Table S3.</b> Selected signals in the NMR spectra of ligands <b>4</b> . ....                                                                                                                            | 16 |
| <b>APPENDIX</b> .....                                                                                                                                                                                      | 18 |
| <i>NMR spectra</i> .....                                                                                                                                                                                   | 18 |
| Compound <b>4a</b> .....                                                                                                                                                                                   | 18 |
| Compound <b>4b</b> .....                                                                                                                                                                                   | 20 |
| Compound <b>4c</b> .....                                                                                                                                                                                   | 23 |
| Compound <b>4d</b> .....                                                                                                                                                                                   | 25 |
| Compound <b>4e</b> .....                                                                                                                                                                                   | 28 |
| Compound <b>4f</b> .....                                                                                                                                                                                   | 30 |
| Compound <b>4h</b> .....                                                                                                                                                                                   | 32 |
| Compound <b>4i</b> .....                                                                                                                                                                                   | 35 |
| Compound <b>4j</b> .....                                                                                                                                                                                   | 37 |
| <i>HR-MS spectra:</i> .....                                                                                                                                                                                | 39 |
| Compound <b>2</b> -Cs <sub>2</sub> CO <sub>3</sub> complex: .....                                                                                                                                          | 39 |
| Compound <b>4c</b> .....                                                                                                                                                                                   | 39 |
| Compound <b>4d</b> .....                                                                                                                                                                                   | 40 |
| Compound <b>4e</b> .....                                                                                                                                                                                   | 40 |
| Compound <b>4f</b> .....                                                                                                                                                                                   | 40 |
| Compound <b>4h</b> .....                                                                                                                                                                                   | 41 |
| Compound <b>4i</b> .....                                                                                                                                                                                   | 41 |
| Compound <b>4c</b> -Cs <sub>2</sub> CO <sub>3</sub> complex: .....                                                                                                                                         | 41 |
| Compound <b>4d</b> -Cs <sub>2</sub> CO <sub>3</sub> complex: .....                                                                                                                                         | 42 |
| Compound <b>4i</b> -Cs <sub>2</sub> CO <sub>3</sub> complex: .....                                                                                                                                         | 43 |
| Compound <b>4j</b> -Cs <sub>2</sub> CO <sub>3</sub> complex: .....                                                                                                                                         | 43 |

**Table S1.** The most important crystallographic parameters for the crystal structures of **4a-j** and Cs-complexes.

| Compound                                                    | B_0124                                                            | B_0126                                                            | B_0130                                                            | B_0144                                                                         | B_0145                                                            | B_0146                                                            | B_0147                                                            |
|-------------------------------------------------------------|-------------------------------------------------------------------|-------------------------------------------------------------------|-------------------------------------------------------------------|--------------------------------------------------------------------------------|-------------------------------------------------------------------|-------------------------------------------------------------------|-------------------------------------------------------------------|
| Compound                                                    | <b>4e solvent</b>                                                 | <b>4c</b>                                                         | <b>4e</b>                                                         | <b>2 compl.</b>                                                                | <b>4d</b>                                                         | <b>4d Cs</b>                                                      | <b>4i compl.</b>                                                  |
| CCDC                                                        | 2119868                                                           | 2119863                                                           | 2119859                                                           | 2119866                                                                        | 2119861                                                           | 2119862                                                           | 2119864                                                           |
| Empirical formula                                           | C <sub>34</sub> H <sub>41</sub> N <sub>7</sub> O <sub>4</sub>     | C <sub>16</sub> H <sub>19</sub> N <sub>3</sub> O <sub>2</sub> S   | C <sub>16</sub> H <sub>19</sub> N <sub>3</sub> O <sub>2</sub>     | C <sub>13</sub> H <sub>10</sub> ClC <sub>8</sub> N <sub>2</sub> O <sub>5</sub> | C <sub>22</sub> H <sub>24</sub> N <sub>4</sub> O <sub>2</sub>     | C <sub>26</sub> H <sub>29</sub> CsN <sub>6</sub> O <sub>2</sub>   | C <sub>20</sub> H <sub>26</sub> CsN <sub>3</sub> O <sub>5</sub>   |
| Formula weight                                              | 611.74                                                            | 317.40                                                            | 285.34                                                            | 442.59                                                                         | 376.45                                                            | 590.46                                                            | 521.35                                                            |
| Temperature                                                 | 290K                                                              | 290K                                                              | 290K                                                              | 290K                                                                           | 290K                                                              | 290K                                                              | 290K                                                              |
| Crystal system                                              | Triclinic                                                         | Monoclinic                                                        | Monoclinic                                                        | Orthorhombic                                                                   | Monoclinic                                                        | Triclinic                                                         | Monoclinic                                                        |
| Space group                                                 | <i>P</i> -1                                                       | <i>P</i> 2 <sub>1</sub>                                           | <i>P</i> 2 <sub>1</sub> / <i>n</i>                                | <i>F</i> dd2                                                                   | <i>P</i> 2 <sub>1</sub> / <i>c</i>                                | <i>P</i> -1                                                       | <i>P</i> 2 <sub>1</sub> / <i>n</i>                                |
| <i>a</i> /Å                                                 | 9.9053(5)                                                         | 9.6424(5)                                                         | 11.3849(4)                                                        | 48.4669(10)                                                                    | 13.0544(6)                                                        | 9.5466(8)                                                         | 8.1311(3)                                                         |
| <i>b</i> /Å                                                 | 11.6377(6)                                                        | 8.0087(3)                                                         | 9.9562(4)                                                         | 32.2650(5)                                                                     | 13.0083(6)                                                        | 11.0591(11)                                                       | 18.2830(6)                                                        |
| <i>c</i> /Å                                                 | 15.0249(6)                                                        | 10.9078(5)                                                        | 13.2945(5)                                                        | 4.40930(10)                                                                    | 11.7110(5)                                                        | 14.5749(14)                                                       | 14.9298(5)                                                        |
| $\alpha$ /°                                                 | 86.844(4)                                                         | 90                                                                | 90                                                                | 90                                                                             | 90                                                                | 72.225(3)                                                         | 90                                                                |
| $\beta$ /°                                                  | 89.823(4)                                                         | 109.047(2)                                                        | 101.3400(10)                                                      | 90                                                                             | 104.3530(10)                                                      | 80.490(2)                                                         | 101.0150(10)                                                      |
| $\gamma$ /°                                                 | 69.381(5)                                                         | 90                                                                | 90                                                                | 90                                                                             | 90                                                                | 70.549(2)                                                         | 90                                                                |
| Volume/Å <sup>3</sup>                                       | 1618.34(14)                                                       | 796.22(6)                                                         | 1477.52(10)                                                       | 6895.2(2)                                                                      | 1926.64(15)                                                       | 1378.2(2)                                                         | 2178.59(13)                                                       |
| <i>Z</i>                                                    | 2                                                                 | 2                                                                 | 4                                                                 | 16                                                                             | 4                                                                 | 2                                                                 | 4                                                                 |
| $\rho_{\text{calc}}$ /cm <sup>3</sup>                       | 1.255                                                             | 1.324                                                             | 1.283                                                             | 1.705                                                                          | 1.298                                                             | 1.423                                                             | 1.590                                                             |
| $\mu$ /mm <sup>-1</sup>                                     | 0.085                                                             | 0.214                                                             | 0.087                                                             | 2.324                                                                          | 0.085                                                             | 1.376                                                             | 1.735                                                             |
| <i>F</i> (000)                                              | 652.0                                                             | 336.0                                                             | 608.0                                                             | 3424.0                                                                         | 800.0                                                             | 596.0                                                             | 1048.0                                                            |
| Crystal size/mm <sup>3</sup>                                | 0.35×0.2×0.1                                                      | 0.1×0.05×0.05                                                     | 0.5×0.4×0.3                                                       | 0.3×0.1×0.05                                                                   | 0.2×0.15×0.1                                                      | 0.3×0.25×0.2                                                      | 0.3×0.25×0.2                                                      |
| Radiation                                                   | MoK $\alpha$<br>$\lambda = 0.71073$                                            | MoK $\alpha$<br>$\lambda = 0.71073$                               | MoK $\alpha$<br>$\lambda = 0.71073$                               | MoK $\alpha$<br>$\lambda = 0.71073$                               |
| 2 $\theta$ range for data collection/°                      | 3.746–52.742                                                      | 3.95–61.006                                                       | 5.482–52.334                                                      | 3.032–52.028                                                                   | 4.492–54.968                                                      | 4.536–57.396                                                      | 4.456–55.296                                                      |
| Reflections collected/independent                           | 11782/11782                                                       | 44584/4862                                                        | 25571/2916                                                        | 33825/3406                                                                     | 37820/4394                                                        | 78956/6899                                                        | 68060/5020                                                        |
| Rint/Rsigma                                                 | *twin/0.0906                                                      | 0.0483/0.0319                                                     | 0.0531/0.0275                                                     | 0.0437/0.0185                                                                  | 0.0681/0.0407                                                     | 0.0410/0.0191                                                     | 0.0363/0.0146                                                     |
| Data/restraints/parameters                                  | 11782/0/418                                                       | 4862/1/204                                                        | 2916/0/195                                                        | 3406/1/200                                                                     | 4394/0/259                                                        | 6899/0/319                                                        | 5020/0/263                                                        |
| Goodness-of-fit on <i>F</i> <sup>2</sup>                    | 0.934                                                             | 1.139                                                             | 1.065                                                             | 1.136                                                                          | 1.059                                                             | 1.083                                                             | 1.115                                                             |
| Final <i>R</i> indexes [ <i>I</i> ≥2 $\sigma$ ( <i>I</i> )] | <i>R</i> <sub>1</sub> = 0.0640<br><i>wR</i> <sub>2</sub> = 0.1680 | <i>R</i> <sub>1</sub> = 0.0550<br><i>wR</i> <sub>2</sub> = 0.1151 | <i>R</i> <sub>1</sub> = 0.0475<br><i>wR</i> <sub>2</sub> = 0.1218 | <i>R</i> <sub>1</sub> = 0.0308<br><i>wR</i> <sub>2</sub> = 0.0724              | <i>R</i> <sub>1</sub> = 0.0502<br><i>wR</i> <sub>2</sub> = 0.1052 | <i>R</i> <sub>1</sub> = 0.0287<br><i>wR</i> <sub>2</sub> = 0.0630 | <i>R</i> <sub>1</sub> = 0.0385<br><i>wR</i> <sub>2</sub> = 0.0824 |
| Final <i>R</i> indexes [all data]                           | <i>R</i> <sub>1</sub> = 0.1162<br><i>wR</i> <sub>2</sub> = 0.1790 | <i>R</i> <sub>1</sub> = 0.0659<br><i>wR</i> <sub>2</sub> = 0.1197 | <i>R</i> <sub>1</sub> = 0.0556<br><i>wR</i> <sub>2</sub> = 0.1294 | <i>R</i> <sub>1</sub> = 0.0324<br><i>wR</i> <sub>2</sub> = 0.0738              | <i>R</i> <sub>1</sub> = 0.0867<br><i>wR</i> <sub>2</sub> = 0.1221 | <i>R</i> <sub>1</sub> = 0.0379<br><i>wR</i> <sub>2</sub> = 0.0701 | <i>R</i> <sub>1</sub> = 0.0447<br><i>wR</i> <sub>2</sub> = 0.0863 |
| Largest diff. peak/hole / e Å <sup>-3</sup>                 | 0.49/-0.49                                                        | 0.24/-0.23                                                        | 0.37/-0.19                                                        | 0.61/-0.38                                                                     | 0.18/-0.18                                                        | 0.62/-0.67                                                        | 0.94/-0.78                                                        |

**Table S1.** Continued.

| <b>Compound</b>                                | B_0161                                                            | B_0168                                                            | B_0170                                                            | B_0175                                                            | S_373                                                             | A167                                                               | B_0178                                                             |
|------------------------------------------------|-------------------------------------------------------------------|-------------------------------------------------------------------|-------------------------------------------------------------------|-------------------------------------------------------------------|-------------------------------------------------------------------|--------------------------------------------------------------------|--------------------------------------------------------------------|
| <b>Compound</b>                                | <b>4h</b>                                                         | <b>4f</b>                                                         | <b>4j compl.</b>                                                  | <b>4i</b>                                                         | <b>4b</b>                                                         | <b>4a</b>                                                          | <b>4c compl.</b>                                                   |
| <b>CCDC</b>                                    | 2119867                                                           | 2119870                                                           | 2119865                                                           | 2119869                                                           | 2119860                                                           | 2119858                                                            | 2119871                                                            |
| Empirical formula                              | C <sub>19</sub> H <sub>25</sub> N <sub>3</sub> O <sub>2</sub>     | C <sub>18</sub> H <sub>23</sub> N <sub>3</sub> O <sub>2</sub>     | C <sub>22</sub> H <sub>32</sub> CsN <sub>3</sub> O <sub>7</sub>   | C <sub>20</sub> H <sub>29</sub> N <sub>3</sub> O <sub>6</sub>     | C <sub>16</sub> H <sub>19</sub> N <sub>3</sub> O <sub>3</sub>     | C <sub>17</sub> H <sub>21</sub> N <sub>3</sub> O <sub>2</sub>      | C <sub>17</sub> H <sub>26</sub> CsN <sub>3</sub> O <sub>8</sub> S  |
| Formula weight                                 | 327.42                                                            | 313.39                                                            | 583.41                                                            | 407.46                                                            | 301.34                                                            | 299.37                                                             | 565.38                                                             |
| Temperature                                    | 290K                                                              | 290K                                                              | 290K                                                              | 290K                                                              | 290K                                                              | 290                                                                | 290                                                                |
| Crystal system                                 | Monoclinic                                                        | Monoclinic                                                        | Monoclinic                                                        | Monoclinic                                                        | Monoclinic                                                        | Monoclinic                                                         | Triclinic                                                          |
| Space group                                    | <i>P</i> <sub>2</sub> / <i>c</i>                                  | <i>P</i> <sub>2</sub> / <i>n</i>                                  | <i>P</i> <sub>2</sub>                                              | <i>P</i> -1                                                        |
| <i>a</i> /Å                                    | 6.7988(8)                                                         | 6.7130(5)                                                         | 11.8674(8)                                                        | 12.097(3)                                                         | 9.4773(2)                                                         | 9.6845(4)                                                          | 7.6127(10)                                                         |
| <i>b</i> /Å                                    | 18.792(2)                                                         | 18.2866(15)                                                       | 12.8807(8)                                                        | 14.929(3)                                                         | 7.8846(2)                                                         | 7.9709(4)                                                          | 11.6570(11)                                                        |
| <i>c</i> /Å                                    | 13.5975(16)                                                       | 13.4679(11)                                                       | 16.3307(11)                                                       | 11.827(3)                                                         | 20.2726(5)                                                        | 10.8995(5)                                                         | 15.4167(19)                                                        |
| $\alpha$ /°                                    | 90                                                                | 90                                                                | 90                                                                | 90                                                                | 90                                                                | 90                                                                 | 101.296(4)                                                         |
| $\beta$ /°                                     | 94.066(4)                                                         | 92.780(3)                                                         | 92.978(2)                                                         | 107.816(8)                                                        | 95.646(2)                                                         | 108.389(9)                                                         | 103.003(3)                                                         |
| $\gamma$ /°                                    | 90                                                                | 90                                                                | 90                                                                | 90                                                                | 90                                                                | 90                                                                 | 105.412(4)                                                         |
| Volume/Å <sup>3</sup>                          | 1732.9(4)                                                         | 1651.3(2)                                                         | 2492.9(3)                                                         | 2033.4(8)                                                         | 1507.50(7)                                                        | 798.41(7)                                                          | 1236.6(3)                                                          |
| <i>Z</i>                                       | 4                                                                 | 4                                                                 | 4                                                                 | 4                                                                 | 4                                                                 | 2                                                                  | 2                                                                  |
| $\rho_{\text{calc}}$ /cm <sup>3</sup>          | 1.255                                                             | 1.261                                                             | 1.554                                                             | 1.331                                                             | 1.328                                                             | 1.245                                                              | 1.518                                                              |
| $\mu$ /mm <sup>-1</sup>                        | 0.083                                                             | 0.084                                                             | 1.531                                                             | 0.099                                                             | 0.093                                                             | 0.083                                                              | 1.624                                                              |
| <i>F</i> (000)                                 | 704.0                                                             | 672.0                                                             | 1184.0                                                            | 872.0                                                             | 640.0                                                             | 320.0                                                              | 568.0                                                              |
| Crystal size/mm <sup>3</sup>                   | 0.3×0.3×0.3                                                       | 0.3×0.25×0.25                                                     | 0.4×0.3×0.3                                                       | 0.5×0.3×0.3                                                       | 0.3×0.25×0.12                                                     | 0.32 ×0.24×0.22                                                    | 0.25×0.1×0.1                                                       |
| Radiation                                      | MoK $\alpha$<br>$\lambda = 0.71073$                                | MoK $\alpha$<br>$\lambda = 0.71073$                                |
| 2 $\theta$ range for data collection/°         | 5.274–54.206                                                      | 5.388– 54.206                                                     | 4.03–54.202                                                       | 4.532–50.536                                                      | 5.548–87.384                                                      | 3.938 to 55.95                                                     | 5.284 to 52.098                                                    |
| Reflections collected/<br>independent          | 50776/3786                                                        | 51749/3619                                                        | 76373/5427                                                        | 48896/3601                                                        | 32182/11468                                                       | 3905 /3698                                                         | 62002/4829                                                         |
| Rint/Rsigma                                    | 0.0518/0.0216                                                     | 0.0611/0.0243                                                     | 0.0429/0.0171                                                     | 0.0429/0.0175                                                     | 0.0267/0.0333                                                     | 0.0381/0.0688                                                      | 0.0296/0.0130                                                      |
| Data/restraints/<br>parameters                 | 3786/0/242                                                        | 3619/0/232                                                        | 5427/6/329                                                        | 3601/0/276                                                        | 11468/0/275                                                       | 3698/1/204                                                         | 4829/1/282                                                         |
| Goodness-of-fit on <i>F</i> <sup>2</sup>       | 1.028                                                             | 1.091                                                             | 1.064                                                             | 1.035                                                             | 1.023                                                             | 1.000                                                              | 1.066                                                              |
| Final <i>R</i> indexes<br>[I>=2 $\sigma$ (I)]  | <i>R</i> <sub>1</sub> = 0.0660<br><i>wR</i> <sub>2</sub> = 0.1609 | <i>R</i> <sub>1</sub> = 0.0725<br><i>wR</i> <sub>2</sub> = 0.1973 | <i>R</i> <sub>1</sub> = 0.0383<br><i>wR</i> <sub>2</sub> = 0.1034 | <i>R</i> <sub>1</sub> = 0.0368<br><i>wR</i> <sub>2</sub> = 0.0936 | <i>R</i> <sub>1</sub> = 0.0661<br><i>wR</i> <sub>2</sub> = 0.1706 | <i>R</i> <sub>1</sub> = 0.0568,<br><i>wR</i> <sub>2</sub> = 0.1202 | <i>R</i> <sub>1</sub> = 0.0268,<br><i>wR</i> <sub>2</sub> = 0.0675 |
| Final <i>R</i> indexes<br>[all data]           | <i>R</i> <sub>1</sub> = 0.0791<br><i>wR</i> <sub>2</sub> = 0.1720 | <i>R</i> <sub>1</sub> = 0.0904<br><i>wR</i> <sub>2</sub> = 0.2115 | <i>R</i> <sub>1</sub> = 0.0458<br><i>wR</i> <sub>2</sub> = 0.1106 | <i>R</i> <sub>1</sub> = 0.0411<br><i>wR</i> <sub>2</sub> = 0.0977 | <i>R</i> <sub>1</sub> = 0.1196<br><i>wR</i> <sub>2</sub> = 0.2070 | <i>R</i> <sub>1</sub> = 0.1150,<br><i>wR</i> <sub>2</sub> = 0.1419 | <i>R</i> <sub>1</sub> = 0.0292,<br><i>wR</i> <sub>2</sub> = 0.0703 |
| Largest diff.<br>peak/hole / e Å <sup>-3</sup> | 0.57/-0.36                                                        | 0.29/-0.23                                                        | 0.61/-0.52                                                        | 0.17/-0.16                                                        | 0.35/-0.25                                                        | 0.14/-0.17                                                         | 0.56/-0.58                                                         |
|                                                |                                                                   |                                                                   |                                                                   |                                                                   |                                                                   |                                                                    |                                                                    |

**Tables S2.** Observed hydrogen bonding and weak interactions:*Compound 4a*

| <i>D—H</i> ⋯ <i>A</i>      | <i>D—H</i> | <i>H</i> ⋯ <i>A</i> | <i>D</i> ⋯ <i>A</i> | <i>D—H</i> ⋯ <i>A</i> |
|----------------------------|------------|---------------------|---------------------|-----------------------|
| C13—H13A⋯O11 <sup>i</sup>  | 0.97       | 2.56                | 3.389 (5)           | 143                   |
| C12—H12B⋯O11 <sup>i</sup>  | 0.97       | 2.60                | 3.429 (6)           | 143                   |
| C16—H16B⋯N2 <sup>ii</sup>  | 0.97       | 2.65                | 3.606 (6)           | 169                   |
| C14—H14A⋯O1 <sup>iii</sup> | 0.97       | 2.48                | 3.299 (5)           | 143                   |
| C17—H17A⋯N2 <sup>iv</sup>  | 0.97       | 2.62                | 3.476 (5)           | 148                   |
| C17—H17B⋯O11 <sup>i</sup>  | 0.97       | 2.51                | 3.351 (5)           | 145                   |
| C10—H10⋯O1                 | 0.93       | 2.26                | 2.886 (5)           | 124                   |

Symmetry codes: (i)  $2-x, 1/2+y, 1-z$ ; (ii)  $+x, 1+y, +z$ ; (iii)  $2-x, 1/2+y, 2-z$ ; (iv)  $1-x, 1/2+y, 1-z$ .

*Compound 4b*

| <i>D—H</i> ⋯ <i>A</i>      | <i>D—H</i> | <i>H</i> ⋯ <i>A</i> | <i>D</i> ⋯ <i>A</i> | <i>D—H</i> ⋯ <i>A</i> |
|----------------------------|------------|---------------------|---------------------|-----------------------|
| C16—H16A⋯N2 <sup>i</sup>   | 0.938 (14) | 2.625 (14)          | 3.4762 (13)         | 151.1 (11)            |
| C16—H16B⋯O11 <sup>ii</sup> | 1.024 (17) | 2.307 (17)          | 3.2756 (13)         | 157.4 (13)            |
| C10—H10⋯O1                 | 0.99 (2)   | 2.19 (2)            | 2.8843 (14)         | 125.8 (15)            |
| C12—H12B⋯O11 <sup>ii</sup> | 1.000 (17) | 2.592 (17)          | 3.4384 (15)         | 142.3 (13)            |
| N3—H3⋯O1                   | 1.036 (16) | 1.528 (17)          | 2.5475 (10)         | 166.8 (15)            |

Symmetry codes: (i)  $-x+1/2, y-1/2, -z+1/2$ ; (ii)  $-x+3/2, y-1/2, -z+1/2$ .

*Compound 4c*

| <i>D—H</i> ⋯ <i>A</i>      | <i>D—H</i> | <i>H</i> ⋯ <i>A</i> | <i>D</i> ⋯ <i>A</i> | <i>D—H</i> ⋯ <i>A</i> |
|----------------------------|------------|---------------------|---------------------|-----------------------|
| C13—H13A⋯O11 <sup>i</sup>  | 0.97       | 2.46                | 3.307 (3)           | 146                   |
| C13—H13B⋯N2 <sup>ii</sup>  | 0.97       | 2.64                | 3.484 (3)           | 146                   |
| C12—H12A⋯O11 <sup>i</sup>  | 0.97       | 2.60                | 3.420 (4)           | 143                   |
| C16—H16B⋯O11 <sup>i</sup>  | 0.97       | 2.61                | 3.421 (4)           | 141                   |
| C15—H15A⋯S1 <sup>iii</sup> | 0.97       | 3.03                | 3.688 (4)           | 126                   |
| C15—H15B⋯O1 <sup>iv</sup>  | 0.97       | 2.34                | 3.223 (4)           | 151                   |
| C14—H14A⋯N2 <sup>v</sup>   | 0.97       | 2.65                | 3.588 (4)           | 162                   |
| C10—H10⋯O1                 | 0.93       | 2.26                | 2.886 (4)           | 124                   |

|                             |          |          |           |         |
|-----------------------------|----------|----------|-----------|---------|
| N3—H3···O1                  | 0.86 (4) | 1.70 (4) | 2.548 (3) | 167 (3) |
| C13—H13A···O11 <sup>i</sup> | 0.97     | 2.46     | 3.307 (3) | 146     |

Symmetry codes: (i)  $-x, y-1/2, -z+1$ ; (ii)  $-x+1, y-1/2, -z+1$ ; (iii)  $-x, y+1/2, -z$ ; (iv)  $-x, y-1/2, -z$ ; (v)  $x, y-1, z$ .

*Compound 4d*

| <i>D</i> —H··· <i>A</i> | <i>D</i> —H | H··· <i>A</i> | <i>D</i> ··· <i>A</i> | <i>D</i> —H··· <i>A</i> |
|-------------------------|-------------|---------------|-----------------------|-------------------------|
| C15—H15B···N2i          | 0.97        | 2.64          | 3.575 (2)             | 162                     |
| C16—H16B···O11          | 0.97        | 2.54          | 3.077 (2)             | 115                     |
| C14—H14B···O1ii         | 0.97        | 2.52          | 3.218 (2)             | 128                     |
| C22—H22···N2i           | 0.93        | 2.53          | 3.459 (3)             | 174                     |
| C10—H10···O1            | 0.93        | 2.44          | 2.964 (2)             | 116                     |
| N3—H3···O1ii            | 0.98 (2)    | 1.76 (2)      | 2.6944 (19)           | 159.6 (18)              |

Symmetry codes: (i)  $x+1, y, z$ ; (ii)  $-x+2, -y+2, -z+1$ ; (iii)  $x-1, y, z$ .

*Compound 4e*

| <i>D</i> —H··· <i>A</i>     | <i>D</i> —H | H··· <i>A</i> | <i>D</i> ··· <i>A</i> | <i>D</i> —H··· <i>A</i> |
|-----------------------------|-------------|---------------|-----------------------|-------------------------|
| C12—H12A···O11 <sup>i</sup> | 0.97        | 2.63          | 3.3875 (19)           | 135                     |
| C13—H13B···O11 <sup>i</sup> | 0.97        | 2.55          | 3.424 (2)             | 151                     |
| C16—H16A···N2 <sup>ii</sup> | 0.97        | 2.54          | 3.458 (2)             | 158                     |
| N3—H3···O1 <sup>iii</sup>   | 0.90 (2)    | 1.91 (2)      | 2.7669 (17)           | 158.0 (19)              |

Symmetry codes: (i)  $-x+3/2, y-1/2, -z+3/2$ ; (ii)  $-x+1, -y+1, -z+1$ ; (iii)  $-x+3/2, y+1/2, -z+3/2$ .

*Compound 4e solvate*

| <i>D</i> —H··· <i>A</i>         | <i>D</i> —H | H··· <i>A</i> | <i>D</i> ··· <i>A</i> | <i>D</i> —H··· <i>A</i> |
|---------------------------------|-------------|---------------|-----------------------|-------------------------|
| C132—H13A···O111                | 0.97        | 2.30          | 3.261 (3)             | 169                     |
| C122—H12B···N2 <sup>i</sup>     | 0.97        | 2.64          | 3.357 (5)             | 131                     |
| C102—H102···O12                 | 0.93        | 2.51          | 2.989 (3)             | 112                     |
| C162—H16B···N22 <sup>ii</sup>   | 0.97        | 2.56          | 3.511 (4)             | 166                     |
| C121—H12C···O11                 | 0.97        | 2.33          | 2.886 (3)             | 116                     |
| C121—H12D···O112 <sup>iii</sup> | 0.97        | 2.52          | 3.275 (4)             | 135                     |
| C101—H101···O11                 | 0.93        | 2.47          | 2.949 (4)             | 113                     |

|                             |          |          |           |         |
|-----------------------------|----------|----------|-----------|---------|
| N31—H31···O12               | 0.91 (3) | 1.94 (3) | 2.771 (3) | 151 (2) |
| C161—H16C···N2 <sup>i</sup> | 0.97     | 2.58     | 3.446 (6) | 149     |
| N32—H32···O11 <sup>i</sup>  | 0.89 (3) | 1.96 (3) | 2.782 (3) | 153 (3) |

Symmetry codes: (i)  $x+1, y, z$ ; (ii)  $-x+2, -y+2, -z+1$ ; (iii)  $x-1, y, z$ .

#### Compound 4f

| $D-H\cdots A$               | $D-H$    | $H\cdots A$ | $D\cdots A$ | $D-H\cdots A$ |
|-----------------------------|----------|-------------|-------------|---------------|
| C6—H6···O1 <sup>i</sup>     | 0.93     | 2.54        | 3.333 (3)   | 144           |
| C12—H12B···N2 <sup>ii</sup> | 0.97     | 2.60        | 3.557 (4)   | 169           |
| N3—H3···O1                  | 0.99 (3) | 1.60 (4)    | 2.571 (3)   | 165 (3)       |

Symmetry code: (i)  $x-1, y, z$ ; (ii)  $x+1, y, z$ .

#### Compound 4h

| $D-H\cdots A$               | $D-H$    | $H\cdots A$ | $D\cdots A$ | $D-H\cdots A$ |
|-----------------------------|----------|-------------|-------------|---------------|
| C6—H6···O1 <sup>i</sup>     | 0.93     | 2.60        | 3.408 (3)   | 145           |
| C12—H12A···N2 <sup>ii</sup> | 0.97     | 2.63        | 3.570 (3)   | 163           |
| N3—H3···O1                  | 0.93 (3) | 1.69 (3)    | 2.600 (2)   | 166 (2)       |

Symmetry code: (i)  $x-1, y, z$ ; (ii)  $x+1, y, z$ .

#### Compound 4i

| $D-H\cdots A$                 | $D-H$    | $H\cdots A$ | $D\cdots A$ | $D-H\cdots A$ |
|-------------------------------|----------|-------------|-------------|---------------|
| C20—H20B···O1 <sup>i</sup>    | 0.97     | 2.59        | 3.5193 (17) | 161           |
| C10—H10···O1                  | 0.93     | 2.34        | 2.8794 (18) | 117           |
| C12—H12A···O1W <sup>i</sup>   | 0.97     | 2.36        | 3.294 (2)   | 160           |
| C12—H12B···O1                 | 0.97     | 2.30        | 2.8845 (18) | 118           |
| C13—H13A···O11 <sup>ii</sup>  | 0.97     | 2.62        | 3.3145 (18) | 128           |
| C13—H13B···O3                 | 0.97     | 2.63        | 3.1129 (18) | 111           |
| C13—H13B···O4 <sup>ii</sup>   | 0.97     | 2.53        | 3.1244 (19) | 119           |
| C19—H19A···O1W <sup>i</sup>   | 0.97     | 2.63        | 3.303 (2)   | 126           |
| O1W—H1WA···O1                 | 0.95 (3) | 1.90 (3)    | 2.8302 (18) | 165 (2)       |
| O1W—H1WB···O11 <sup>iii</sup> | 0.91 (3) | 2.17 (3)    | 2.9858 (17) | 150 (2)       |
| O1W—H1WB···O2 <sup>ii</sup>   | 0.91 (3) | 2.47 (3)    | 3.0723 (19) | 124 (2)       |

|             |            |            |             |            |
|-------------|------------|------------|-------------|------------|
| N3—H3···O11 | 0.859 (16) | 2.168 (15) | 2.6650 (15) | 116.6 (12) |
| N3—H3···O3  | 0.859 (16) | 2.428 (15) | 2.9904 (15) | 123.6 (12) |
| N3—H3···O4  | 0.859 (16) | 2.461 (15) | 2.8885 (16) | 111.5 (12) |

Symmetry codes: (i)  $-x+1, -y+1, -z+1$ ; (ii)  $x, -y+1/2, z-1/2$ .

*Compound 4j*

| <i>D</i> —H··· <i>A</i>       | <i>D</i> —H | H··· <i>A</i> | <i>D</i> ··· <i>A</i> | <i>D</i> —H··· <i>A</i> |
|-------------------------------|-------------|---------------|-----------------------|-------------------------|
| C10—H10···O1                  | 0.93        | 2.28          | 2.899 (4)             | 124                     |
| C13—H13A···O11                | 0.97        | 2.51          | 3.050 (4)             | 115                     |
| C22—H22B···O11                | 0.97        | 2.64          | 3.105 (4)             | 110                     |
| O1WA—H1WA···O1                | 0.85        | 2.19          | 2.843 (4)             | 134                     |
| O1WA—H1WB···O11 <sup>iv</sup> | 0.85        | 2.33          | 2.861 (5)             | 121                     |
| O1WB—H1WC···O1                | 0.90        | 2.10          | 2.613 (7)             | 115                     |
| C10—H10···O1                  | 0.93        | 2.28          | 2.899 (4)             | 124                     |

Symmetry code: (iv)  $-x+1, y+1/2, -z+3/2$ .



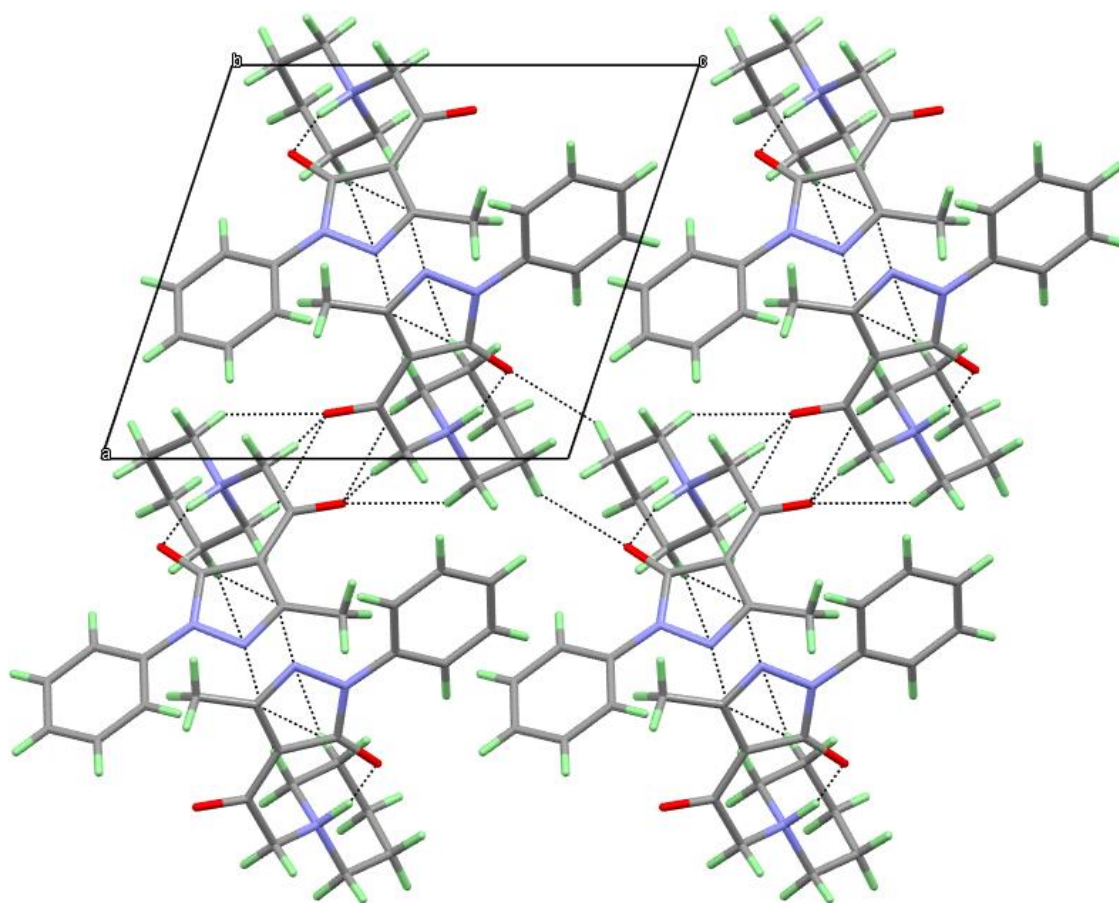

**Figure S1.** View along *b* of the three-dimensional arrangement of the molecules in the crystal structure of **4a**; hydrogen bonding and weak interactions are shown as dotted lines.  
12% O..H contacts

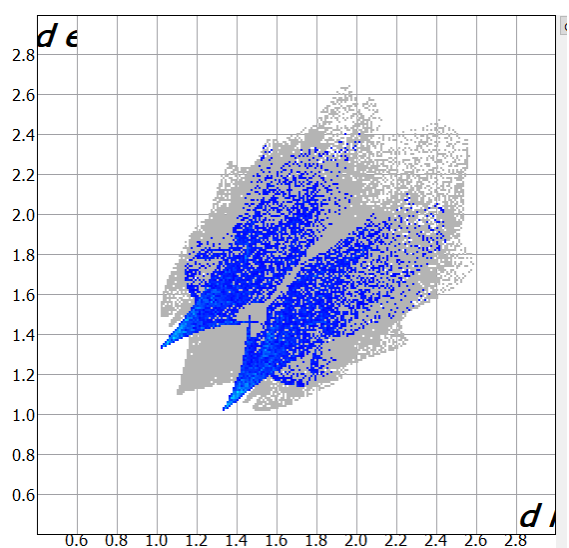

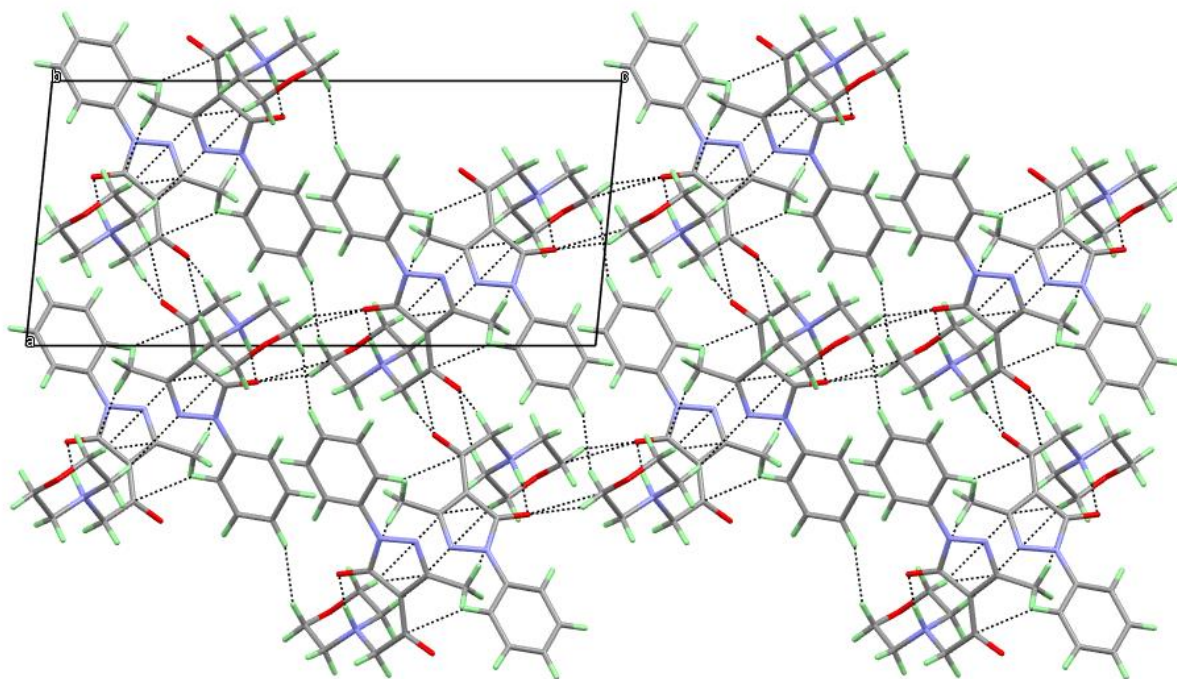

**Figure S2.** View along  $b$  of the three-dimensional arrangement of the molecules in the crystal structure of **4b**; hydrogen bonding and weak interactions are shown as dotted lines.

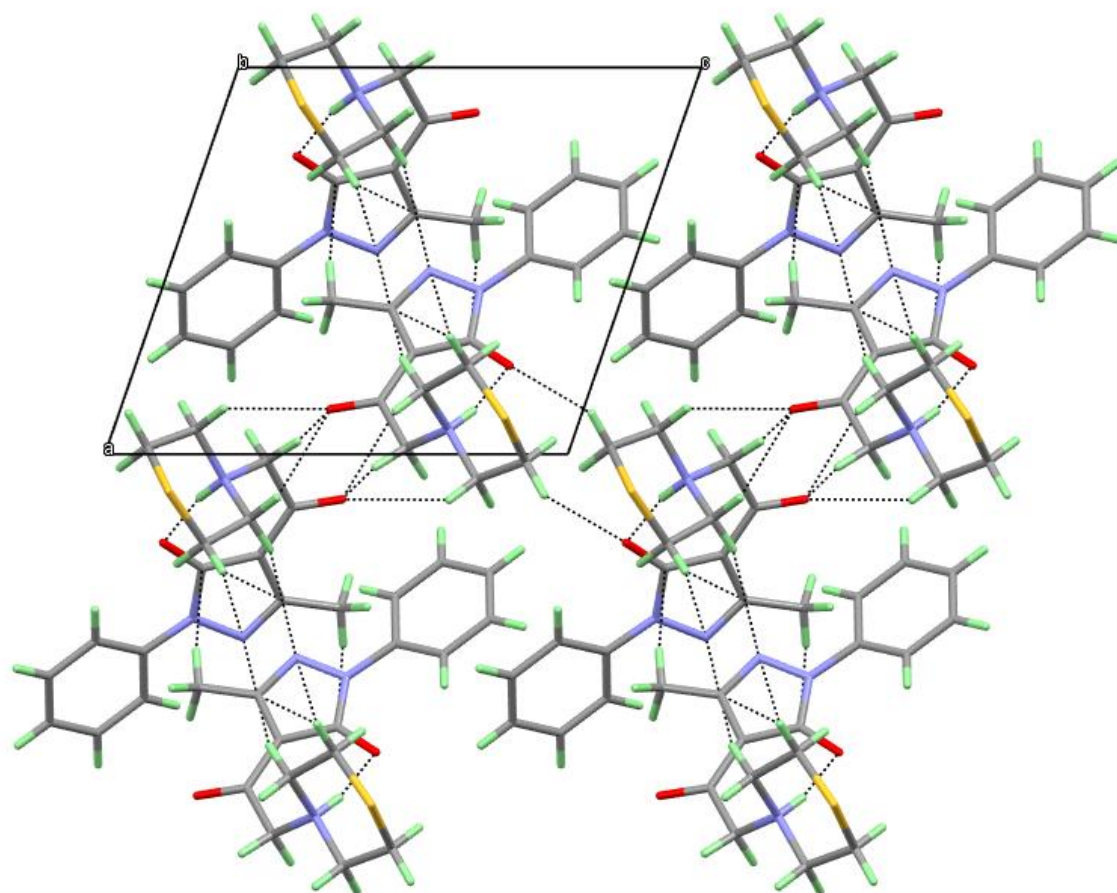

**Figure S3.** View along *b* of the three-dimensional arrangement of the molecules in the crystal structure of **4c**; hydrogen bonding and weak interactions are shown as dotted lines.

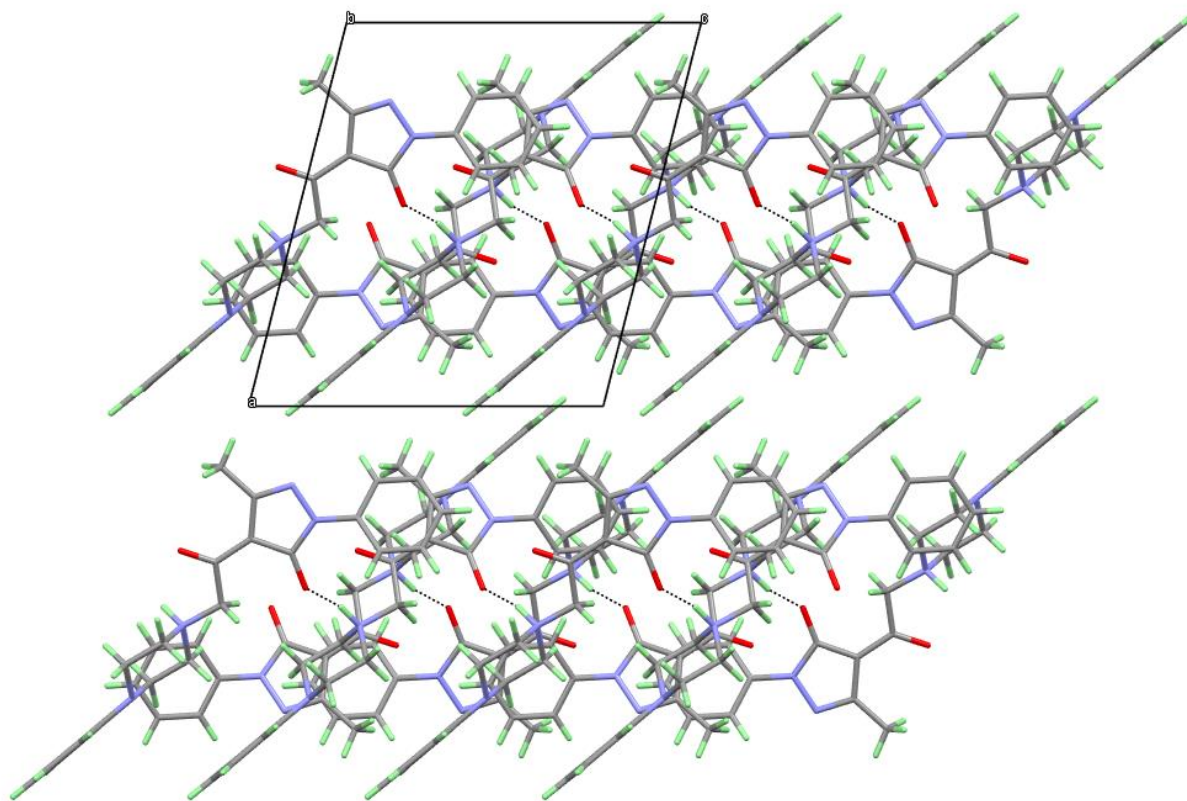

**Figure S4.** View along  $b$  of the three-dimensional arrangement of the molecules in the crystal structure of **4d**; hydrogen bonding and weak interactions are shown as dotted lines.

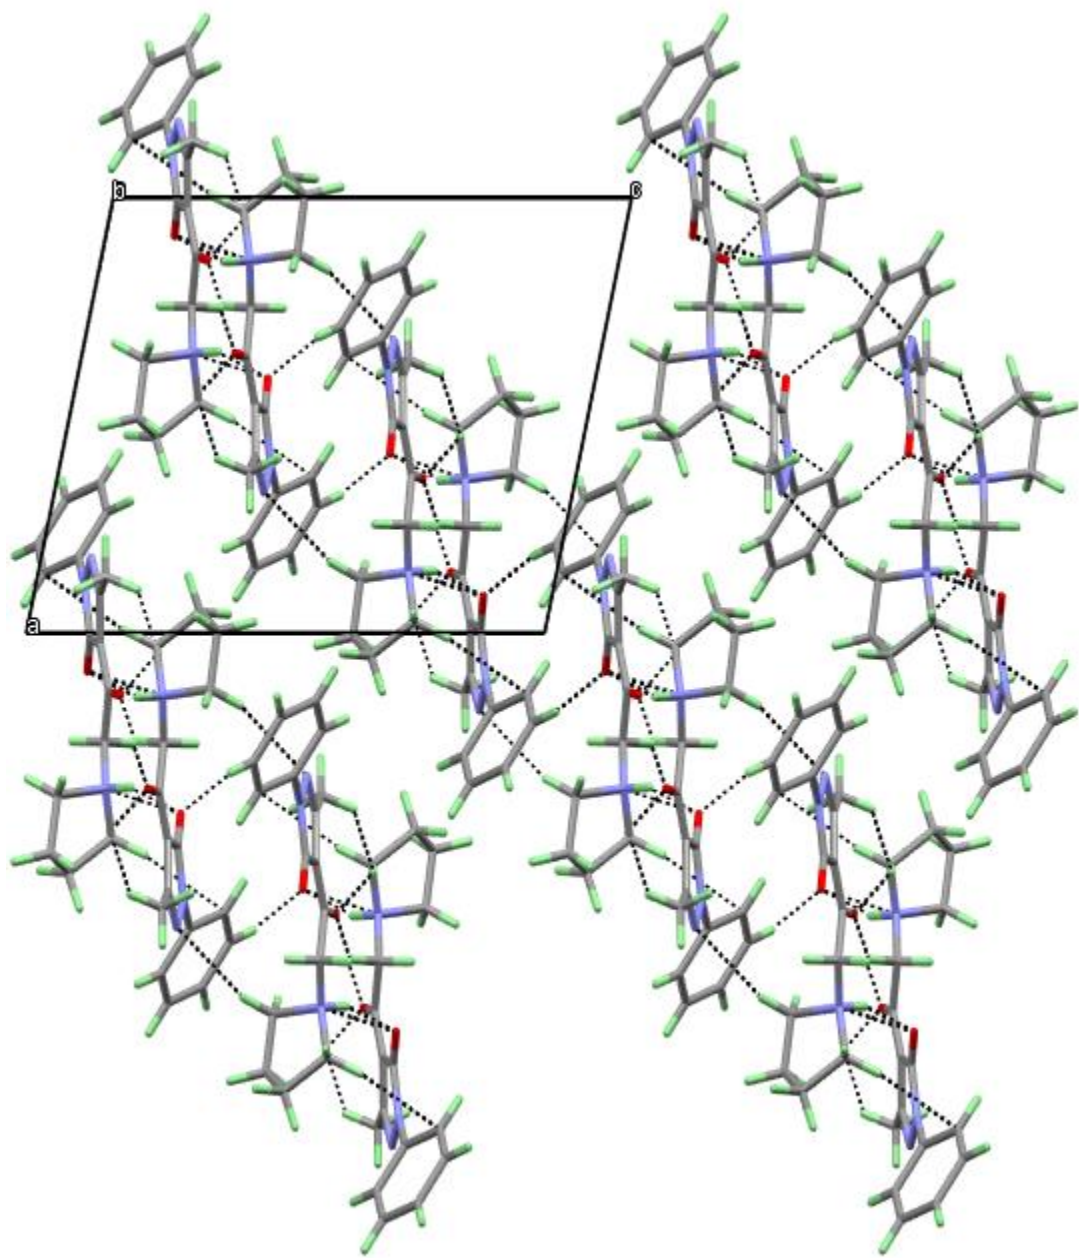

**Figure S5.** View along  $b$  of the three-dimensional arrangement of the molecules in the crystal structure of **4e**; hydrogen bonding and weak interactions are shown as dotted lines.

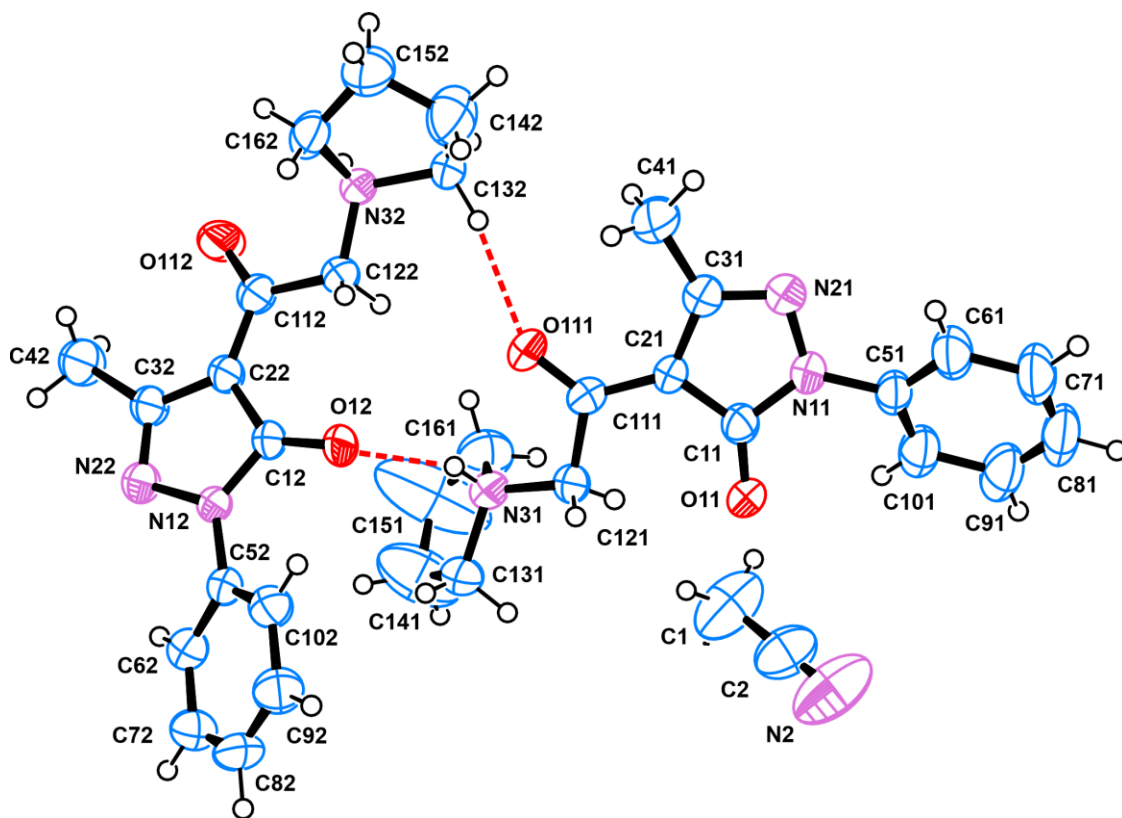

**Figure S6.** ORTEP view of **4e solvate** (with acetonitrile in the ASU).

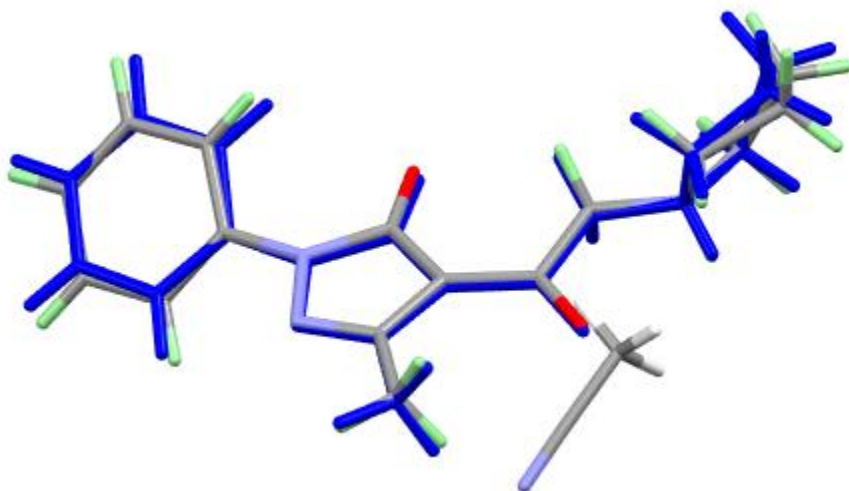

**Figure S7.** Overlay of the molecules from of compound **4e** with solvent (in blue/dark) and without solvent present in the crystal structure; the *rmsd* is 0.1605 Å ( The ACN is not considered).

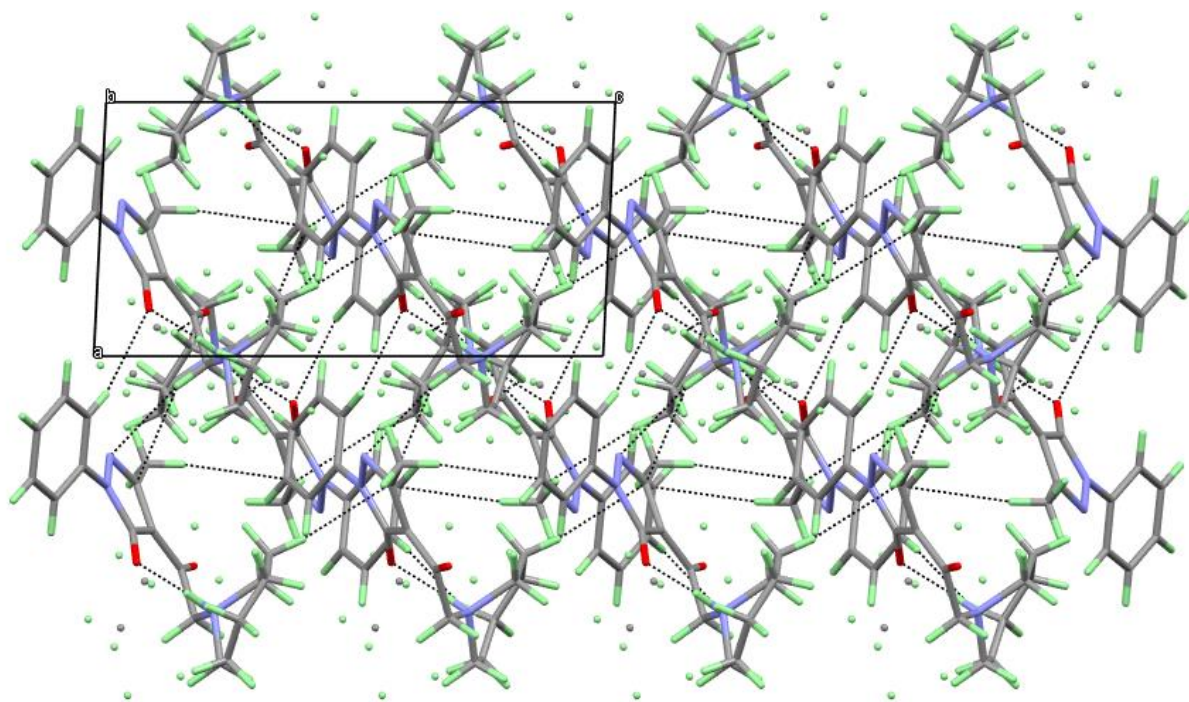

**Figure S8.** View along *b* of the three-dimensional arrangement of the molecules in the crystal structure of **4f**; hydrogen bonding and weak interactions are shown as dotted lines.

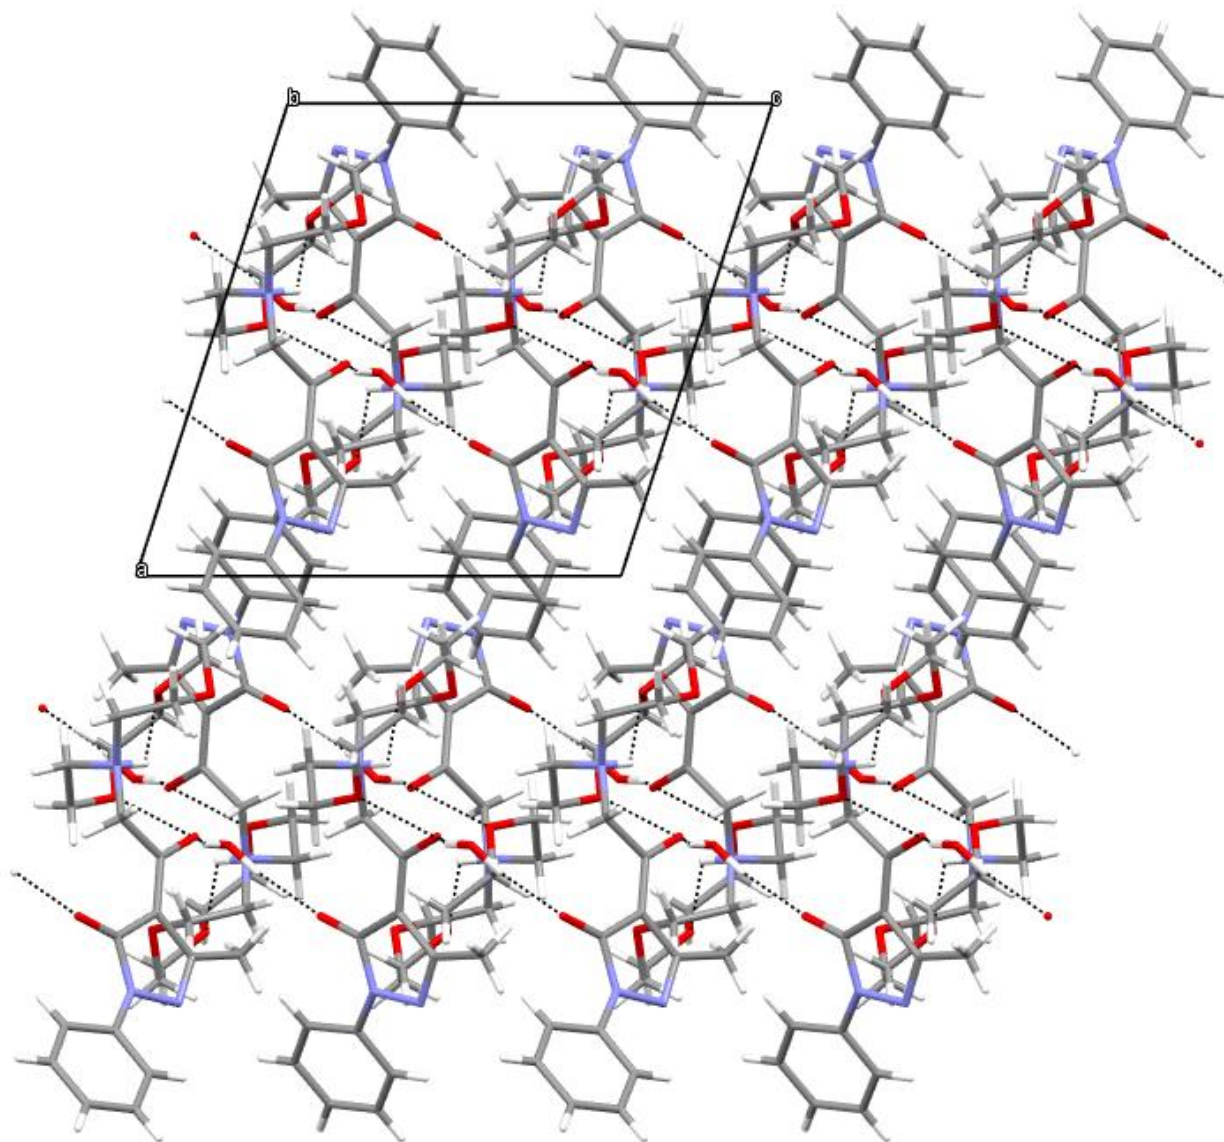

**Figure S9.** View along *b* of the three-dimensional arrangement of the molecules in the crystal structure of **4i**; hydrogen bonding are shown as dotted lines.

**Table S3.** Selected signals in the NMR spectra of ligands **4**.

| Compd.    | C=O    | Cq-5   | Cq-4   | Cq-3   | CH <sub>2</sub> -bridge |                |
|-----------|--------|--------|--------|--------|-------------------------|----------------|
|           |        |        |        |        | <sup>13</sup> C         | <sup>1</sup> H |
| <b>4a</b> | 182.69 | 163.45 | 103.97 | 151.30 | 66.47                   | 3.659          |



|           |        |        |        |        |       |       |
|-----------|--------|--------|--------|--------|-------|-------|
| <b>4b</b> | 184.39 | 160.56 | 104.07 | 151.47 | 67.27 | 3.611 |
| <b>4c</b> | 184.28 | 160.75 | 104.05 | 151.47 | 67.50 | 3.611 |
| <b>4d</b> | 184.23 | 161.09 | 104.12 | 151.49 | 66.77 | 3.671 |
| <b>4e</b> | 182.65 | 163.68 | 103.91 | 151.24 | 64.36 | 3.807 |
| <b>4f</b> | 182.17 | 161.70 | 104.12 | 151.36 | 66.36 | 3.771 |
| <b>4h</b> | 181.59 | 163.98 | 104.21 | 150.98 | 66.35 | 3.795 |
| <b>4i</b> | 180.53 | 165.02 | 103.17 | 150.52 | 61.94 | 4.083 |
| <b>4j</b> | 182.29 | 164.05 | 103.85 | 150.90 | 63.54 | 3.996 |

# APPENDIX

## NMR spectra

### Compound 4a

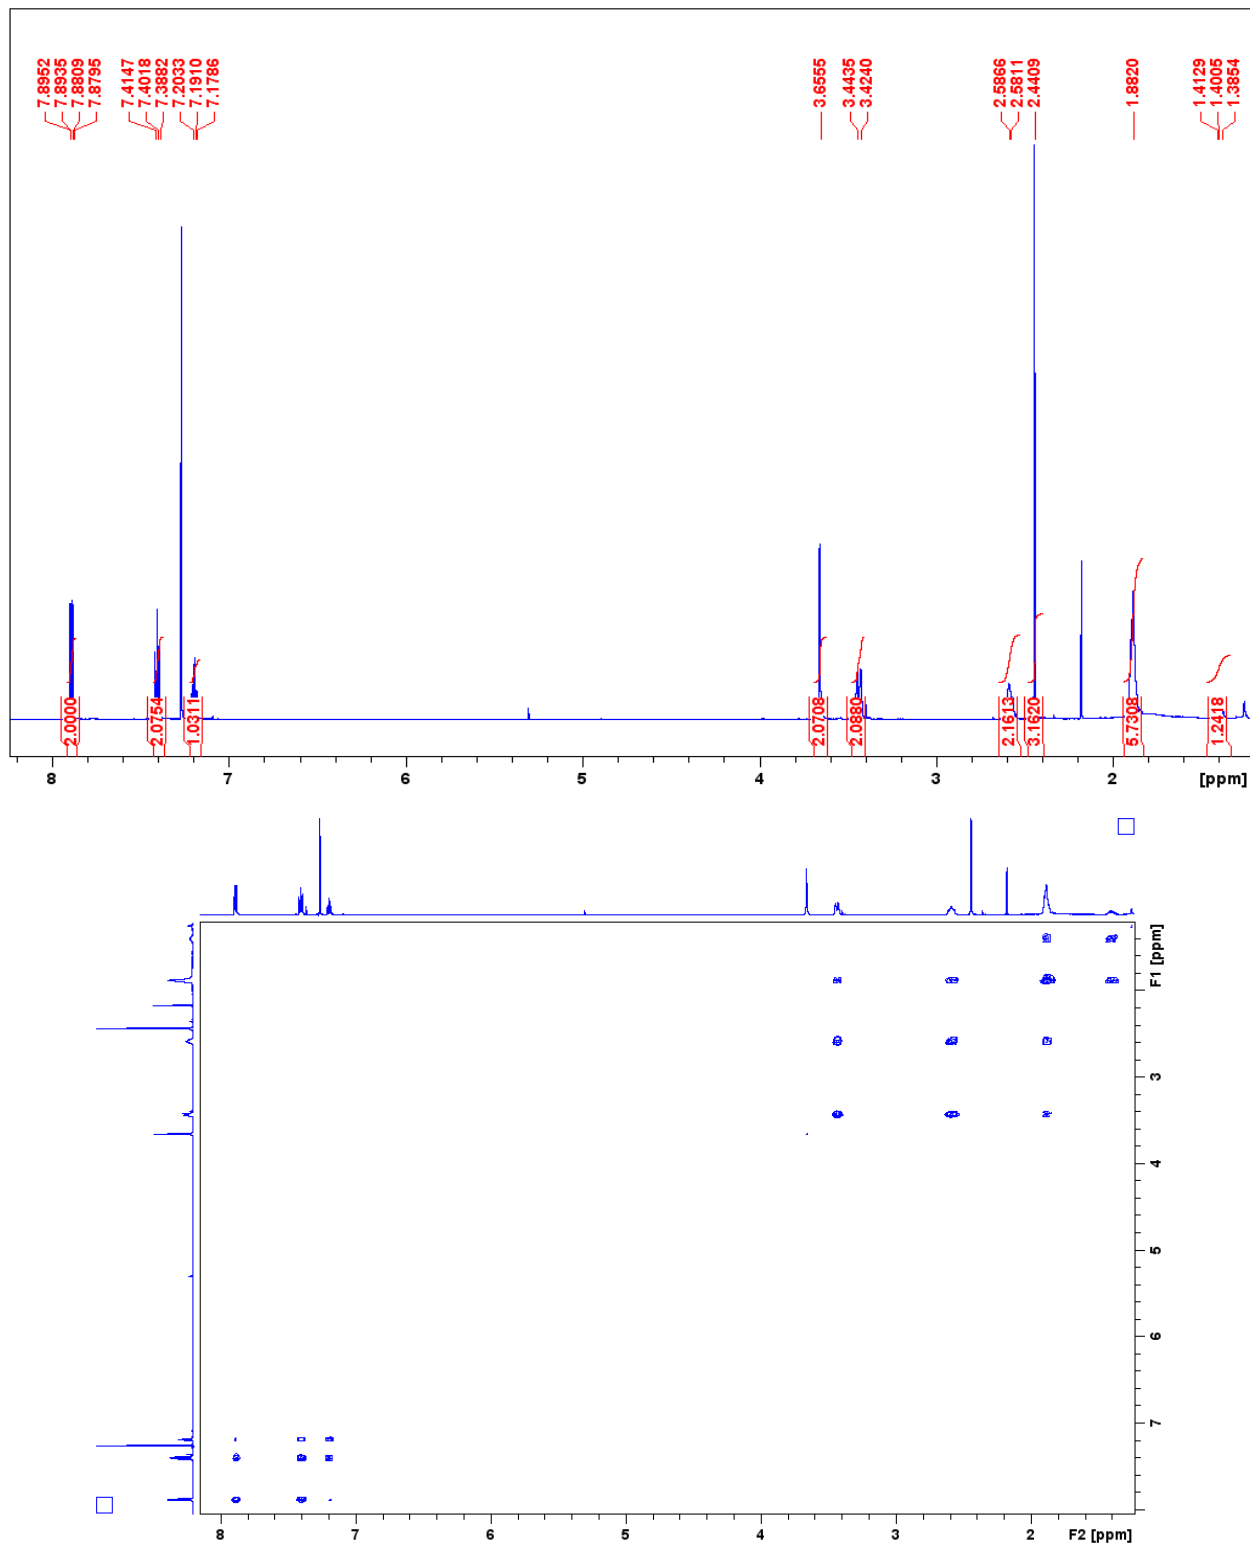

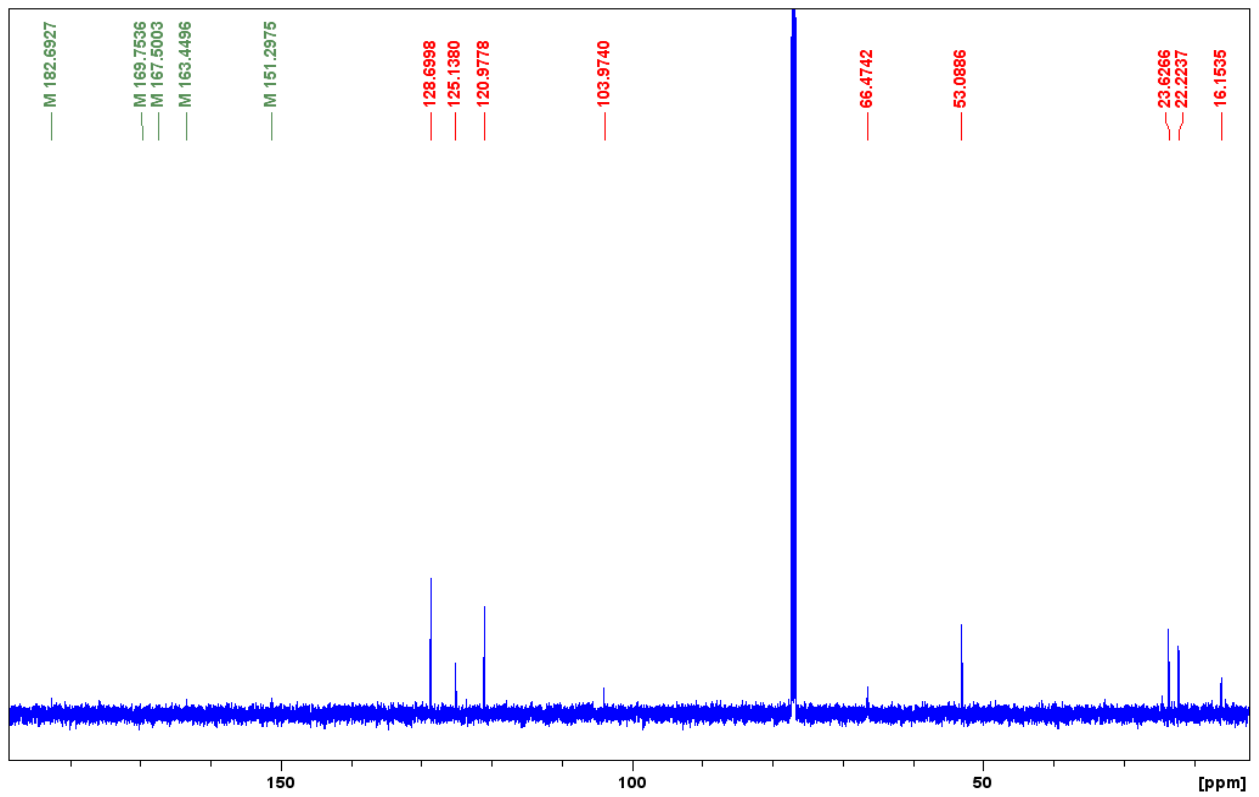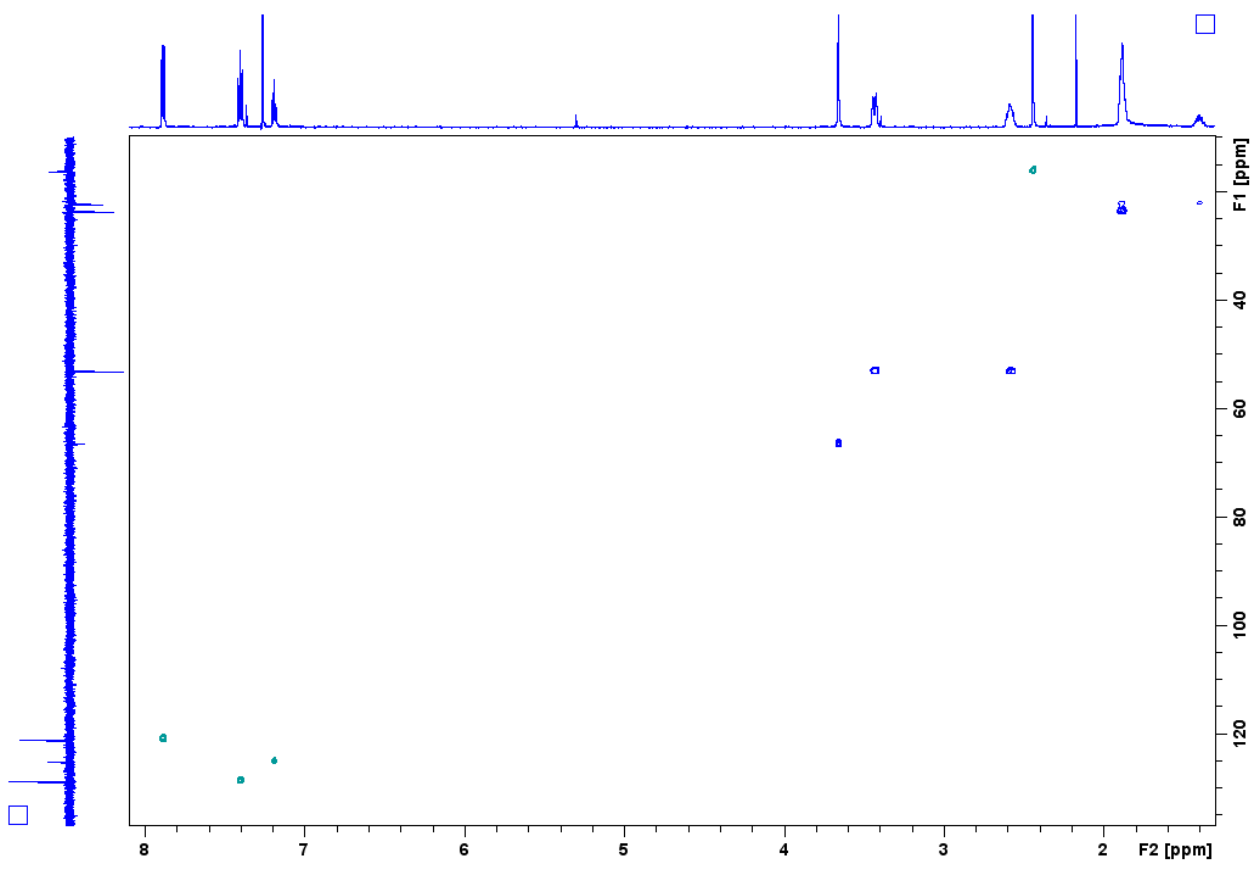

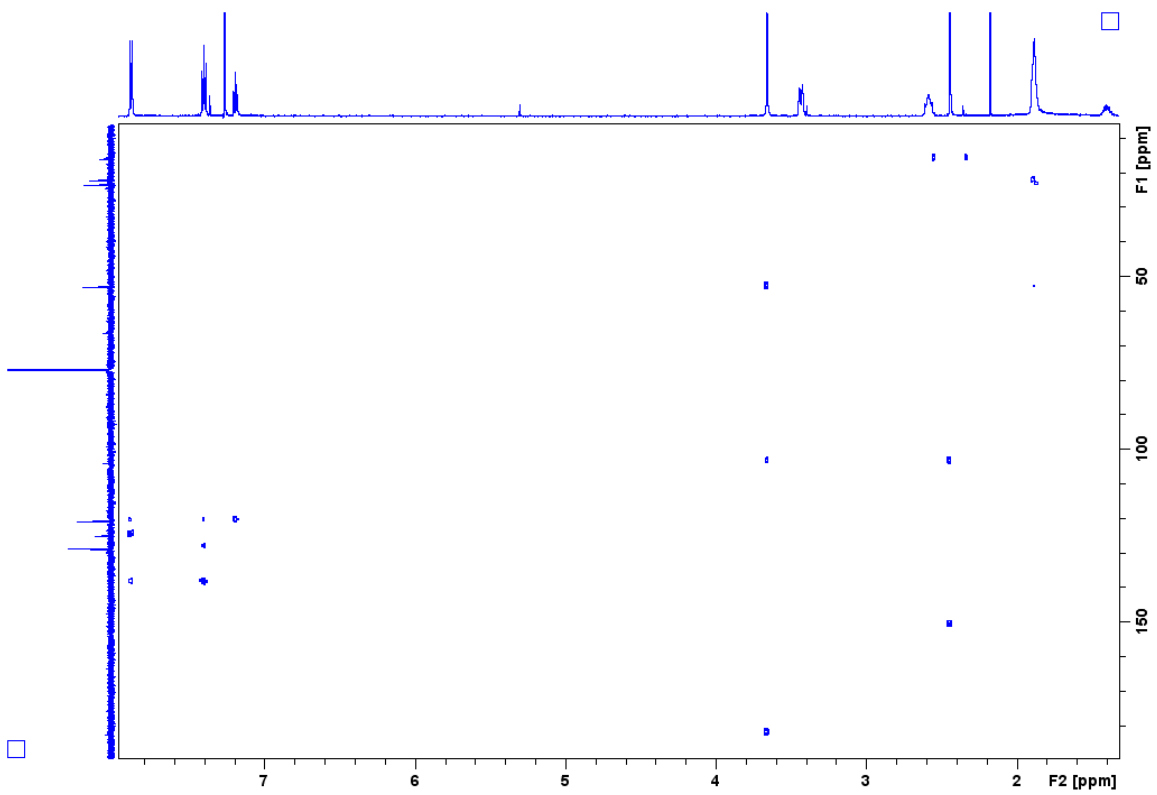

Compound **4b**

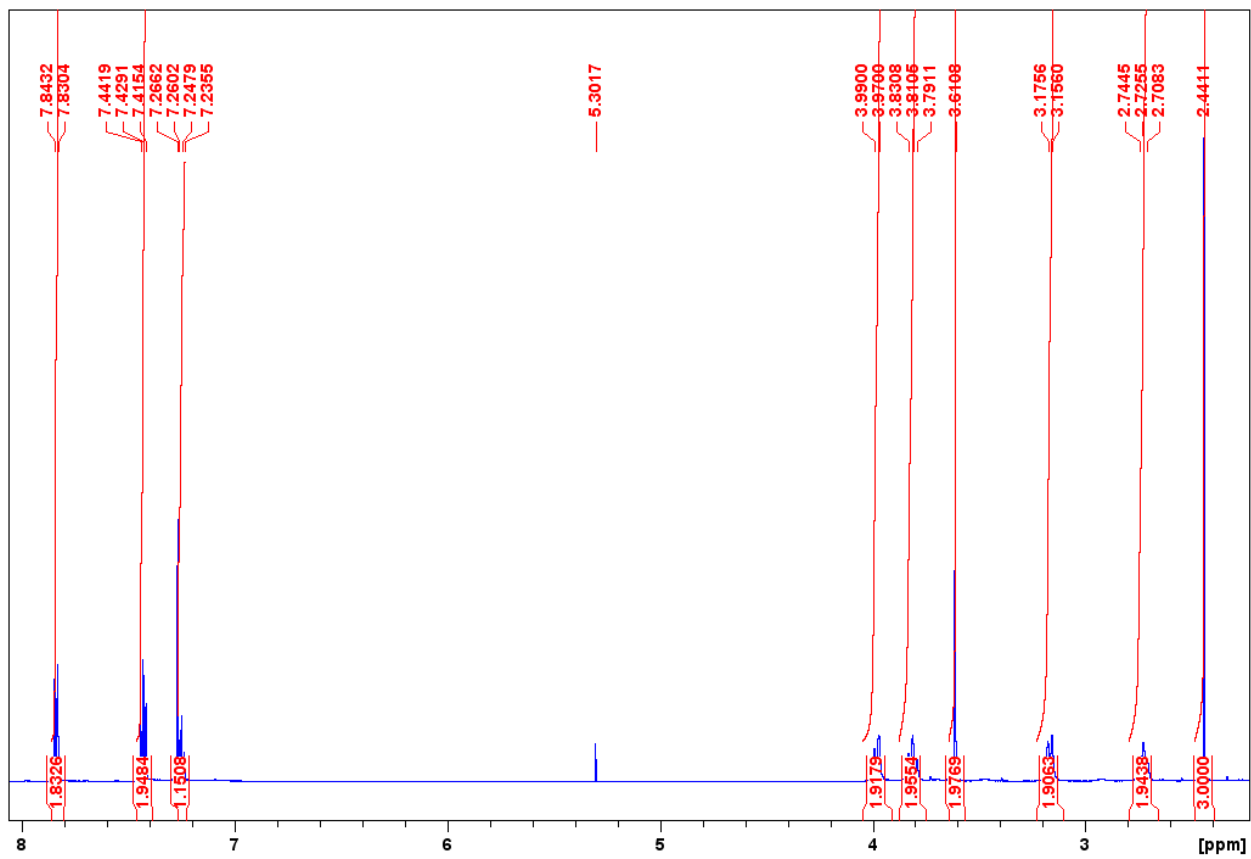

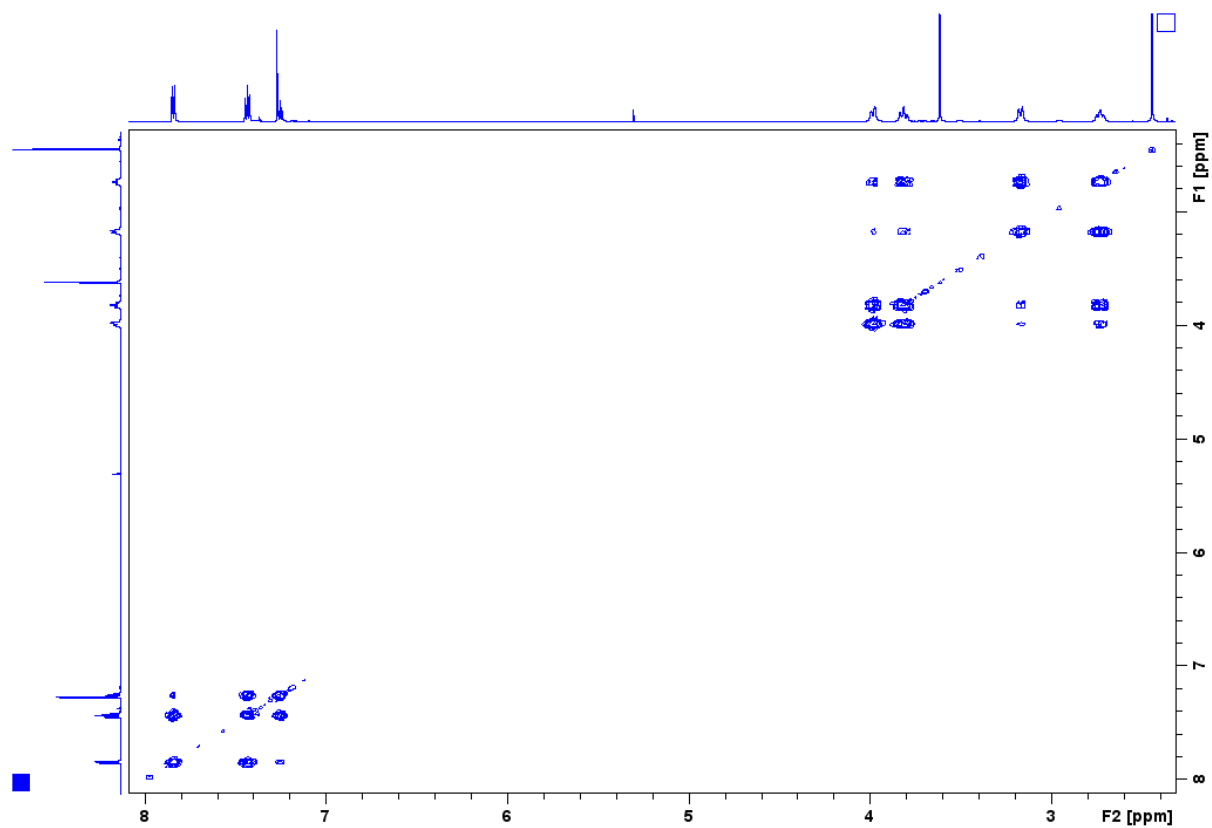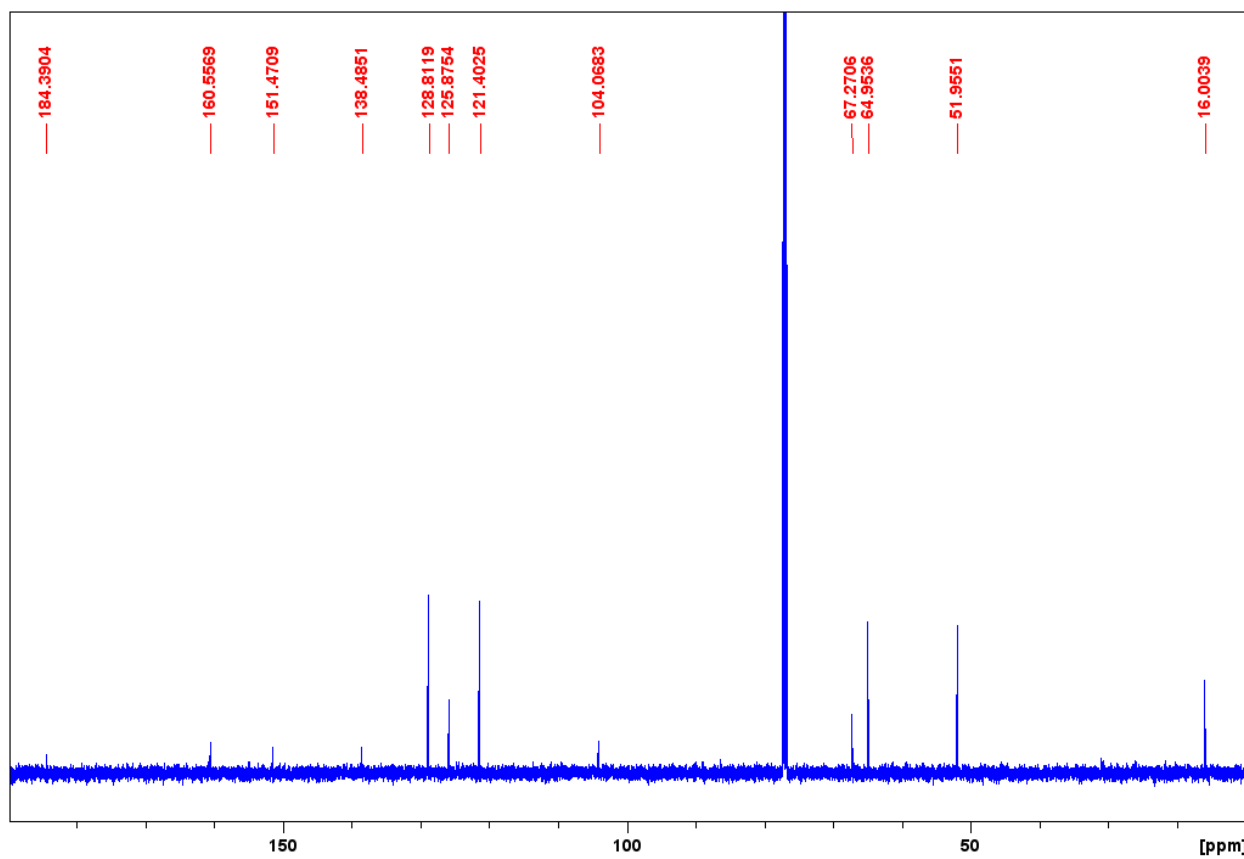

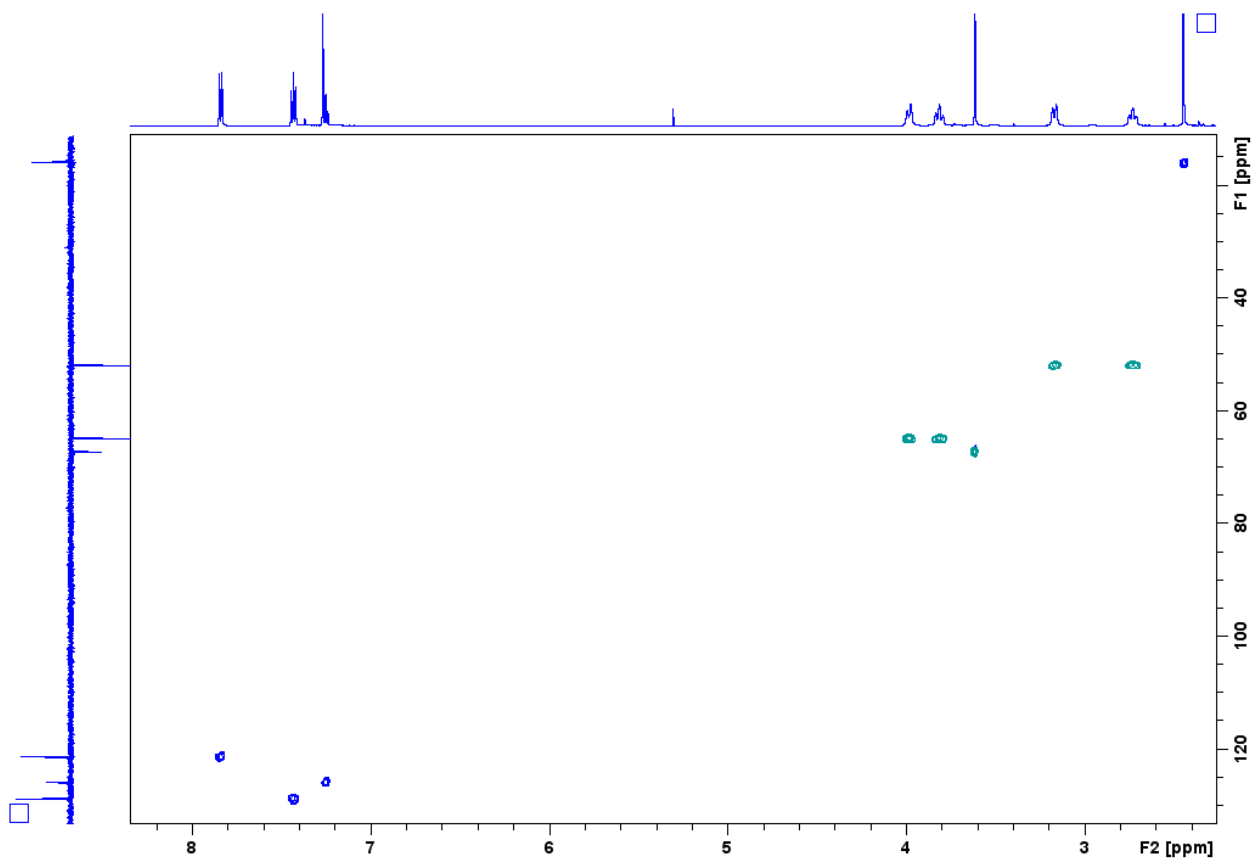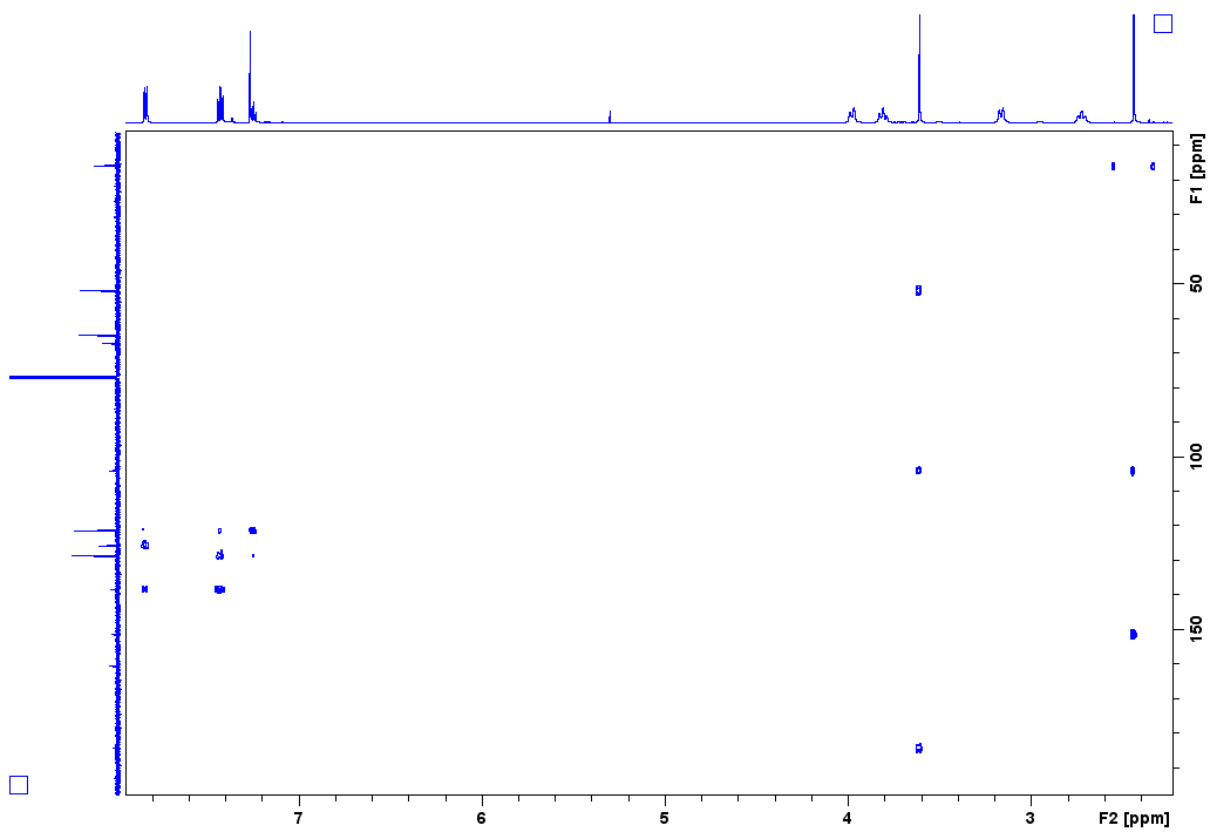

Compound 4c

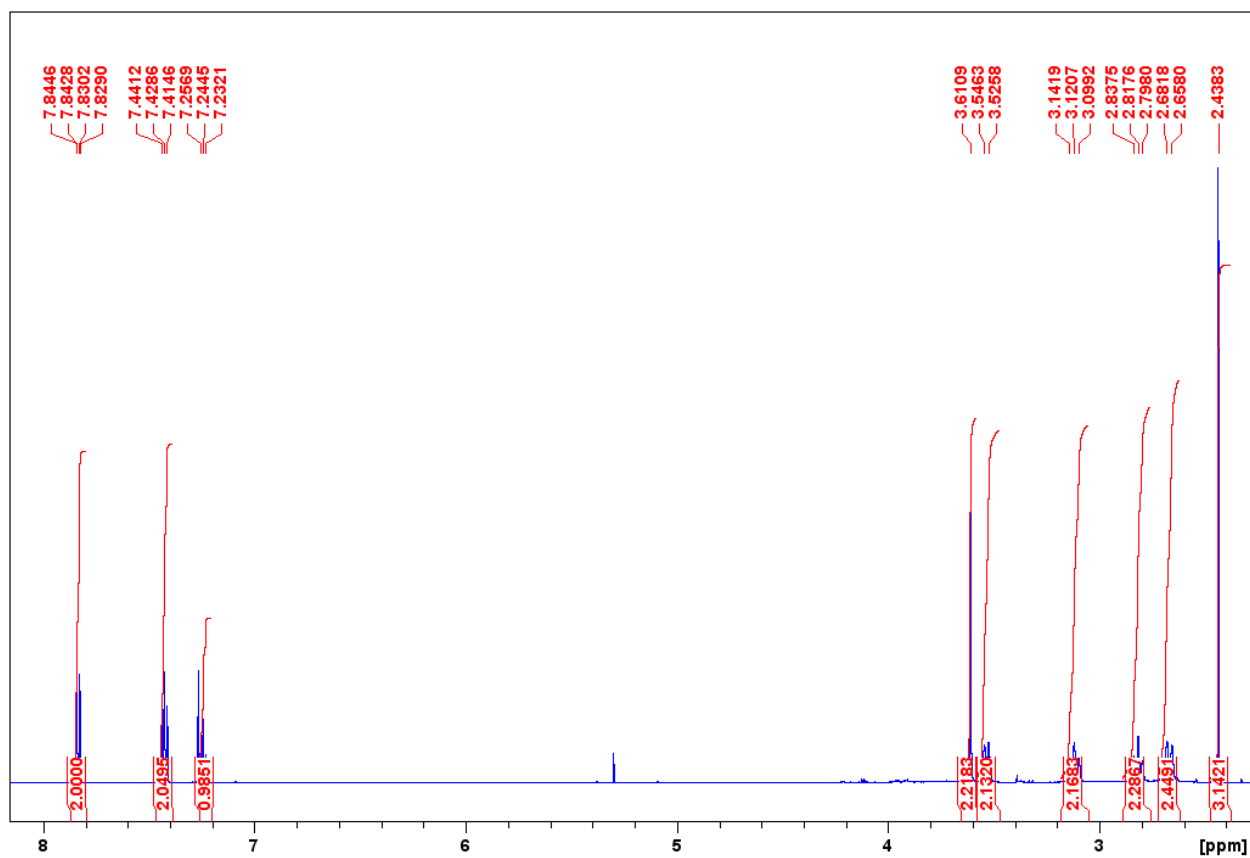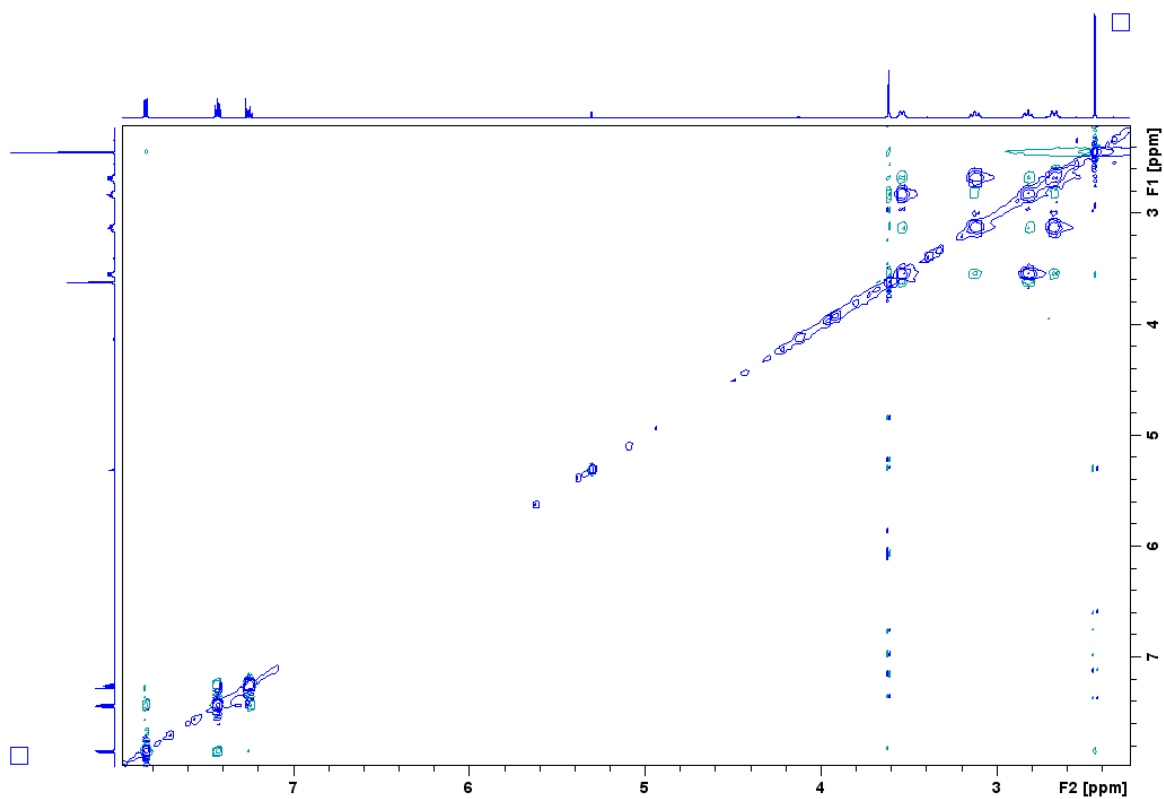

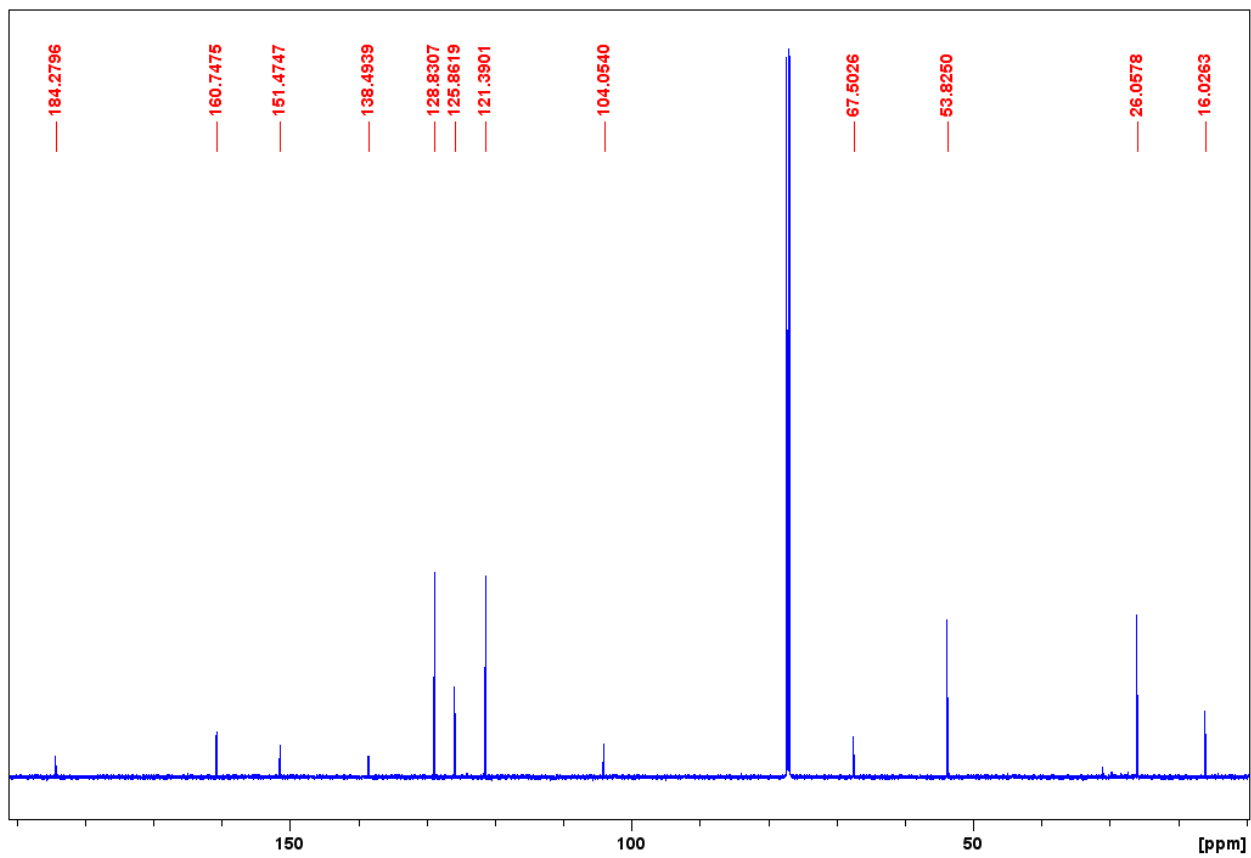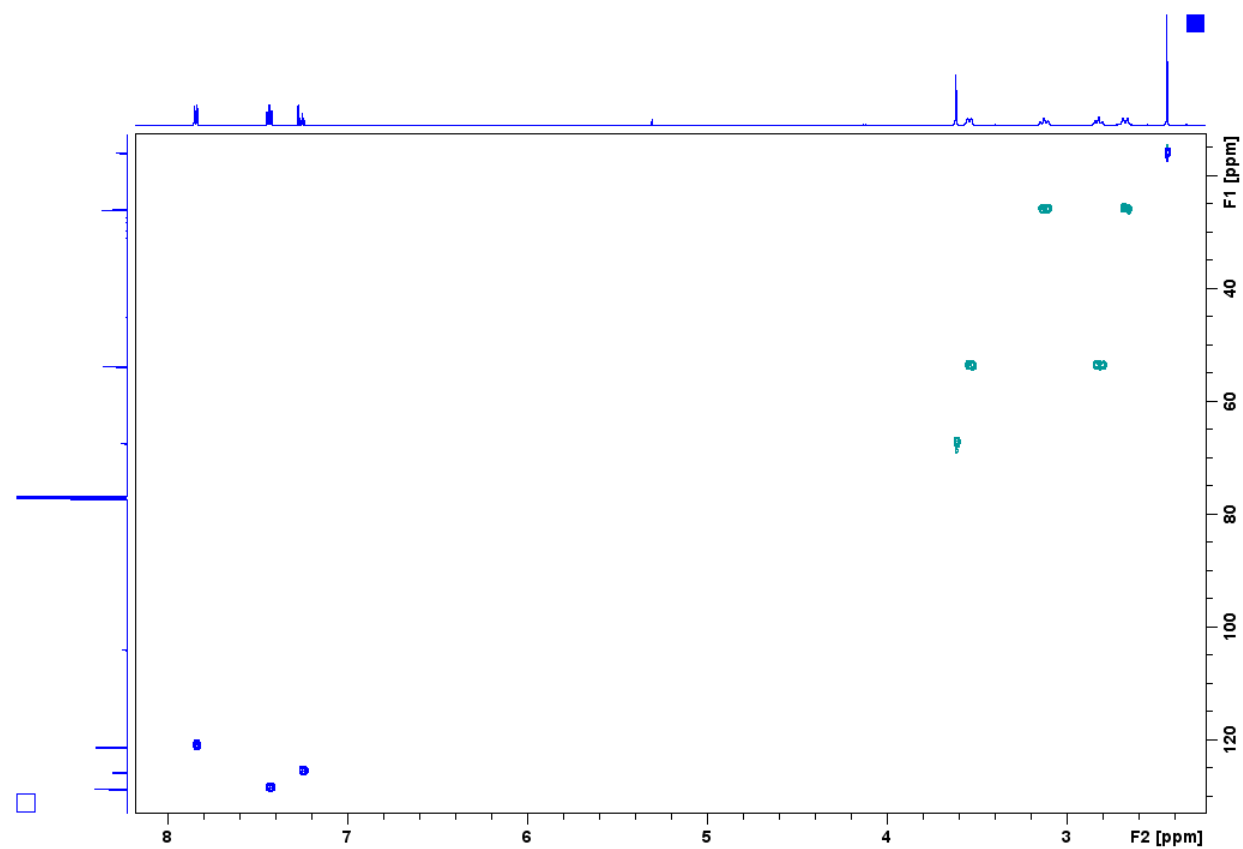



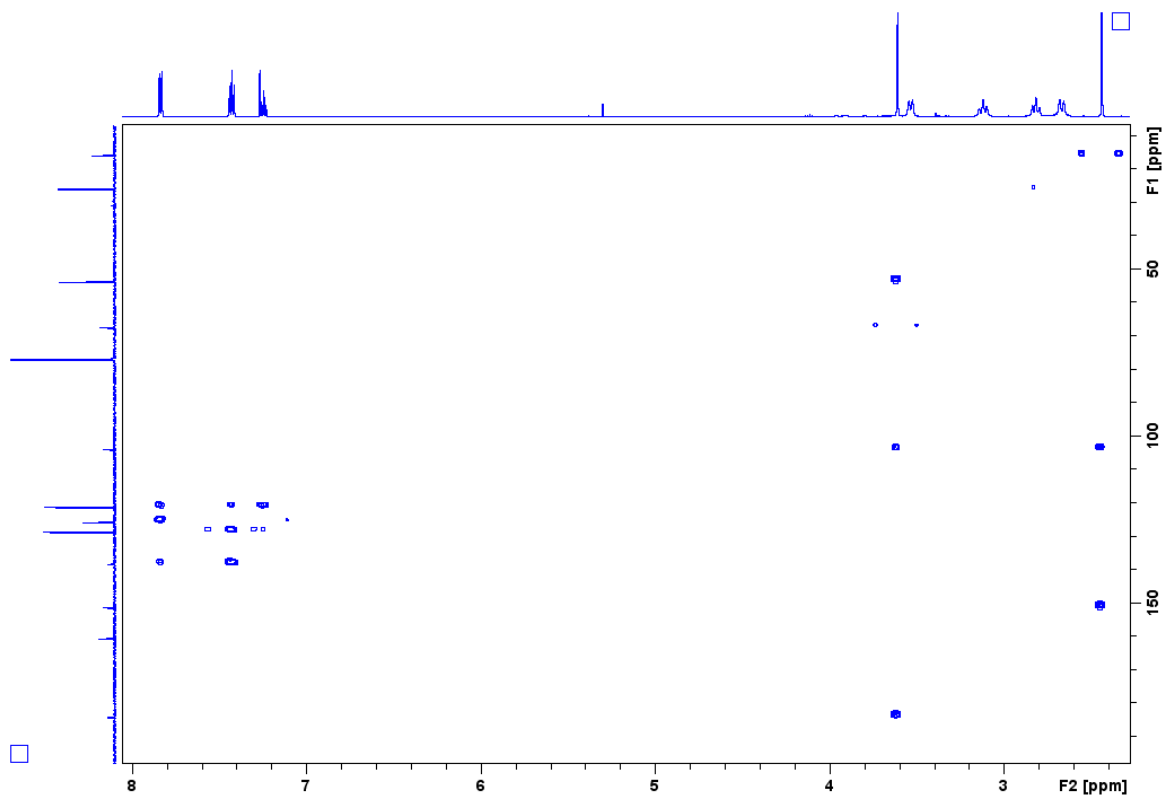

Compound 4d

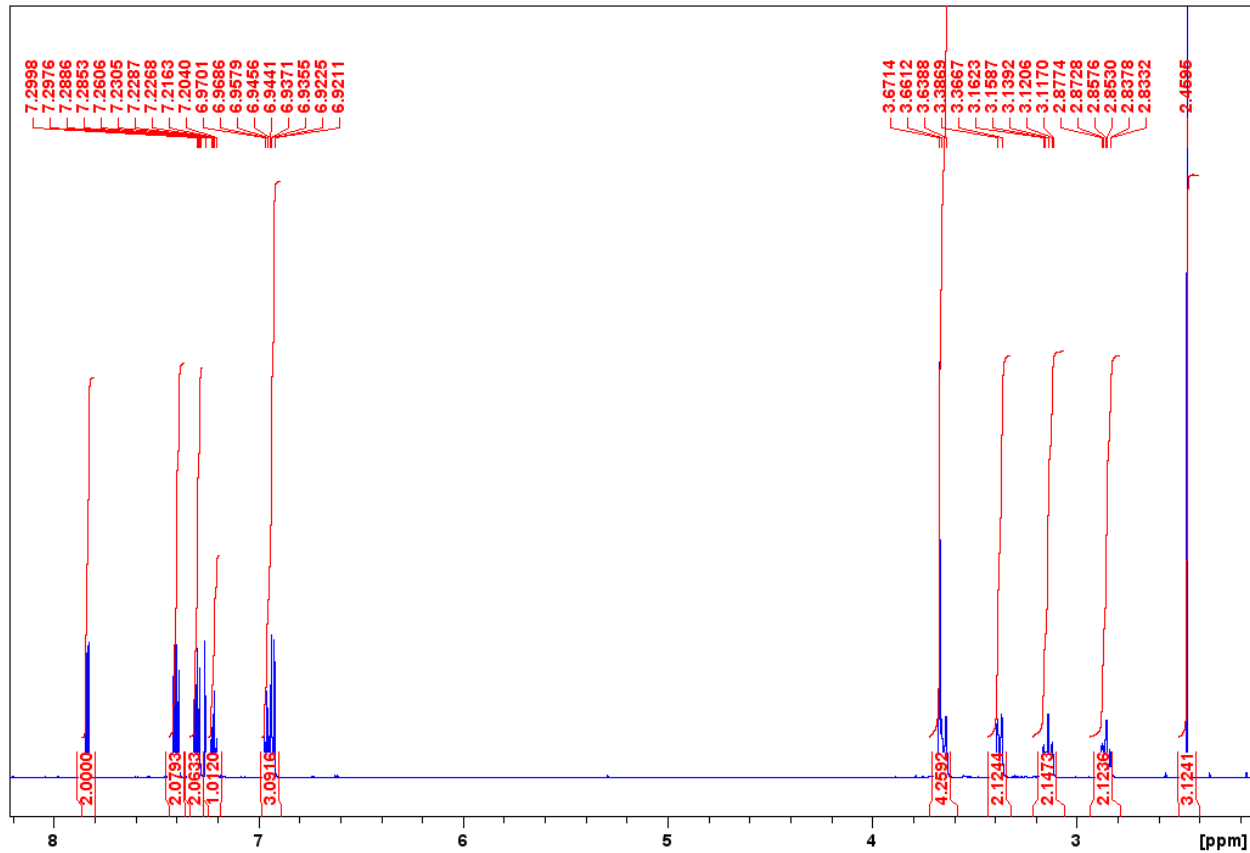

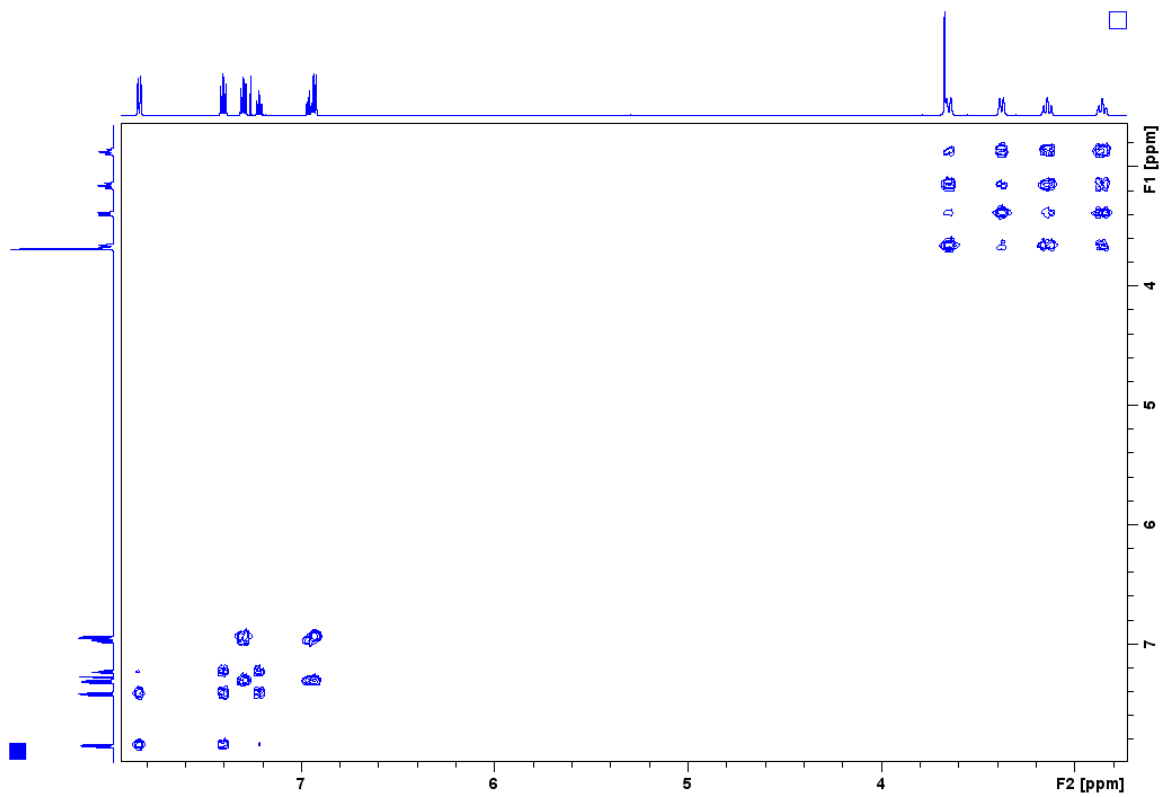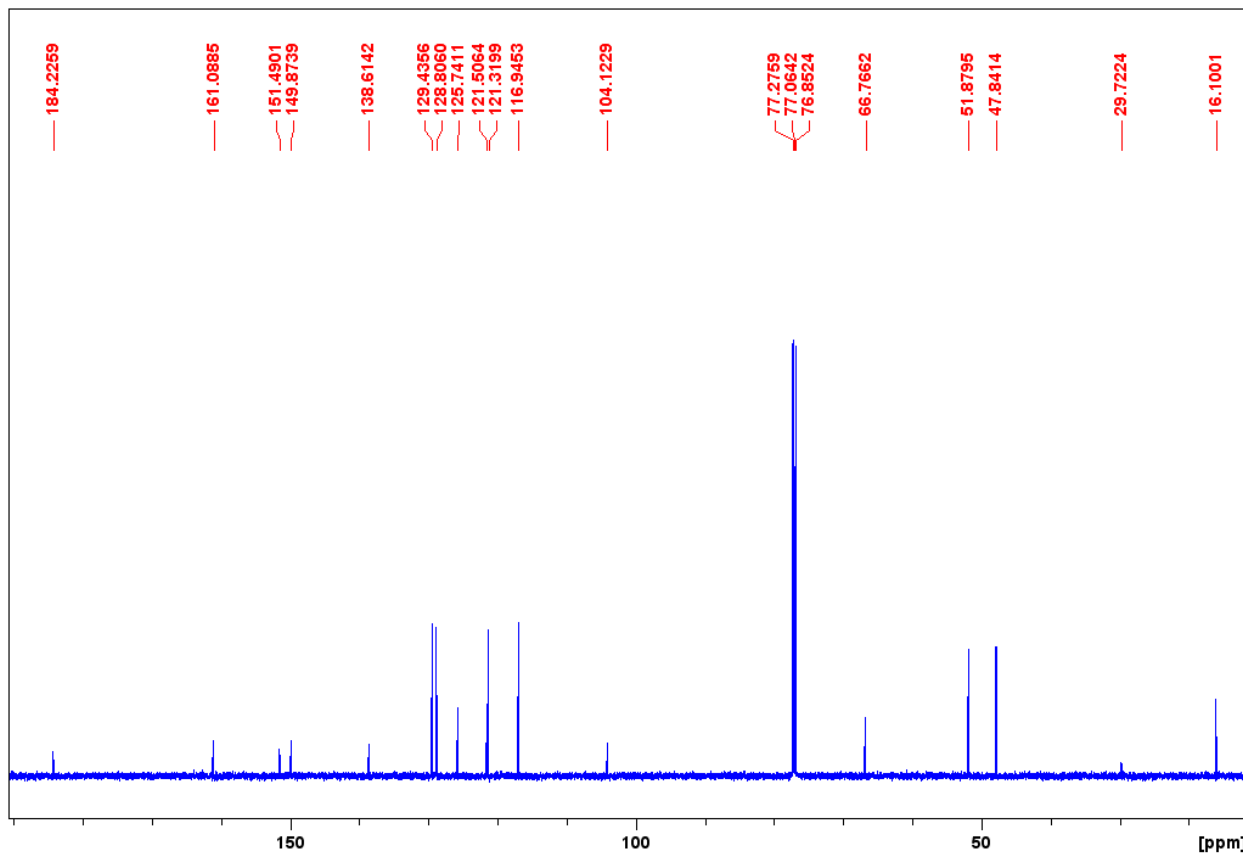

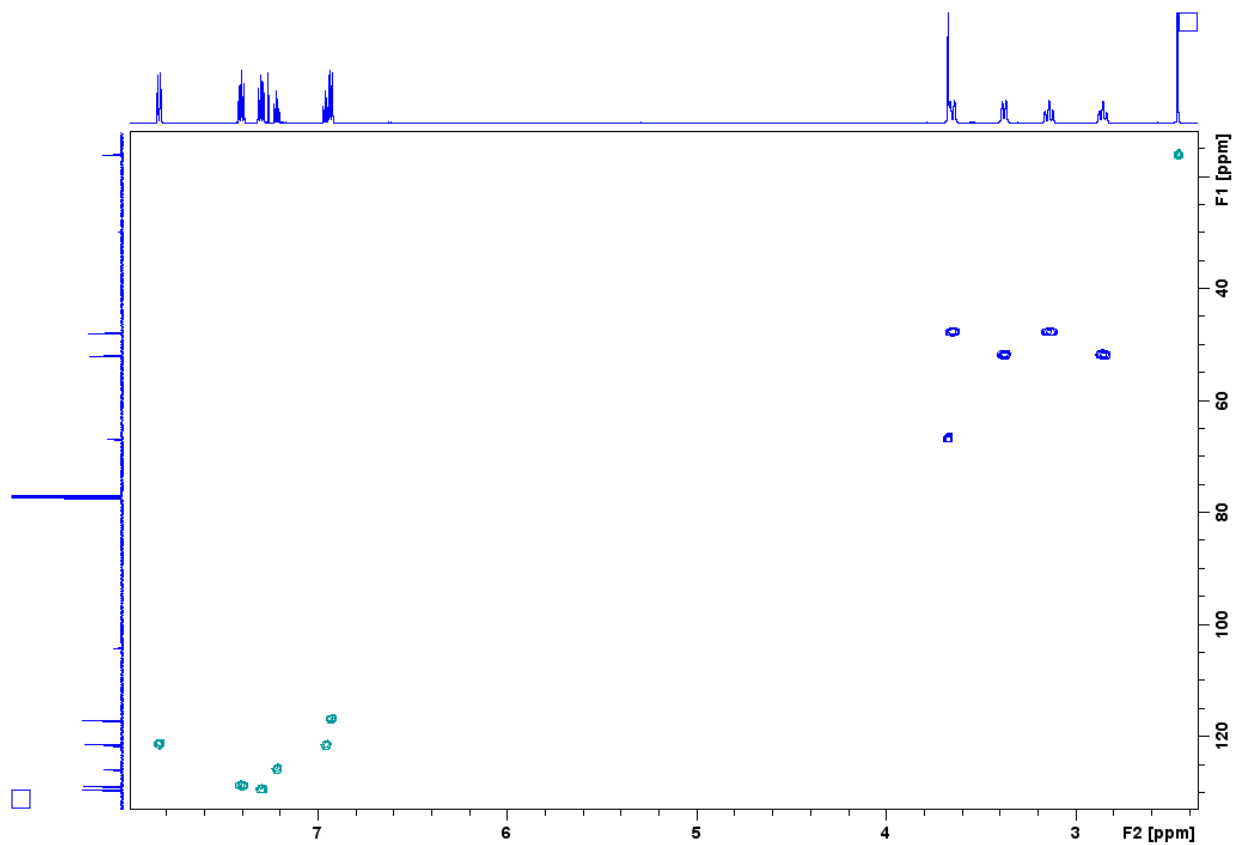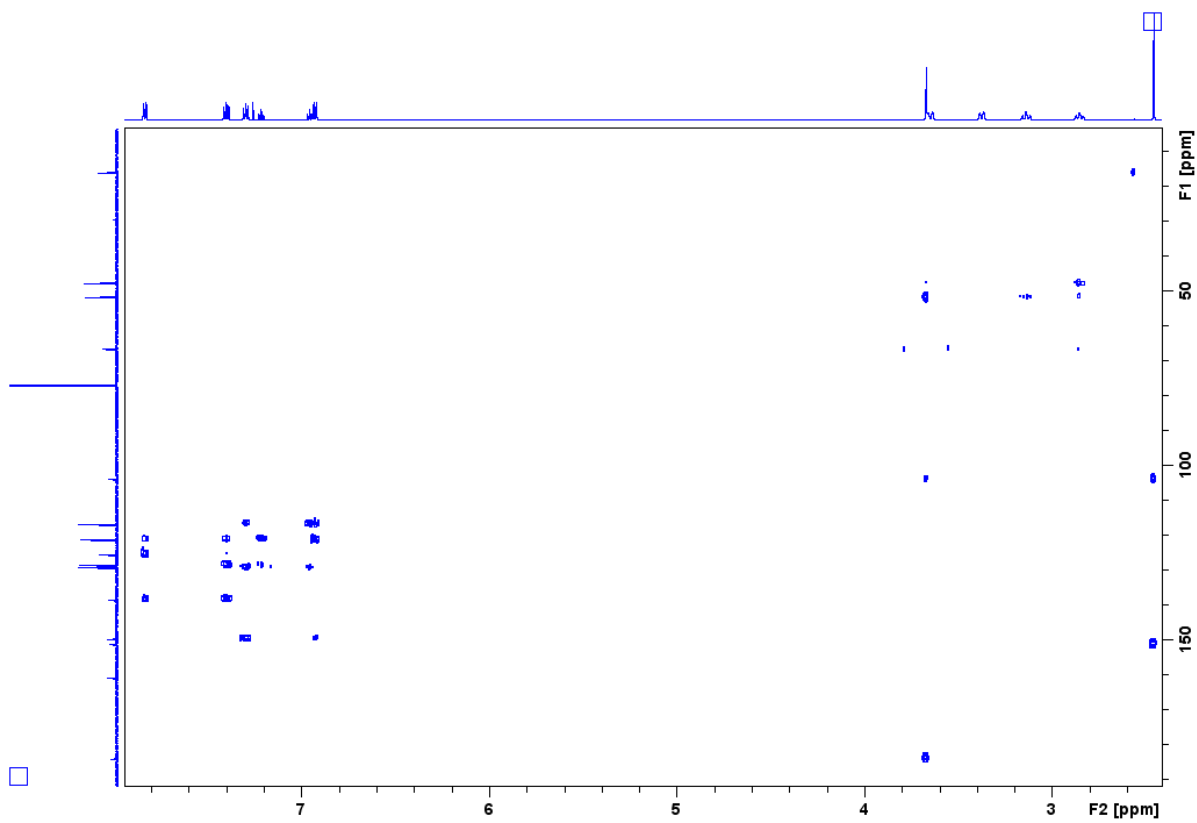

Compound 4e

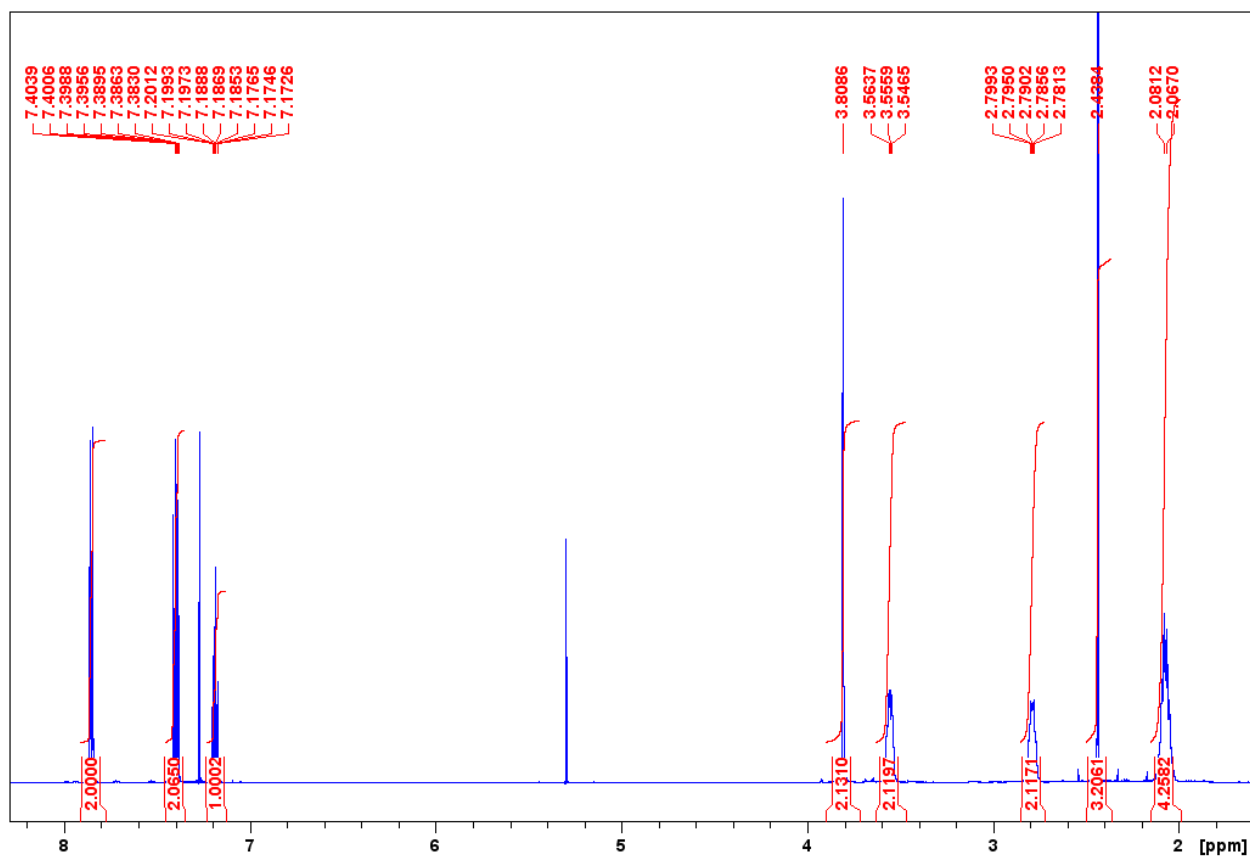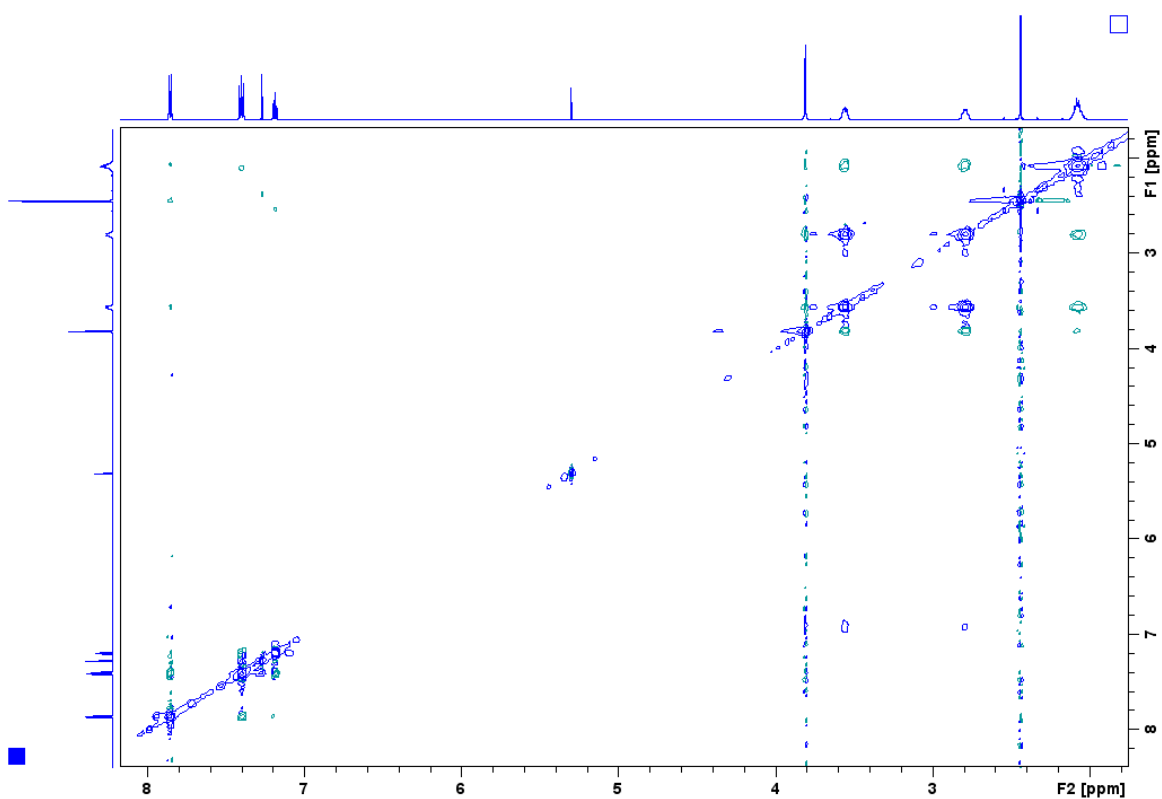

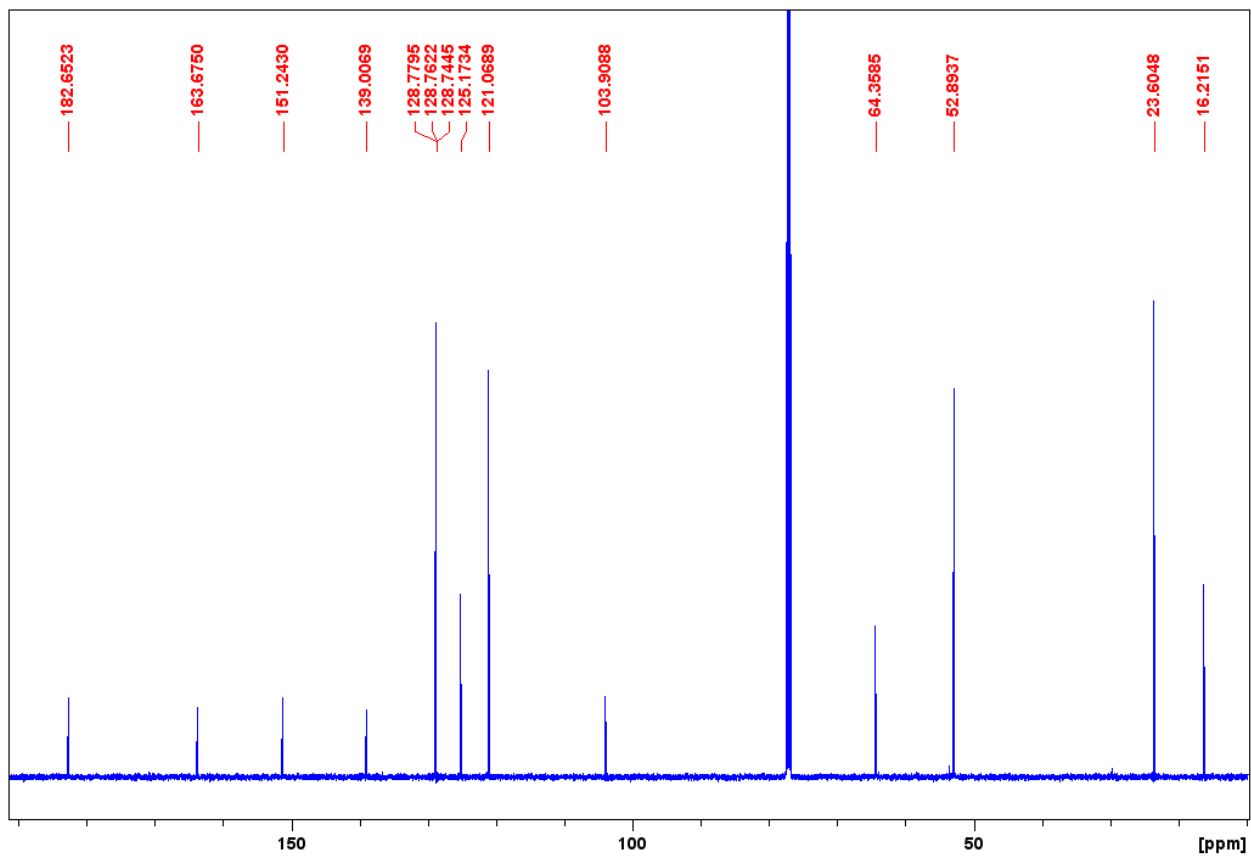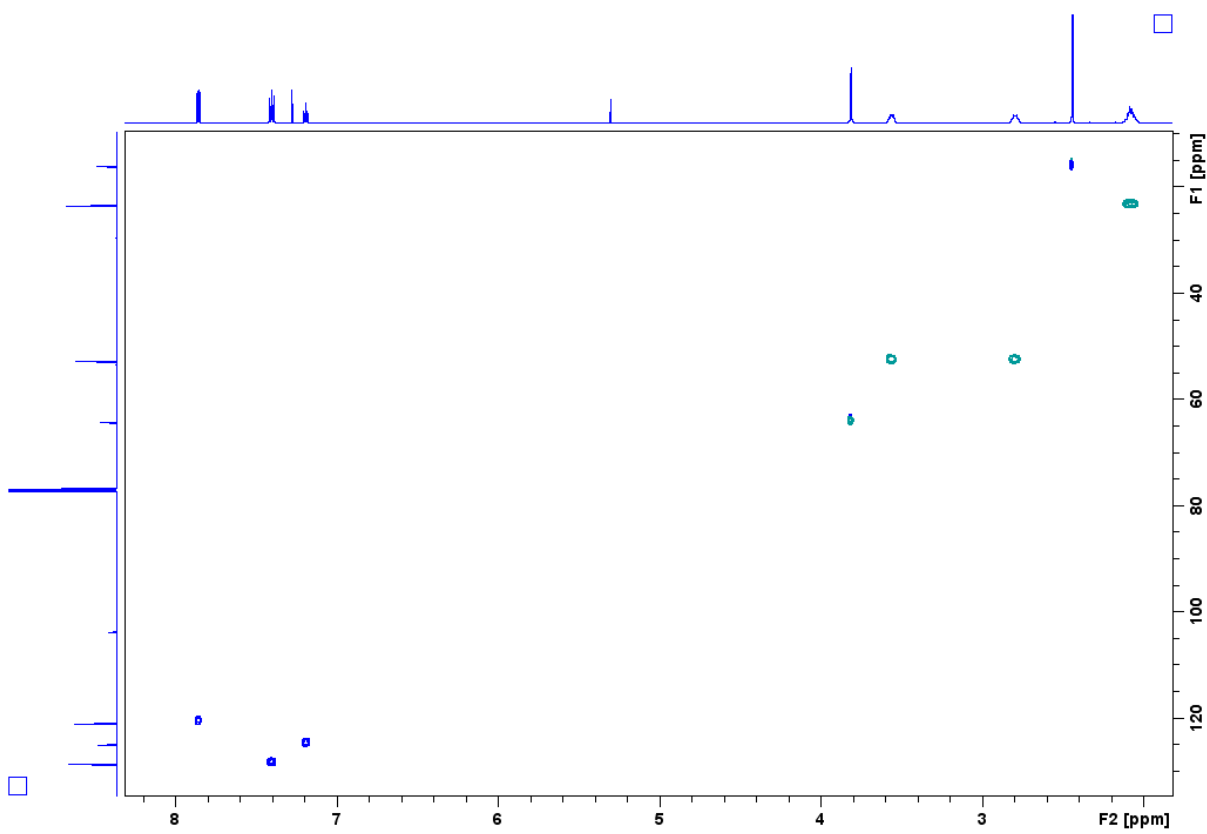

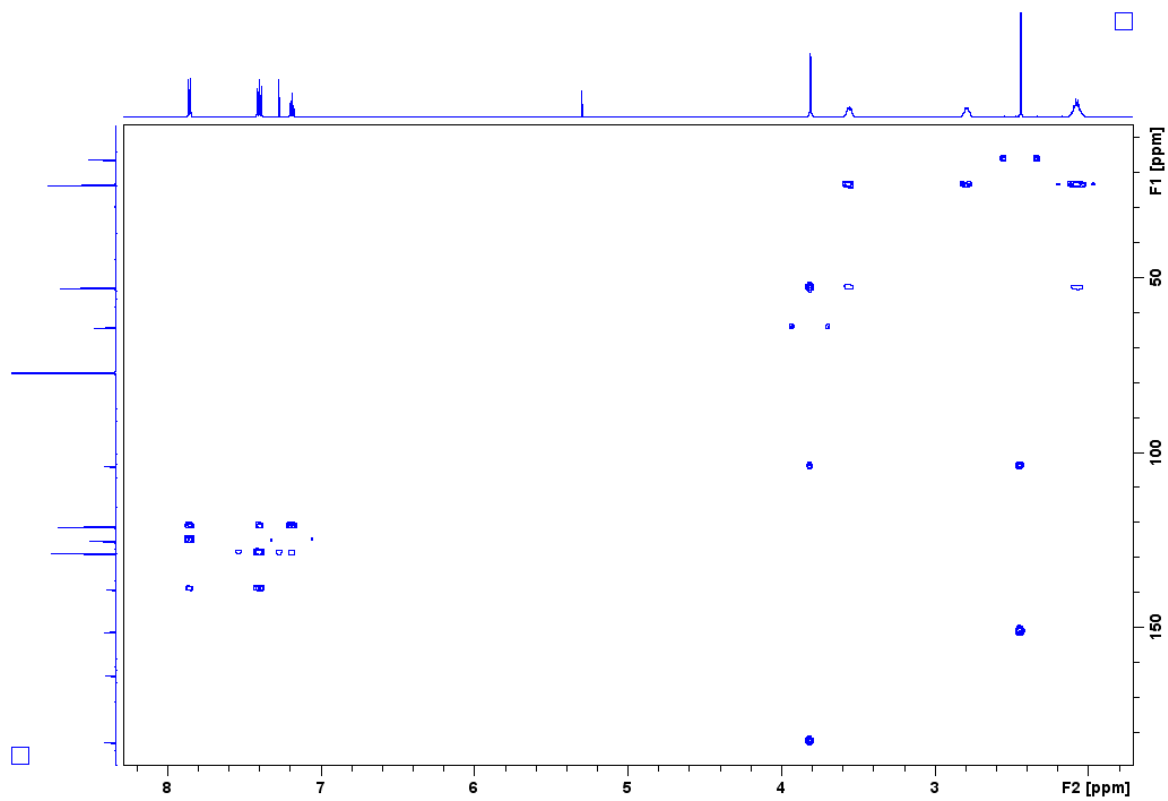

Compound **4f**

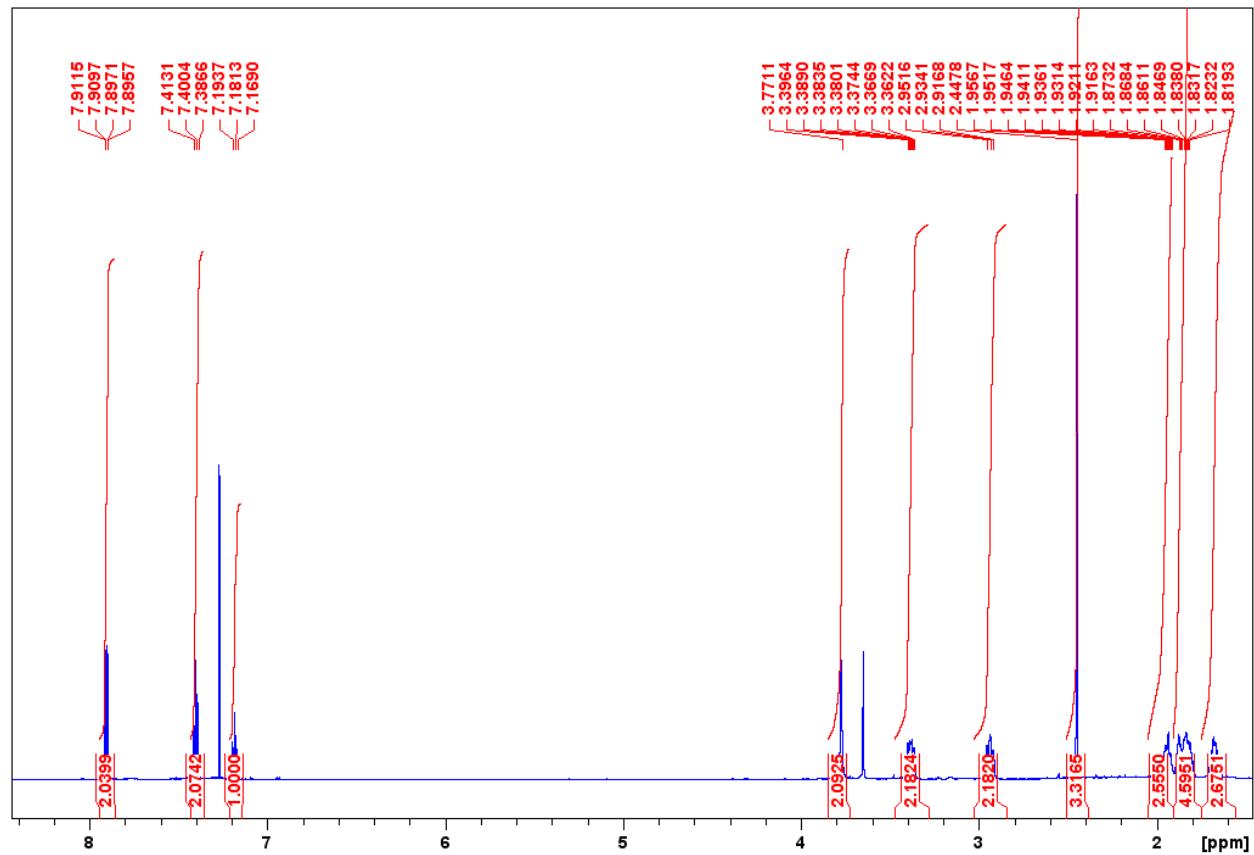

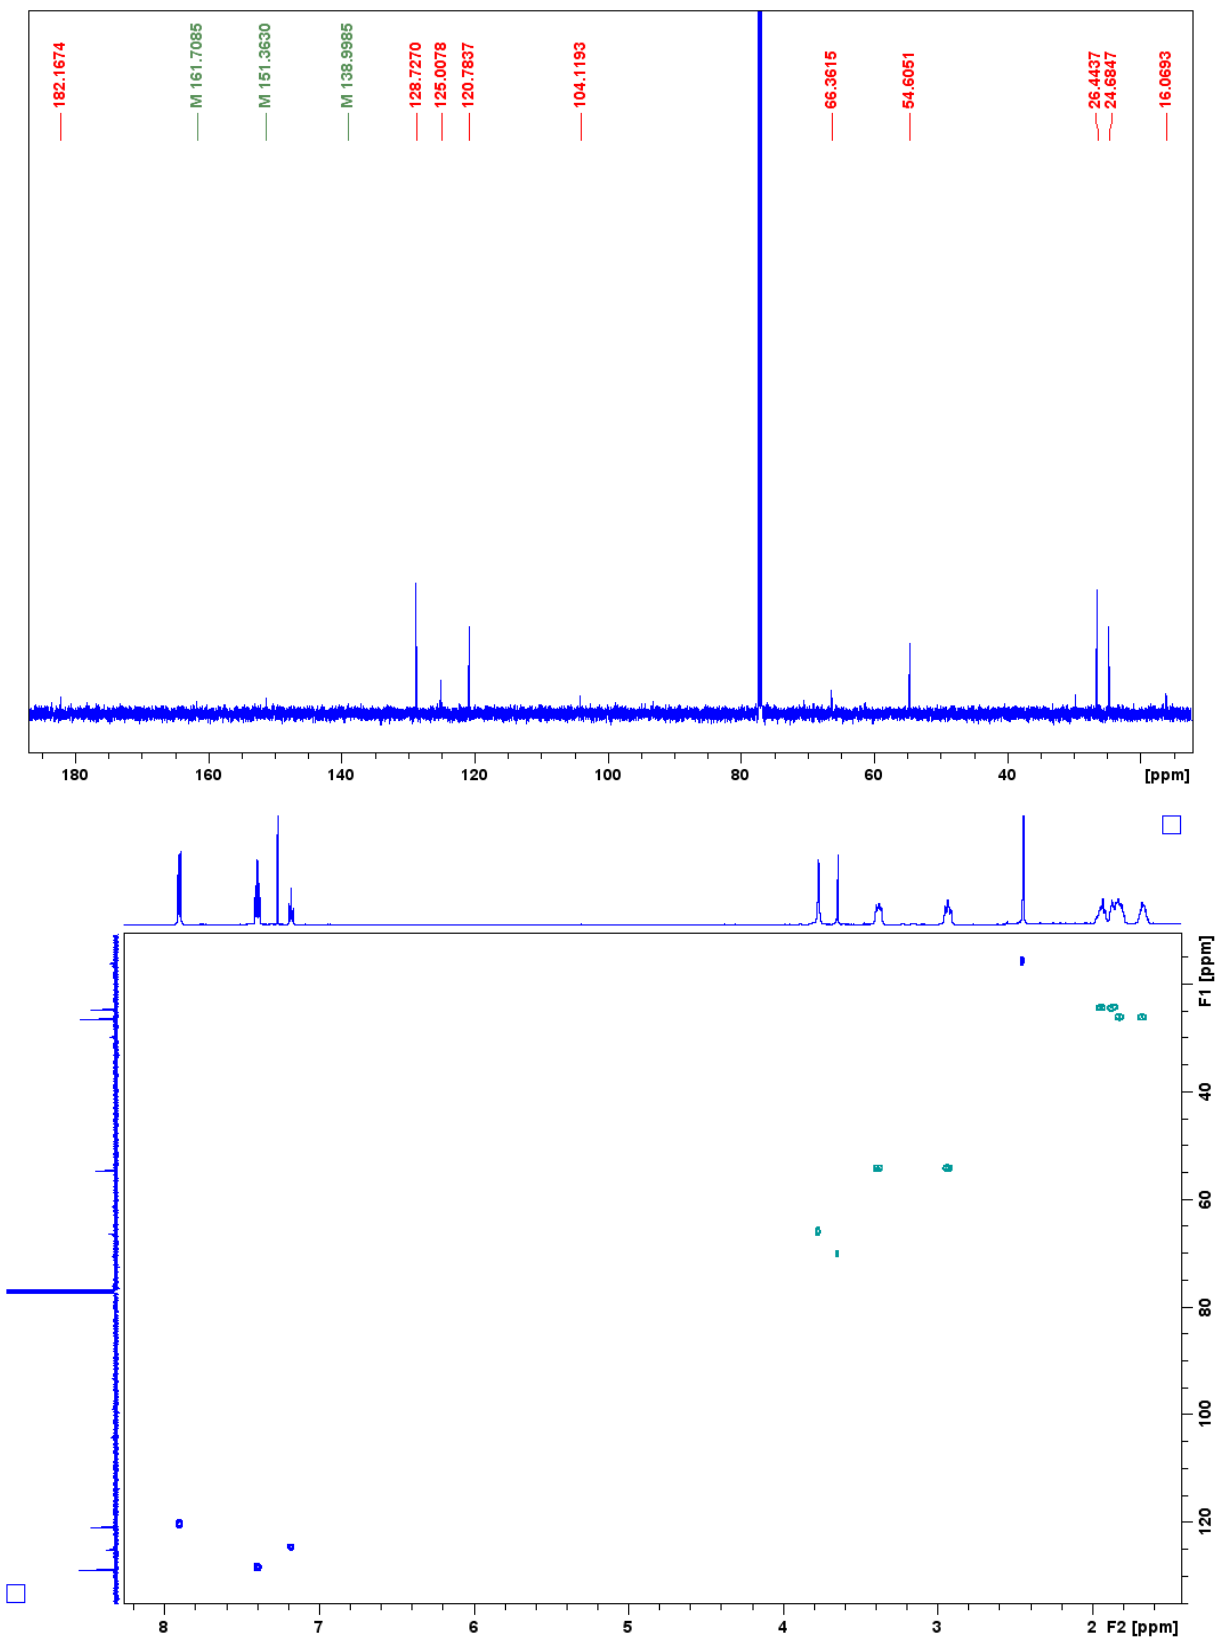

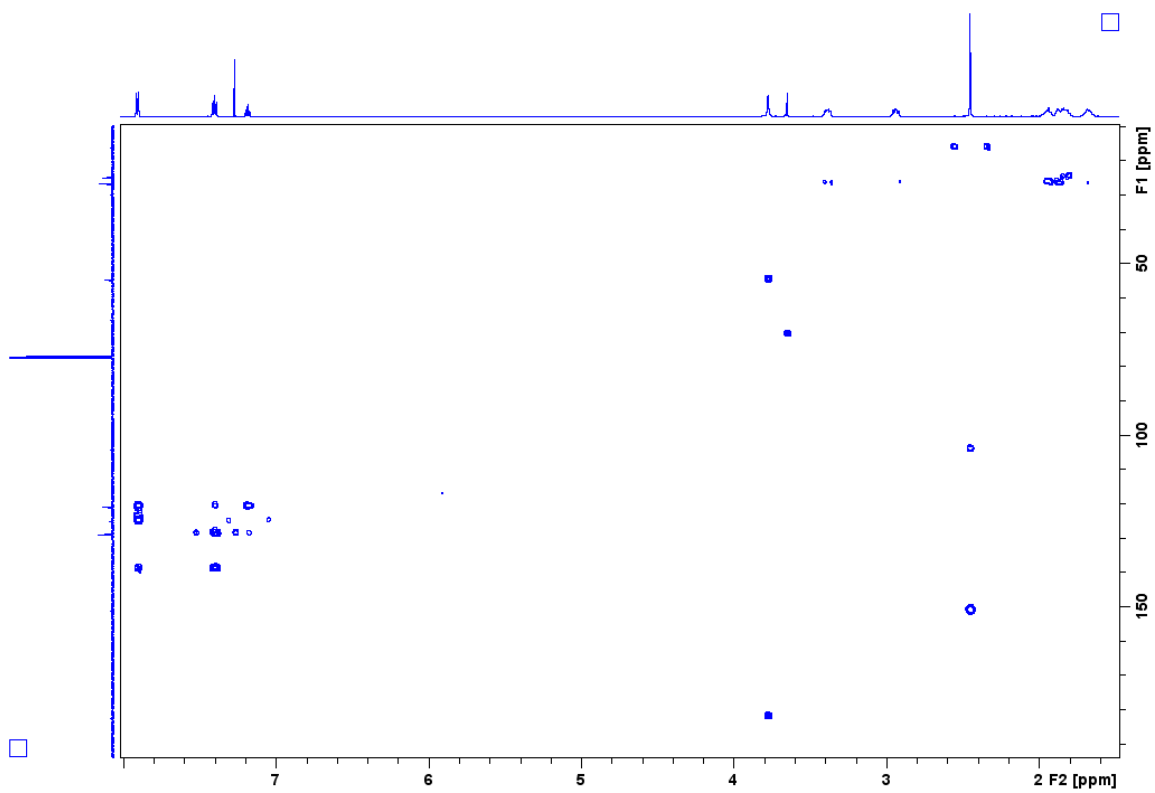

Compound **4h**

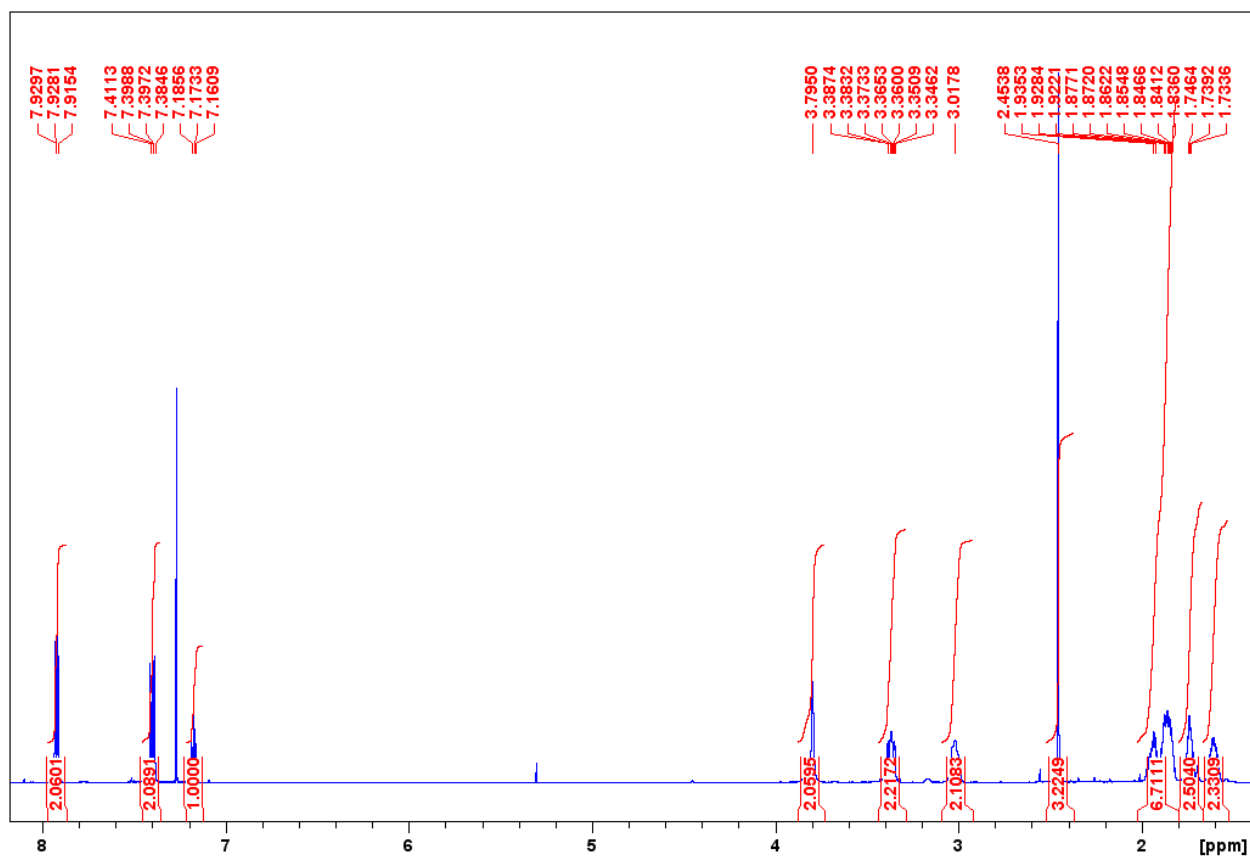



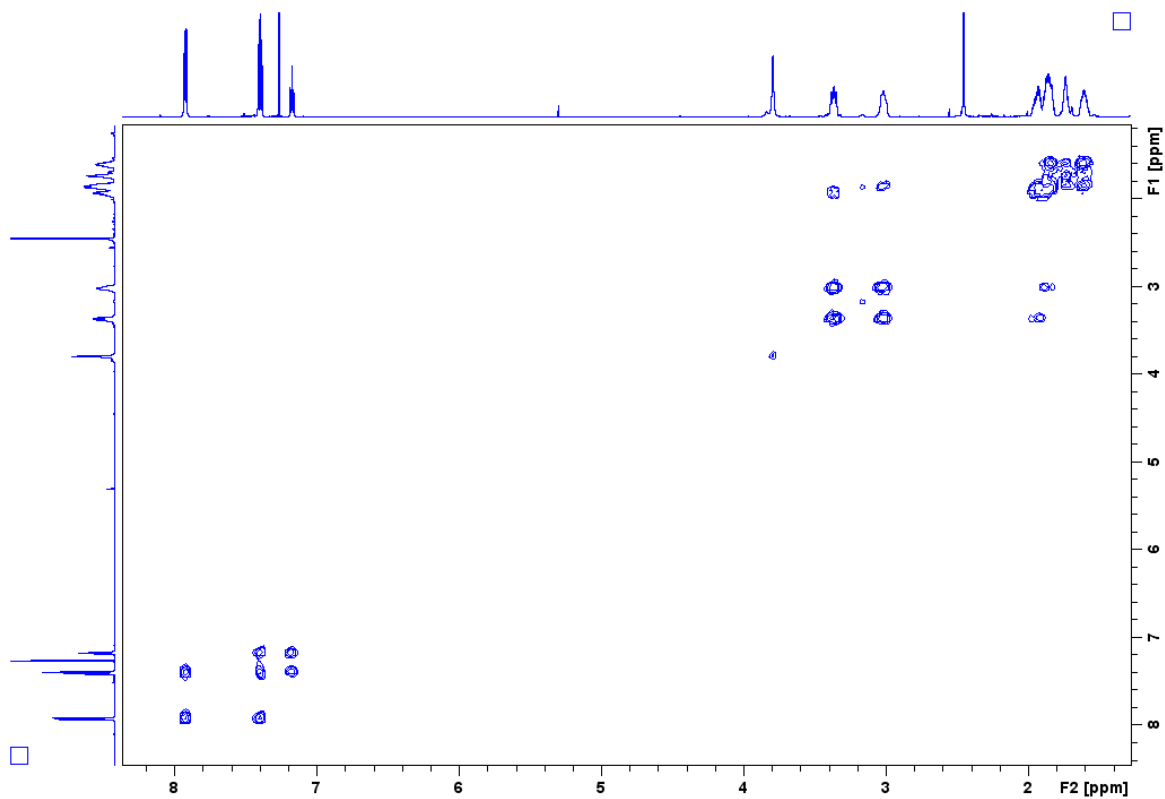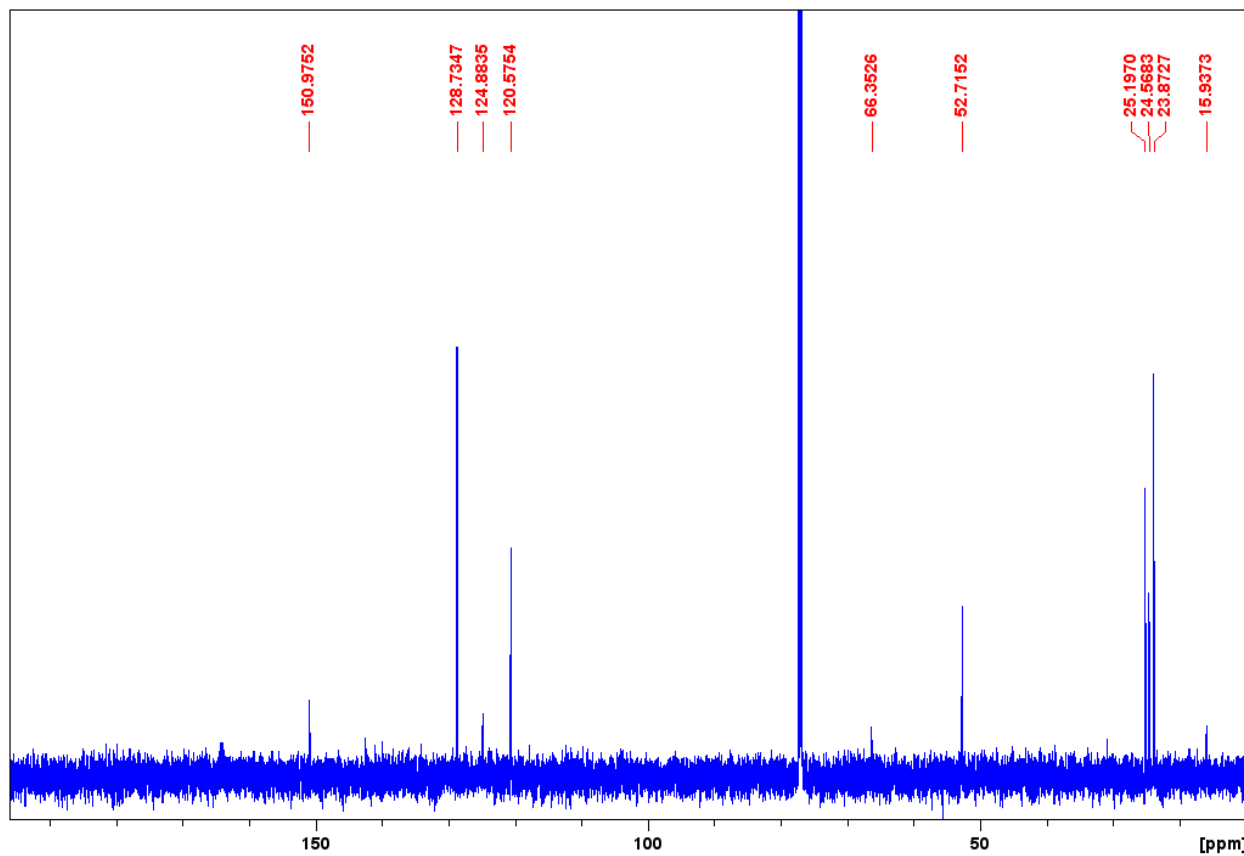

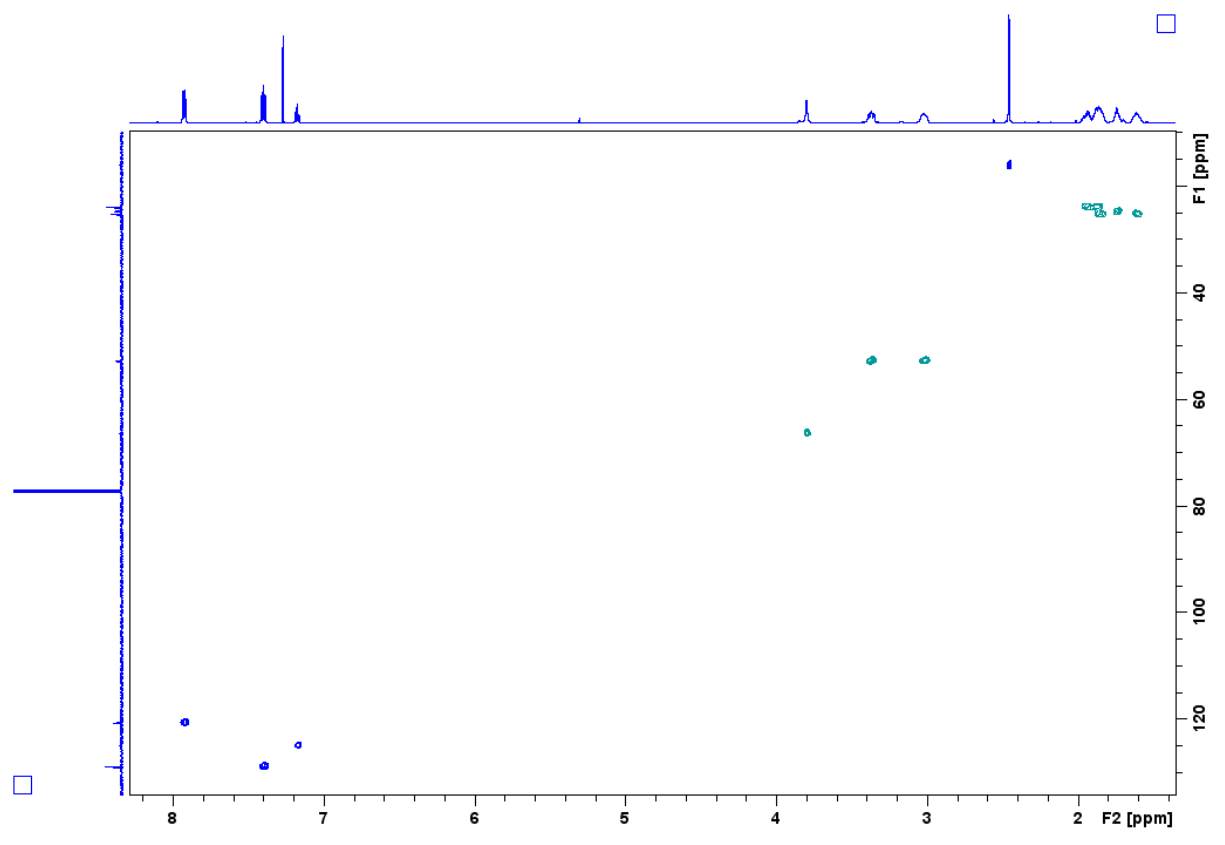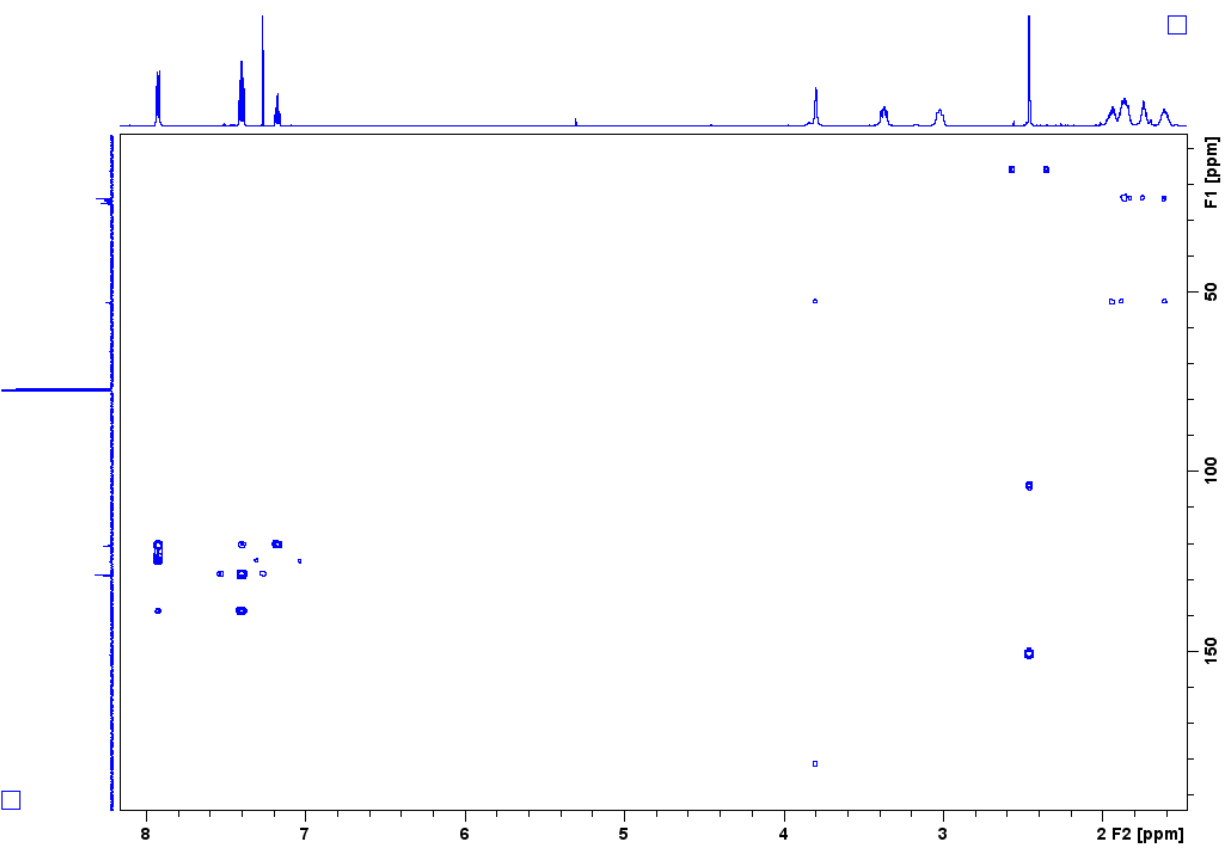

Compound **4i**

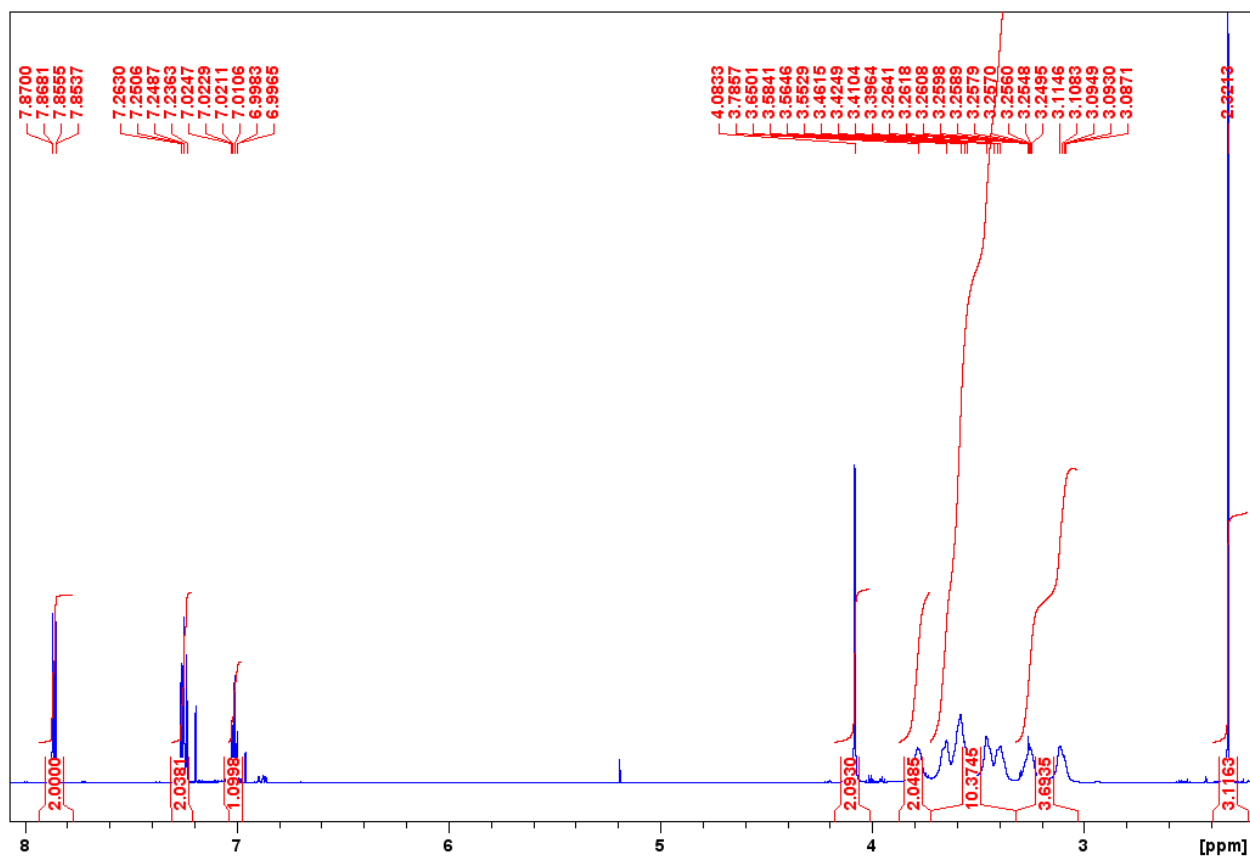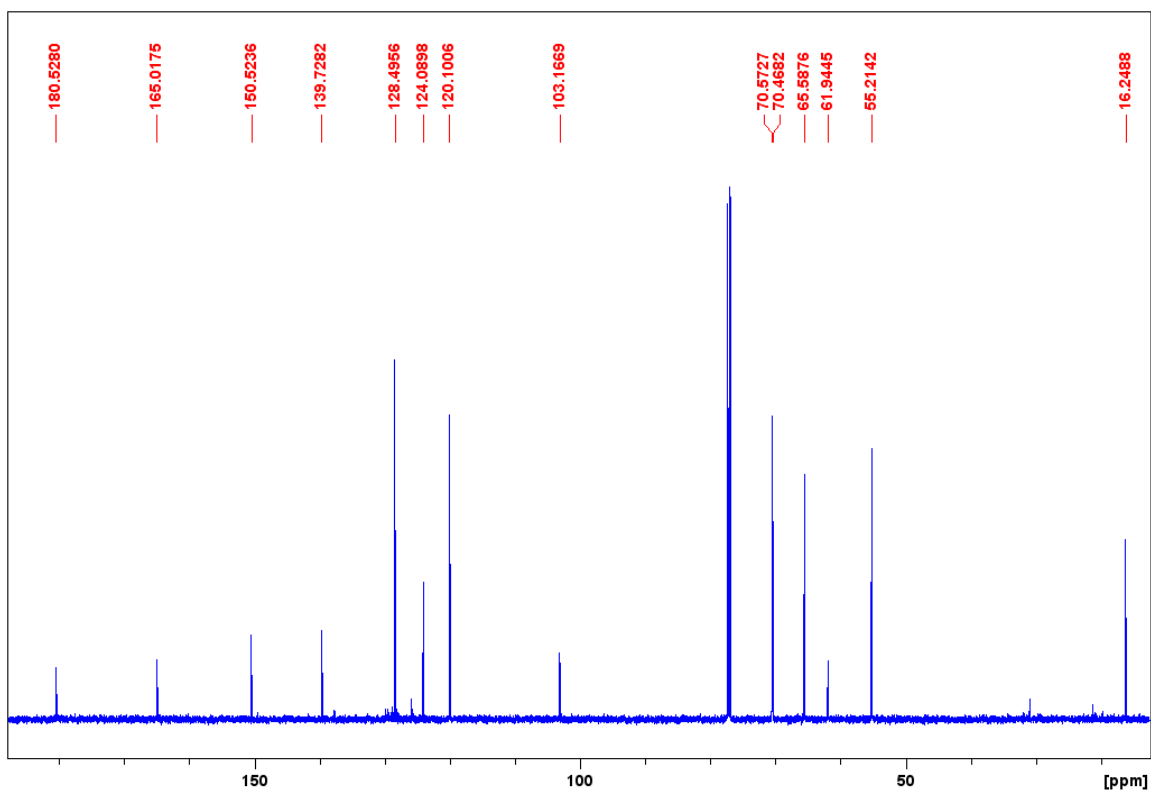

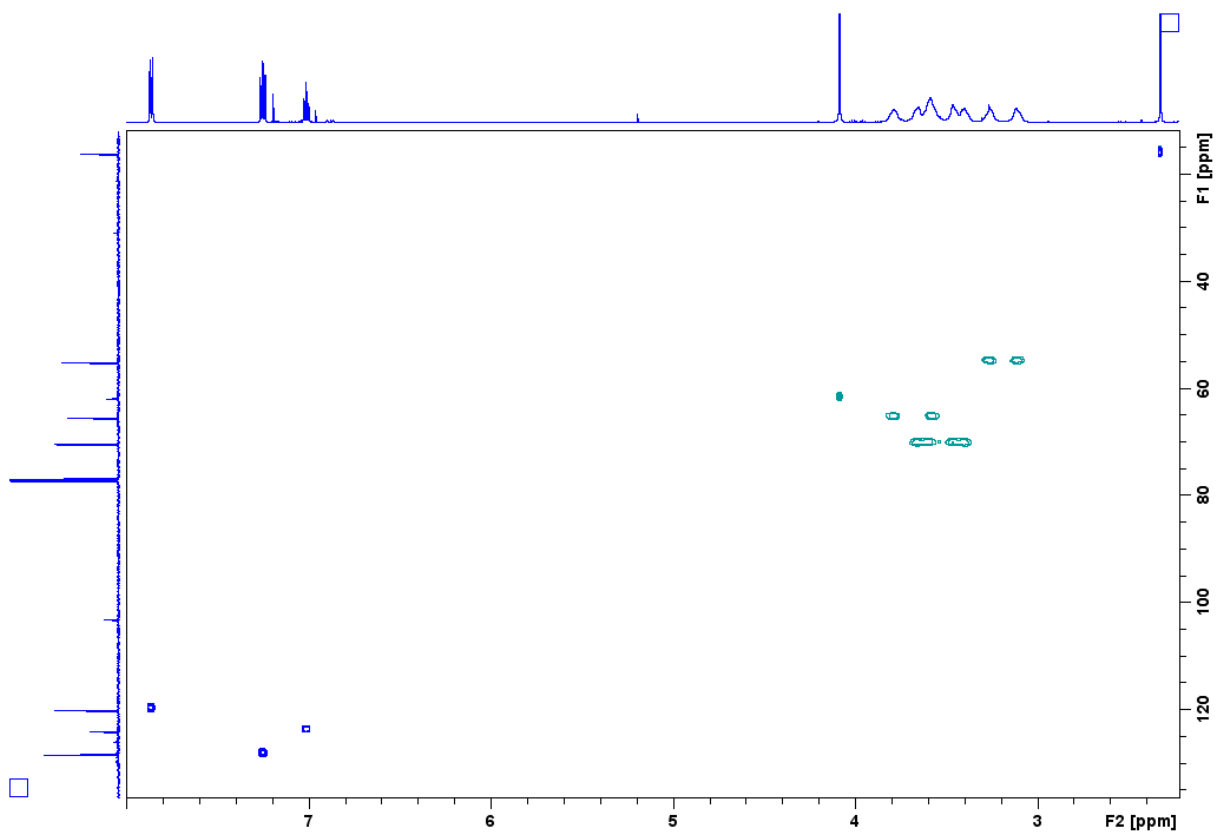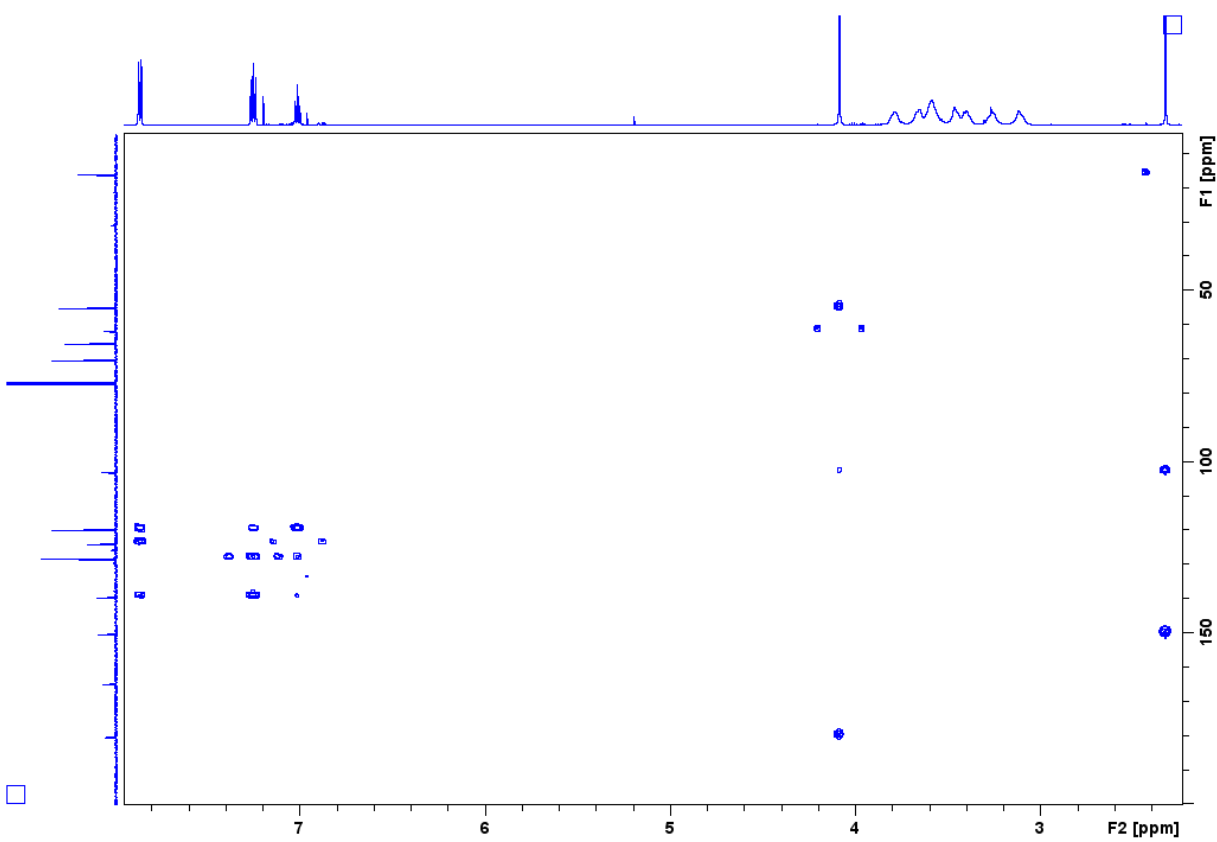

Compound 4j

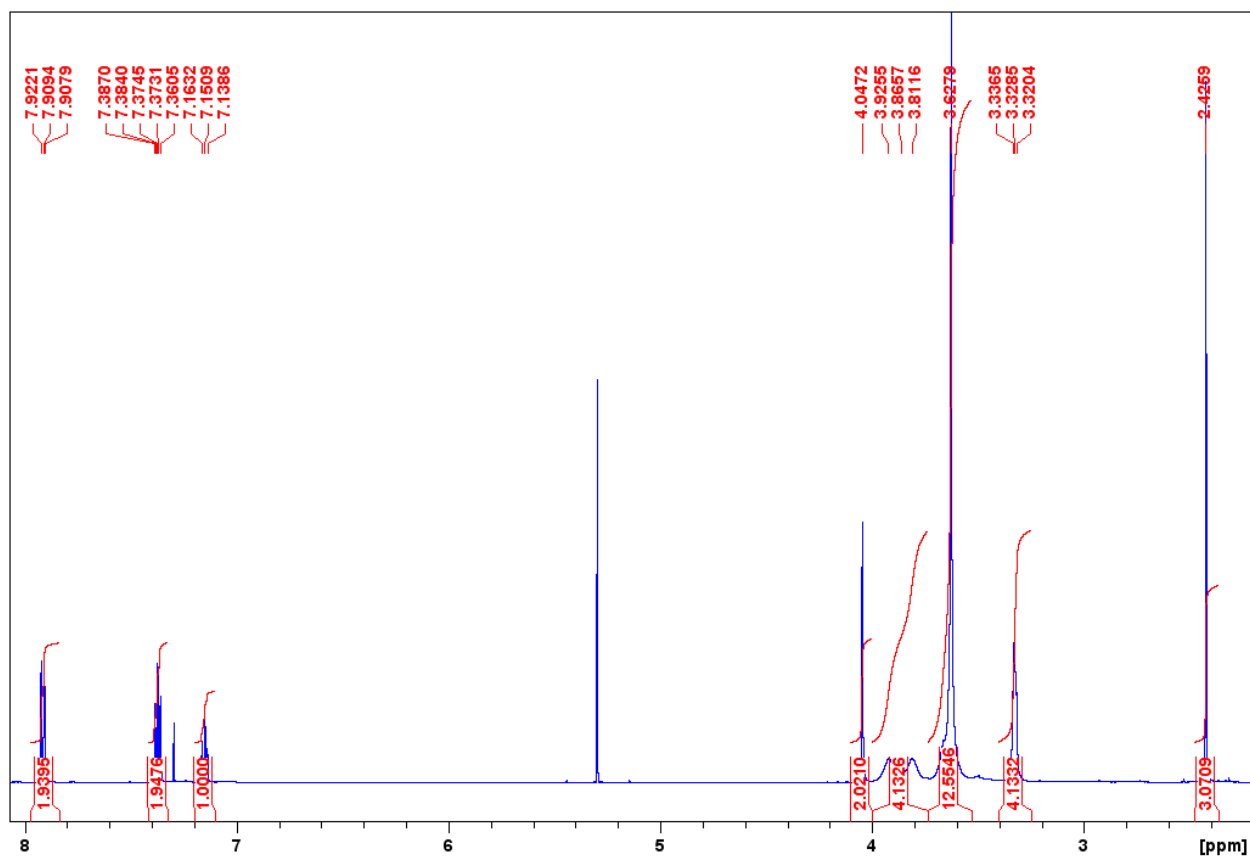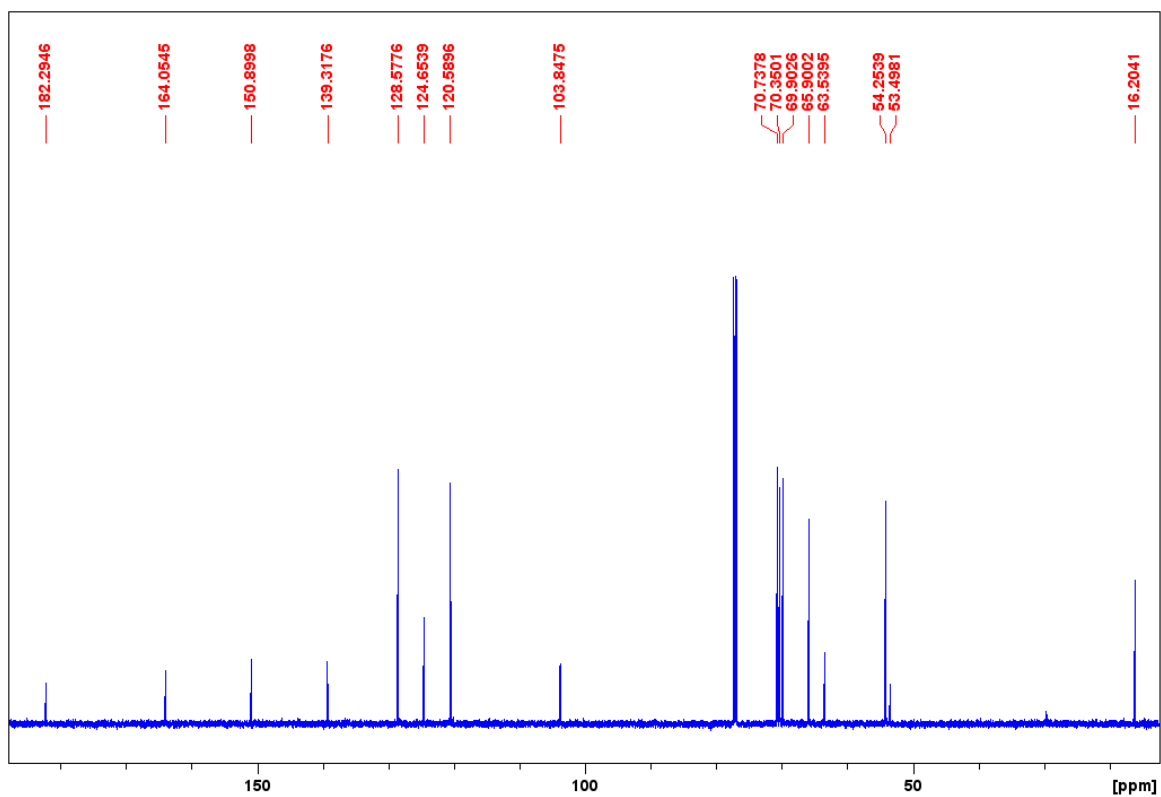

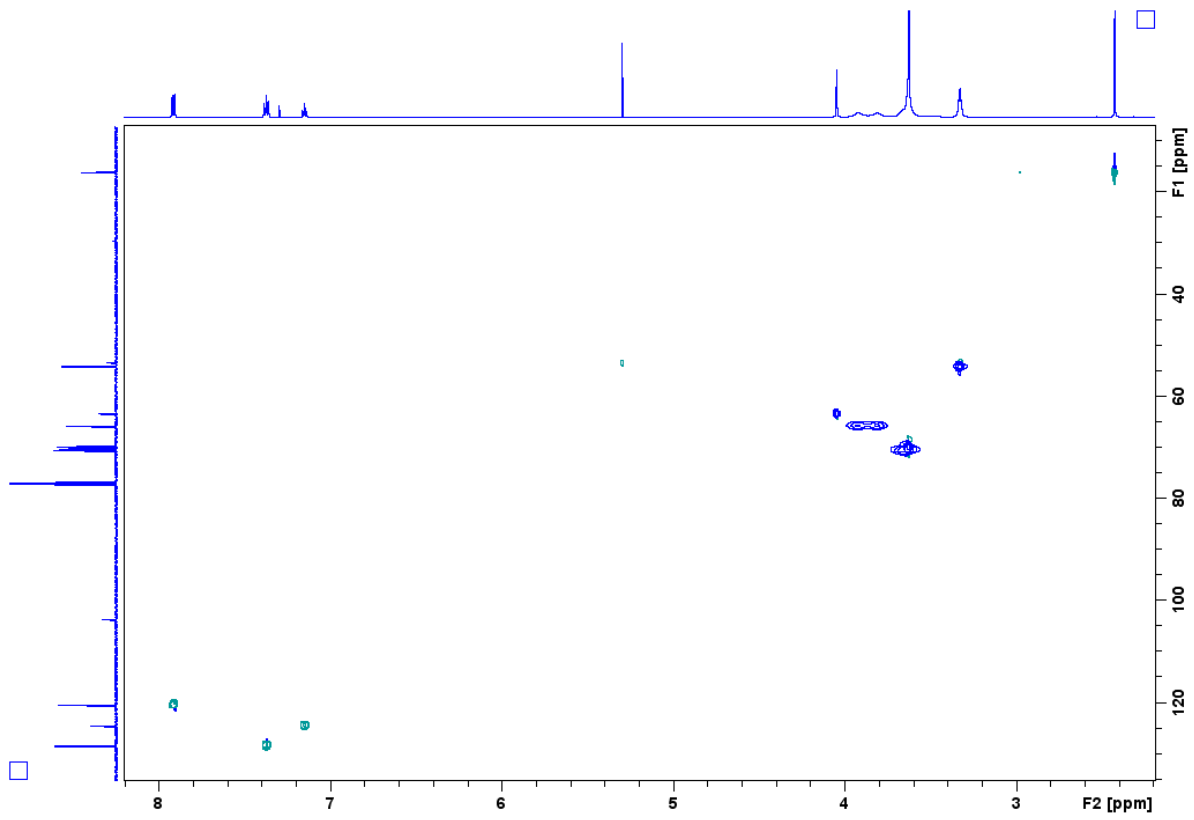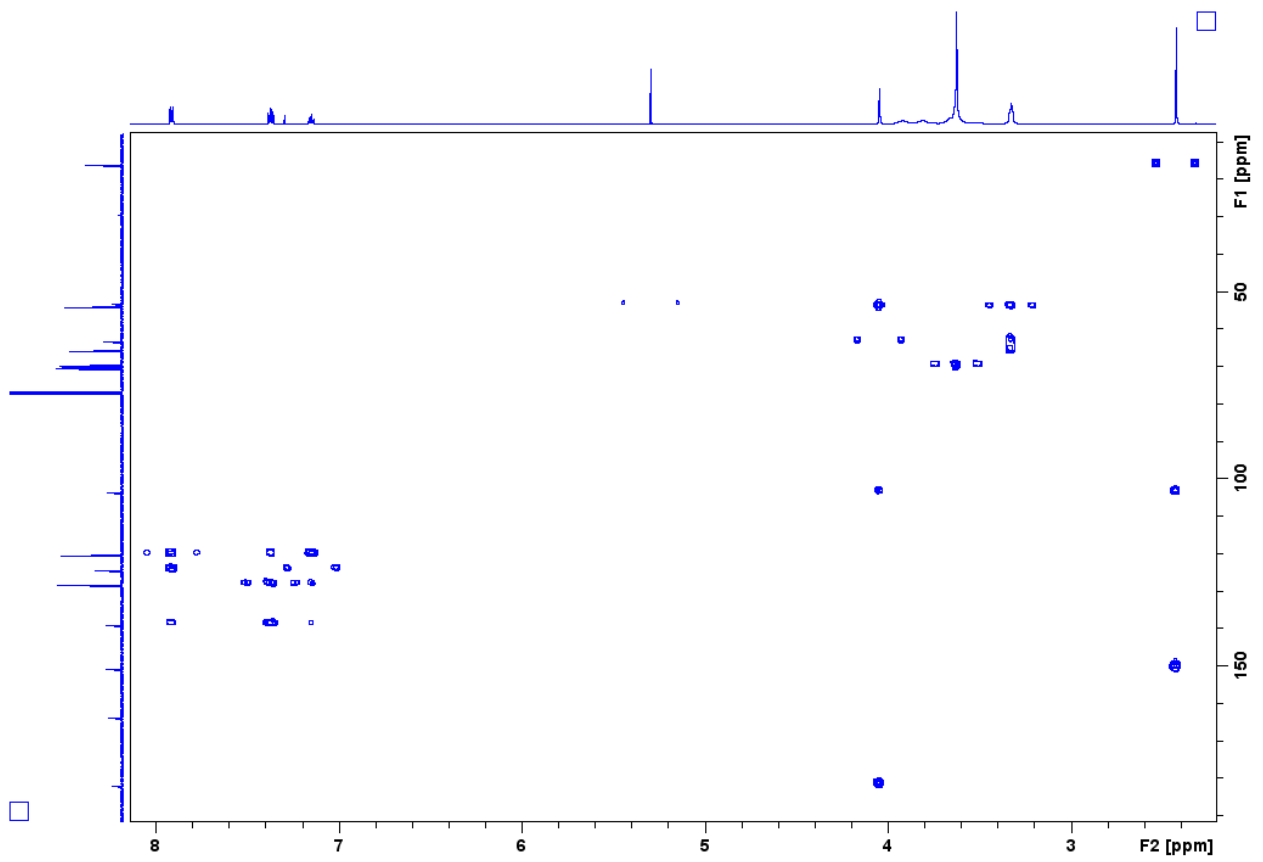

### HR-MS spectra:

#### Compound 2-Cs<sub>2</sub>CO<sub>3</sub> complex:

VK\_PC04-02 #142 RT: 0.32 AV: 1 NL: 9.46E7  
T: FTMS + p ESI Full ms [66.7000-1000.0000]

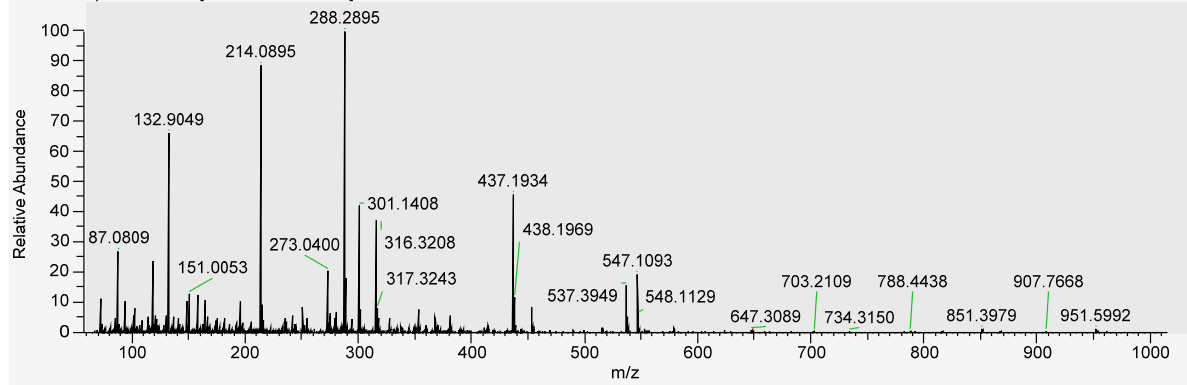

VK\_PC04-02 #142 RT: 0.32 AV: 1 NL: 8.38E7  
T: FTMS + p ESI Full ms [66.7000-1000.0000]

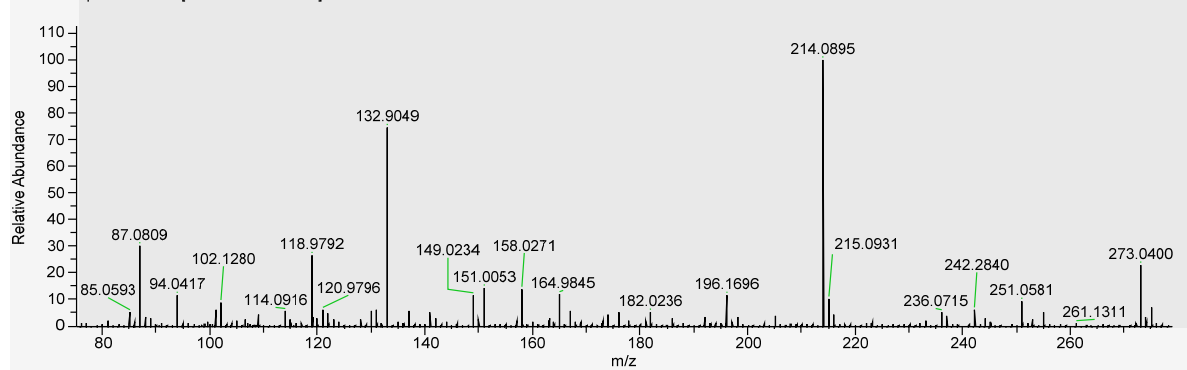

#### Compound 4c

VK\_P01\_pos\_03 #259 RT: 0.58 AV: 1 NL: 1.93E8  
T: FTMS + p ESI Full ms [52.7000-790.0000]

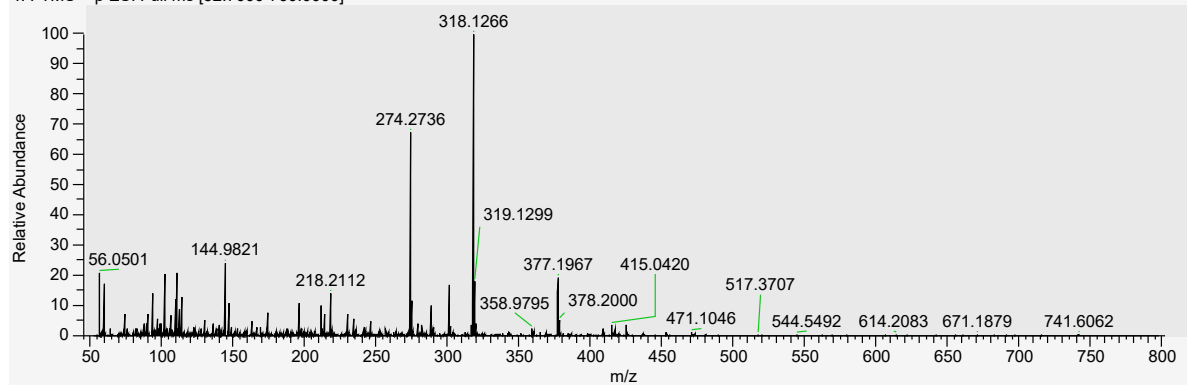

### Compound 4d

VK\_P02\_pos\_02 #268 RT: 0.60 AV: 1 NL: 3.32E8  
T: FTMS + p ESI Full ms [52.7000-790.0000]

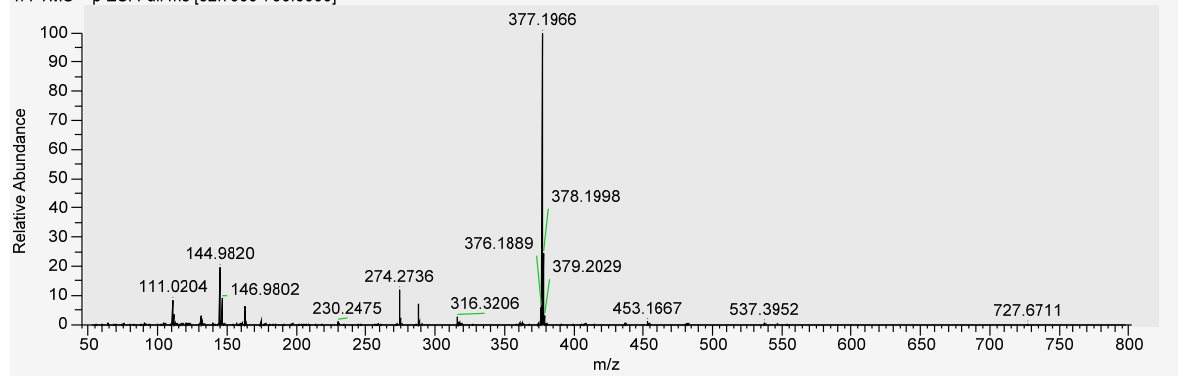

### Compound 4e

VK\_P03\_pos\_03 #13 RT: 0.03 AV: 1 NL: 4.44E8  
T: FTMS + p ESI Full ms [50.0000-700.0000]

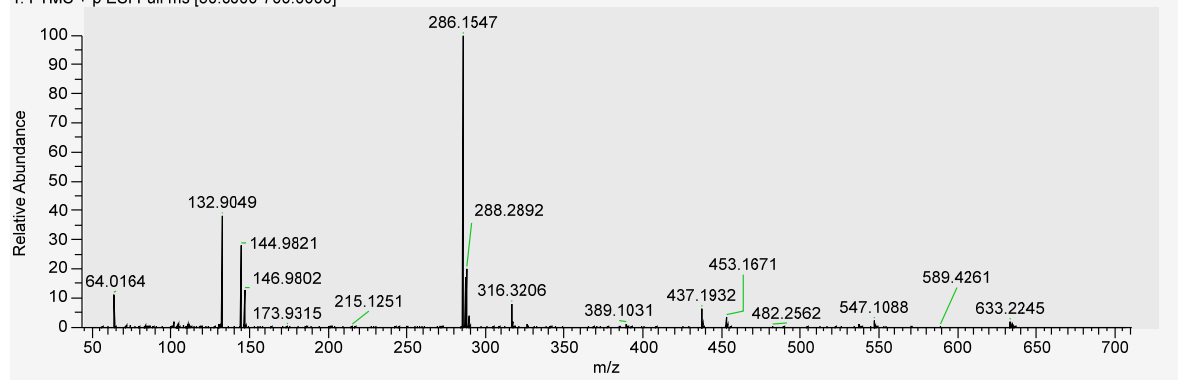

### Compound 4f

VK-P04-01 #26 RT: 0.06 AV: 1 NL: 5.21E8  
T: FTMS + p ESI Full ms [66.7000-1000.0000]

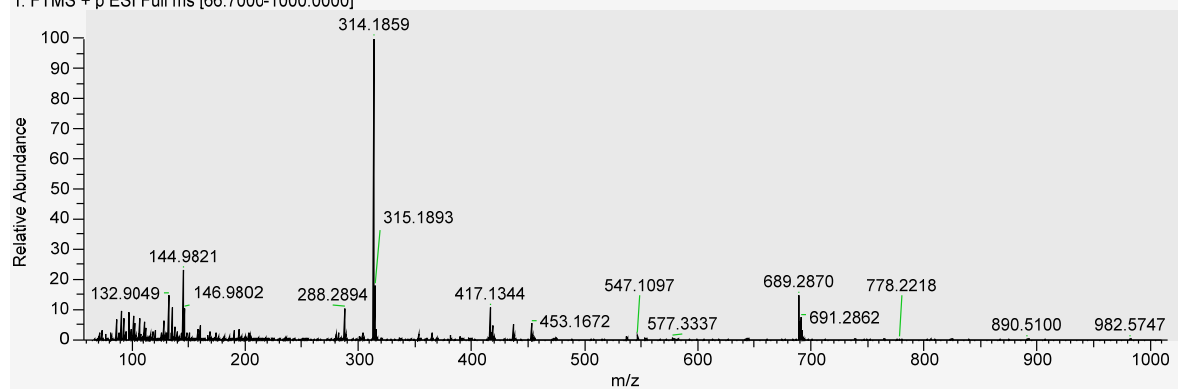



### Compound 4h

VK-P05-01\_01 #47 RT: 0.11 AV: 1 NL: 1.38E9  
T: FTMS + p ESI Full ms [66.7000-1000.0000]

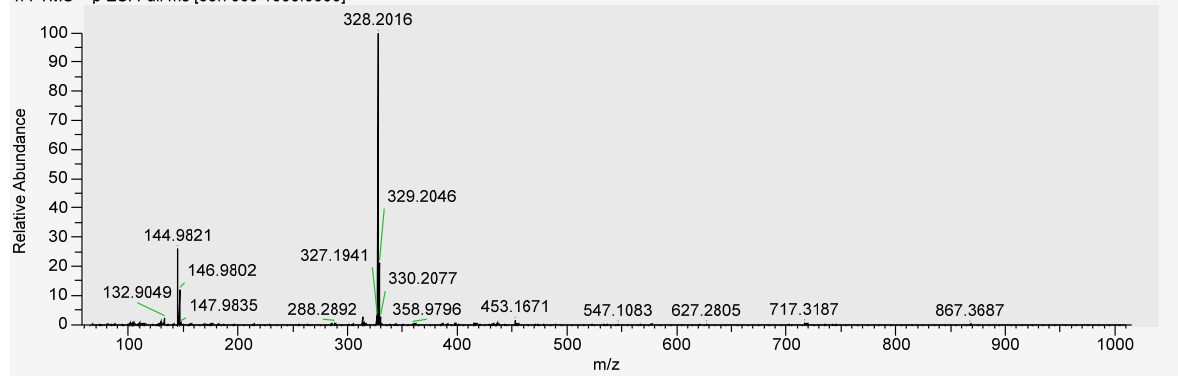

### Compound 4i

VK\_P06\_01 #18 RT: 0.04 AV: 1 NL: 5.10E7  
T: FTMS + p ESI Full ms [80.0000-1000.0000]

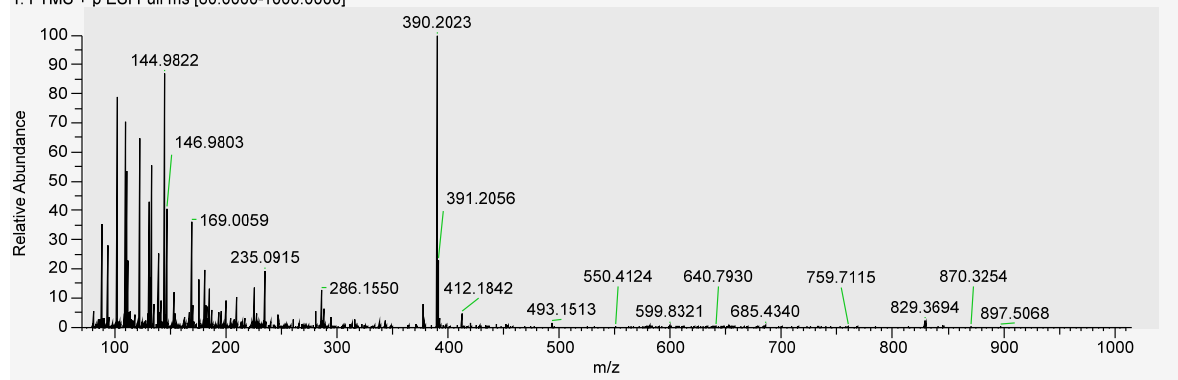

### Compound 4c-Cs<sub>2</sub>CO<sub>3</sub> complex:

VK\_PC05\_pos\_03 #554 RT: 1.24 AV: 1 NL: 7.07E8  
T: FTMS + p ESI Full ms [81.0000-1000.0000]

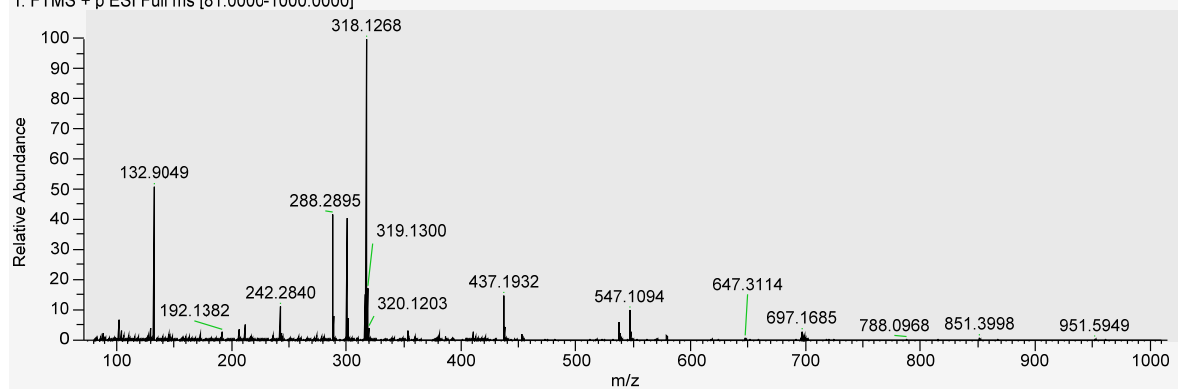

VK\_PC05\_pos\_03 #554 RT: 1.24 AV: 1 NL: 3.61E8  
T: FTMS + p ESI Full ms [81.0000-1000.0000]

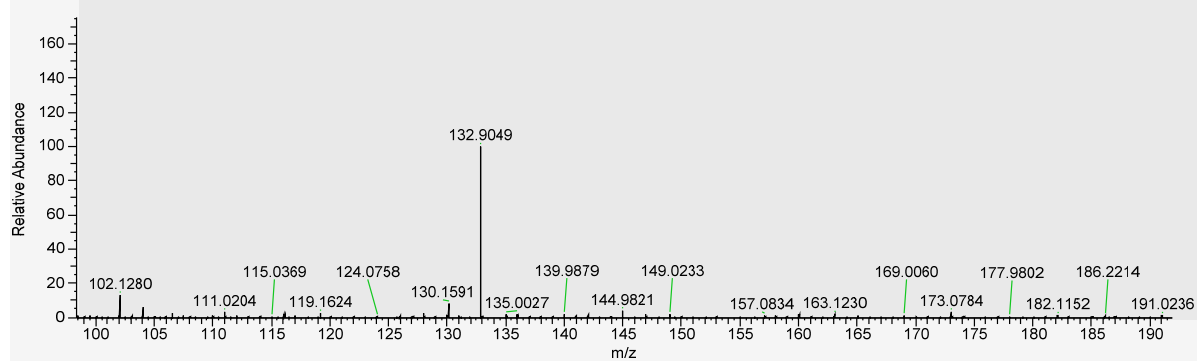

### Compound **4d**- $\text{Cs}_2\text{CO}_3$ complex:

VK\_PC01\_02 #87 RT: 0.19 AV: 1 NL: 1.08E9  
T: FTMS + p ESI Full ms [80.0000-1000.0000]

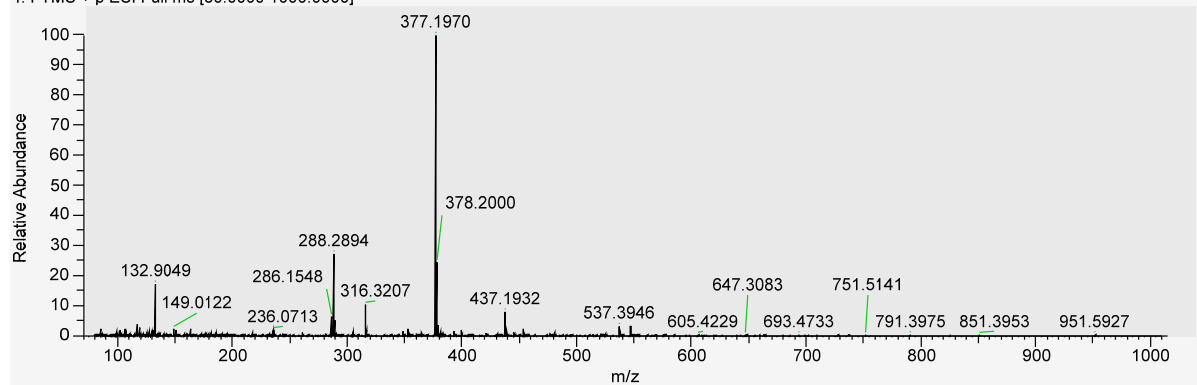

VK\_PC01\_02 #87 RT: 0.19 AV: 1 NL: 1.85E8  
T: FTMS + p ESI Full ms [80.0000-1000.0000]

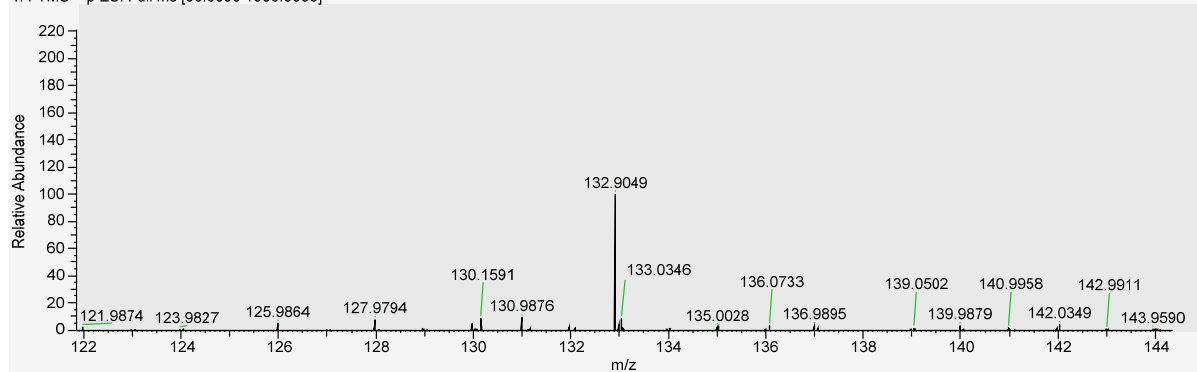

*Compound 4i-C<sub>2</sub>CO<sub>3</sub> complex:*

VK\_PC02\_02 #114 RT: 0.26 AV: 1 NL: 5.67E8  
T: FTMS + p ESI Full ms [50.0000-750.0000]

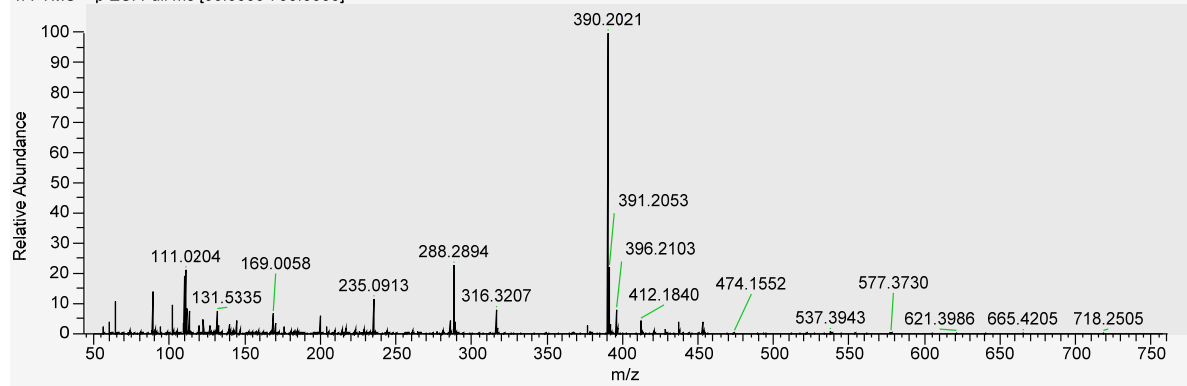

VK\_PC02\_02 #114 RT: 0.26 AV: 1 NL: 4.32E7  
T: FTMS + p ESI Full ms [50.0000-750.0000]

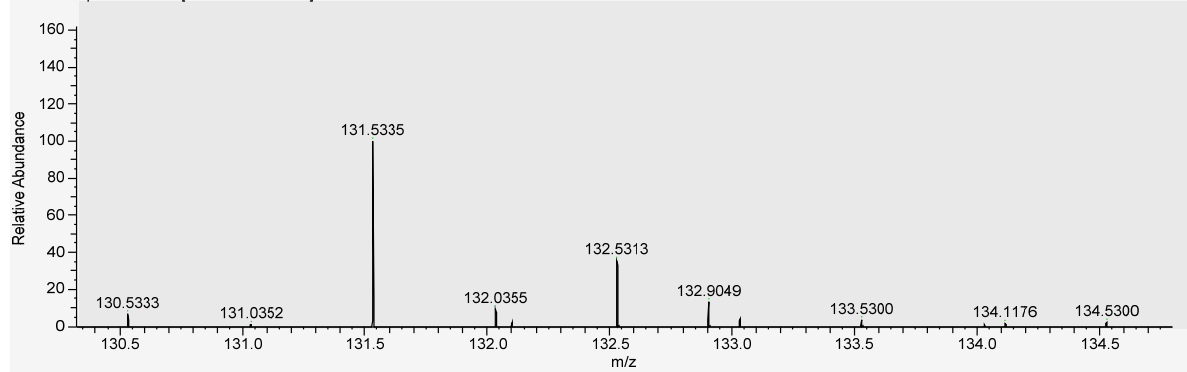

*Compound 4j-C<sub>2</sub>CO<sub>3</sub> complex:*

VK\_PC03-01 #64 RT: 0.14 AV: 1 NL: 3.91E8  
T: FTMS + p ESI Full ms [66.7000-1000.0000]

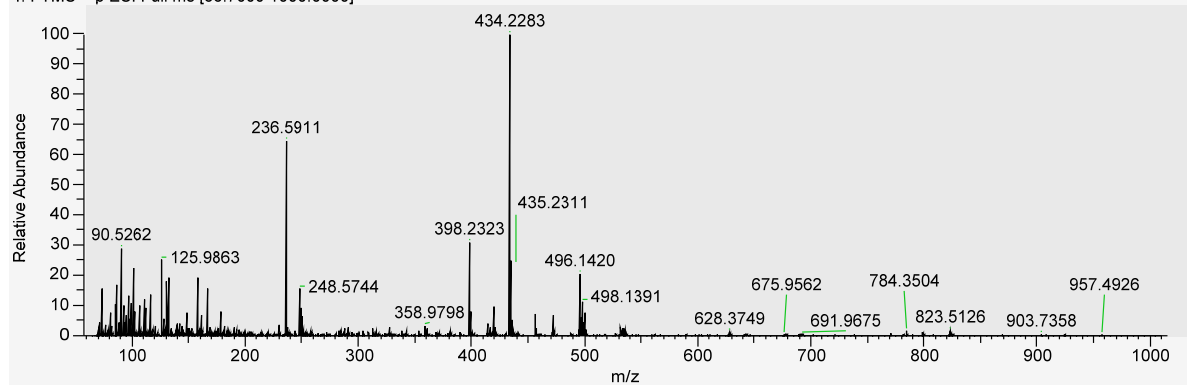

VK\_PC03-01 #64 RT: 0.14 AV: 1 NL: 7.53E7  
T: FTMS + p ESI Full ms [66.7000-1000.0000]

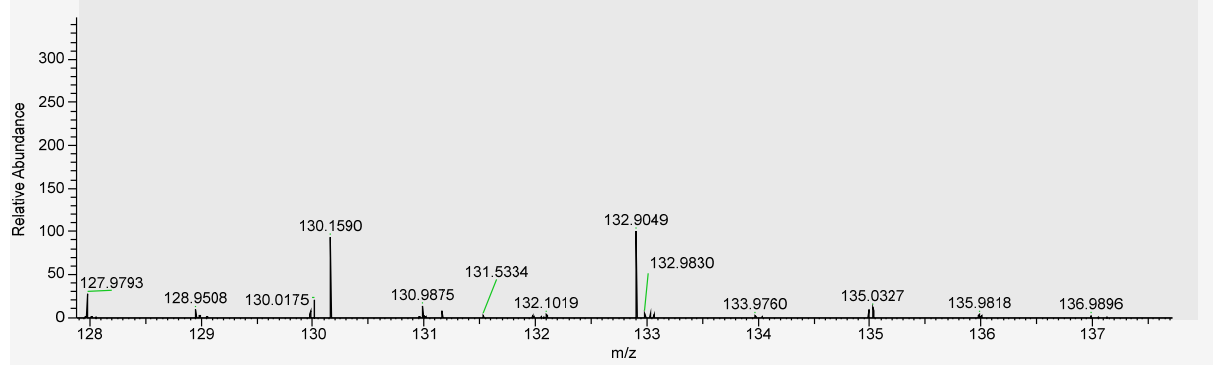

Supplement: d1nj05458a1.pdf [file d1nj05458a1.pdf]
